# Supplementary material for: Copper-catalyzed carbon–carbon bond cleavage of primary propargyl alcohols: β-carbon elimination of hemiaminal intermediates
Source: Royal Society of Chemistry journal article supplement (doi:10.1039/c5cy00783f), 2015-01-01

## Supporting information

### **Copper-catalyzed carbon-carbon bond cleavage of primary propargyl alcohols: $\beta$ -carbon elimination of hemiaminal intermediates**

Ye-Won Kang,<sup>a</sup> Yu Jin Cho,<sup>a</sup> Kwang-Youn Ko,<sup>c</sup> Hye-Young Jang<sup>a,b\*</sup>

<sup>a</sup>Department of Energy Systems Research, Ajou University, Suwon 443-749, Korea, <sup>b</sup>Korea Carbon Capture & Sequestration R&D Center, Deajeon 305-343, Korea, <sup>c</sup>Department of Chemistry, Ajou University, Suwon 443-749

### Table of Contents

|      |                                                              |        |
|------|--------------------------------------------------------------|--------|
| I.   | Experimental .....                                           | S2     |
| II.  | GC analysis of the reaction of <b>1a</b> .....               | S3     |
| III. | GS-MS analysis of conversion of <b>1a</b> to <b>1b</b> ..... | S4     |
| IV.  | Optimization results of <b>2b-5b</b> .....                   | S5-S6  |
| V.   | Spectral data for <b>1b-6b</b> and <b>1d-11d</b> .....       | S7-S80 |

## Experimental Section

**General.** Proton nuclear magnetic resonance ( $^1\text{H}$  NMR) spectra were recorded with a Varian Mercury plus (400 MHz) spectrometer at 25 °C. Chemical shifts are reported in delta ( $\delta$ ) units, part per million (ppm) downfield from trimethylsilane. Coupling constants are reported in Hertz (Hz). Carbon-13 nuclear magnetic resonance ( $^{13}\text{C}$  NMR) spectra were recorded with a Varian Mercury plus (100 MHz) spectrometer. Chemical shifts are reported in delta ( $\delta$ ) units, part per million (ppm) relative to the center of the triplet at 77.16 ppm for deuteriochloroform. High resolution mass spectra were obtained with a magnetic sector-electric sector double focusing mass analyzer equipment. IR spectra were recorded with a FT-IR spectrometer. Products **1d**<sup>1</sup> and **1e**<sup>2</sup>, exhibited spectral properties consistent with previous literature reports.

**Representative procedure for the reaction:** Copper(II) acetate (4.5 mg, 0.025 mmol), 2,2,6,6-tetramethylpiperidine *N*-oxy (TEMPO, 3.9 mg, 0.025 mmol), and morpholine (65.3 mg, 0.75 mmol) were added to a solution of 3-phenylprop-2-yn-1-ol **1a** (66.1 mg, 0.5 mmol) in toluene (0.5 M, 1 ml). A slow stream of O<sub>2</sub> was passed through this solution for 1 min. It stirred for 18 h at 100 °C under O<sub>2</sub> atmosphere. The reaction mixture was evaporated and purified by flash silica gel column chromatography using 1% ethyl acetate/hexane to afford 1,4-diphenylbuta-1,3-diyne **1b** (42.1 mg, 83 %).

**Representative procedure for the triazole formation:** Copper(II) acetylacetonate (6.5 mg, 0.025 mmol), 2,2,6,6-tetramethylpiperidine *N*-oxy (TEMPO, 3.9 mg, 0.025 mmol), and *N*-benzylmethylamine (90.9 mg, 0.75 mmol) were added to a solution of 3-phenylprop-2-yn-1-ol **1a** (66.1 mg, 0.5 mmol) and azidomethylbenzene **1c** (99.9 mg, 0.75 mmol) in toluene (0.5 M, 1 ml). A slow stream of O<sub>2</sub> was passed through this solution for 1 min. It stirred for 18h at 100 °C under O<sub>2</sub> atmosphere. The reaction mixture was evaporated and purified by flash silica gel column chromatography using 8% ethyl acetate/hexane to afford 1-benzyl-4-phenyl-1H-1,2,3-triazole **1d** (100.4 mg, 85 %).

---

<sup>1</sup> G. Cheng, X. Zeng, J. Shen, X. Wang, X. Cui, *Angew. Chem. Int. Ed.* **2013**, *52*, 13265.

<sup>2</sup> A. V. Khramchikhin, M. D. Stadnichuk, *J. Gen. Chem. USSR*, **1991**, *61*, 1864.

The reaction of 1a was monitored by gas chromatography (GC).

### General GC conditions

Gas chromatography analysis was performed on an Agilent 6890N instrument with a FID detector and HP-5 capillary column (polydimethylsiloxane with 5% phenyl groups, 30m, 0.32 mmi.d., 0.25 mm film thickness) using nitrogen as a carrier gas.

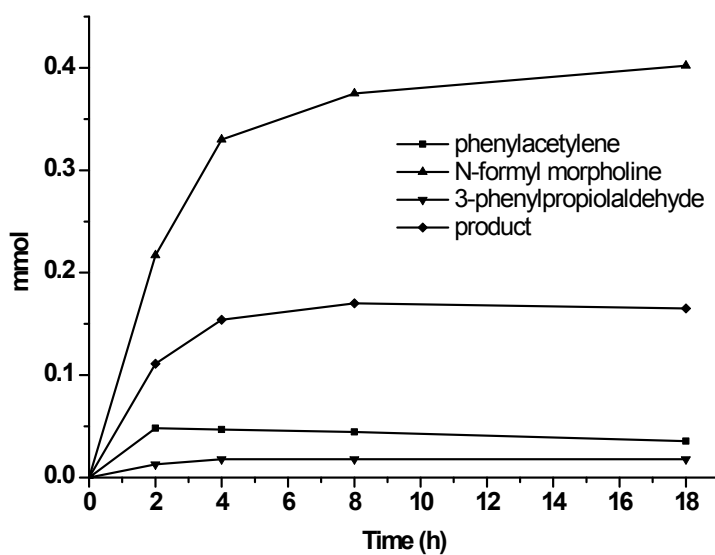

The copper-catalyzed conversion of 1a to 1b was analyzed by GC-MS to detect phenylpropionaldehydes. (The below spectrum was obtained after 2 h)

### GC-MS conditions

The GC-MS analysis of a reaction mixture was performed using a temperature program of 110 °C for 0 minutes, 10 °C/min up to 200 °C and hold for 10 minutes, on Agilent GC-MS system (6890 GC and 5973 mass spectrum analyzer with EI ionization) with a HP-5MS (30 m x 250 μm x 0.25 μm) capillary column. The flow rate of helium as carrier gas was 0.6 mL min<sup>-1</sup> under a condition of constant flow. Qualitative analysis was based on the comparison of retention times and the computer mass spectra libraries using Wiley 275 GC/MS Library (Wiley, New York).

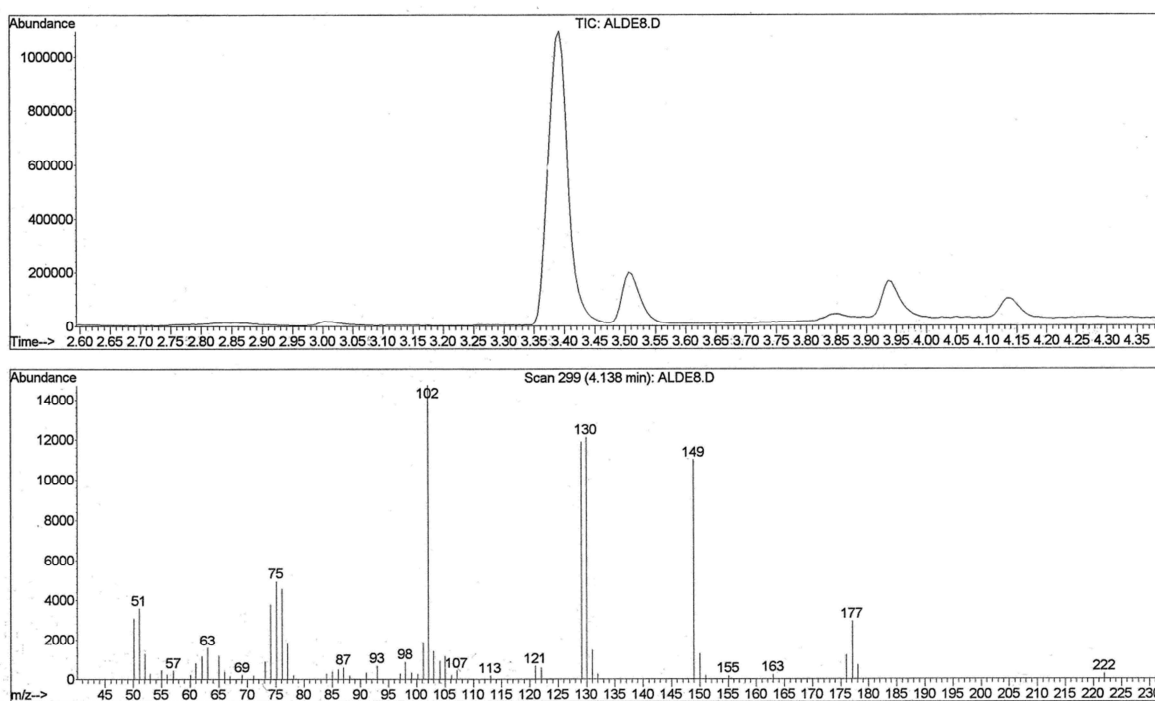

**Optimization of each compound:** Initially, aliphatic compound **5b** was optimized after the best conditions for **1b** were observed. Both aromatic and aliphatic propargyl alcohols favor either  $\text{Cu}(\text{OAc})_2$  or  $\text{Cu}(\text{acac})_2$ . Depending on substrates, different additives and the concentration were selected to obtain the good yield.

### Optimization results of 2b

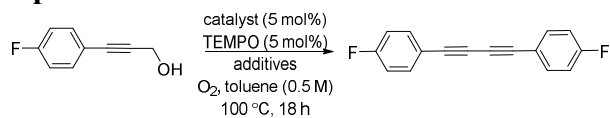

| entry | catalyst                   | additives (equiv) | Yield                 |
|-------|----------------------------|-------------------|-----------------------|
| 1     | $\text{Cu}(\text{OAc})_2$  | morpholine (1.5)  | 42%                   |
| 2     | $\text{Cu}(\text{OAc})_2$  | piperidine (1.5)  | 52%                   |
| 3     | $\text{Cu}(\text{OAc})_2$  | pyrrolidine (1.5) | 59%(66%) <sup>a</sup> |
| 4     | $\text{Cu}(\text{OAc})_2$  | MeNHBn (1.5)      | 43%                   |
| 5     | $\text{Cu}(\text{acac})_2$ | morpholine (1.5)  | 51%(26%) <sup>a</sup> |
| 6     | $\text{Cu}(\text{acac})_2$ | piperidine (1.5)  | 39%                   |
| 7     | $\text{Cu}(\text{acac})_2$ | pyrrolidine (1.5) | 41%                   |
| 8     | $\text{Cu}(\text{acac})_2$ | MeNHBn (1.5)      | 40%                   |

<sup>a</sup>0.25 M concentration

### Optimization results of 3b

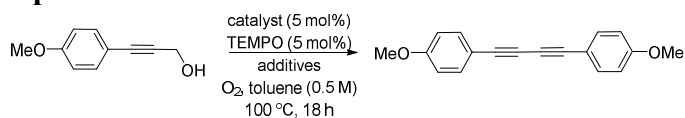

| entry | catalyst                   | additives (equiv) | Yield                 |
|-------|----------------------------|-------------------|-----------------------|
| 1     | $\text{Cu}(\text{OAc})_2$  | morpholine (1.5)  | 63%                   |
| 2     | $\text{Cu}(\text{OAc})_2$  | piperidine (1.5)  | 67%(62%) <sup>a</sup> |
| 3     | $\text{Cu}(\text{OAc})_2$  | pyrrolidine (1.5) | 61%                   |
| 4     | $\text{Cu}(\text{OAc})_2$  | MeNHBn (1.5)      | 35%                   |
| 5     | $\text{Cu}(\text{acac})_2$ | morpholine (1.5)  | 47%                   |
| 6     | $\text{Cu}(\text{acac})_2$ | piperidine (1.5)  | 46%                   |
| 7     | $\text{Cu}(\text{acac})_2$ | pyrrolidine (1.5) | 55%(68%) <sup>a</sup> |
| 8     | $\text{Cu}(\text{acac})_2$ | MeNHBn (1.5)      | 36%                   |

<sup>a</sup>0.25 M concentration

### Optimization results of 4b

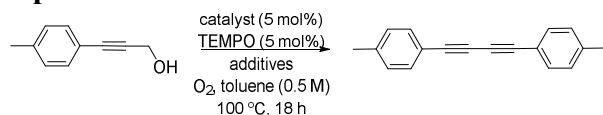

| entry | catalyst                   | additives (equiv) | Yield                 |
|-------|----------------------------|-------------------|-----------------------|
| 1     | $\text{Cu}(\text{OAc})_2$  | morpholine (1.5)  | 37%                   |
| 2     | $\text{Cu}(\text{OAc})_2$  | piperidine (1.5)  | 50%                   |
| 3     | $\text{Cu}(\text{OAc})_2$  | pyrrolidine (1.5) | 56%(75%) <sup>a</sup> |
| 4     | $\text{Cu}(\text{OAc})_2$  | MeNHBn (1.5)      | 45%                   |
| 5     | $\text{Cu}(\text{acac})_2$ | morpholine (1.5)  | 63%(57%) <sup>a</sup> |
| 6     | $\text{Cu}(\text{acac})_2$ | piperidine (1.5)  | 59%                   |
| 7     | $\text{Cu}(\text{acac})_2$ | pyrrolidine (1.5) | 55%                   |
| 8     | $\text{Cu}(\text{acac})_2$ | MeNHBn (1.5)      | 47%                   |

<sup>a</sup>0.25 M concentration

### Optimization results of 5b

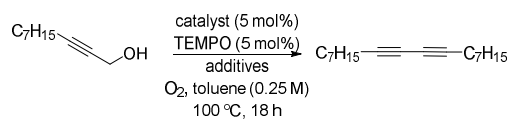

| entry | catalyst              | additives (equiv) | Yield                  |
|-------|-----------------------|-------------------|------------------------|
| 1     | Cu(OAc) <sub>2</sub>  | morpholine (1.5)  | 40% (22%) <sup>a</sup> |
| 2     | CuOAc                 | morpholine (1.5)  | 37%                    |
| 3     | CuCl <sub>2</sub>     | morpholine (1.5)  | -                      |
| 4     | Cu(acac) <sub>2</sub> | morpholine (1.5)  | 50%                    |
| 5     | CuCl                  | morpholine (1.5)  | 15%                    |
| 6     | CuI                   | morpholine (1.5)  | -                      |
| 7     | Cu(acac) <sub>2</sub> | piperidine (1.5)  | 57%                    |
| 8     | Cu(acac) <sub>2</sub> | pyrrolidine (1.5) | 74%                    |
| 9     | Cu(acac) <sub>2</sub> | MeNHBn (1.5)      | 75%                    |
| 10    | Cu(acac) <sub>2</sub> | MeNHBu (1.5)      | 38%                    |

<sup>a</sup>0.5 M concentration

### Optimization results of 6b

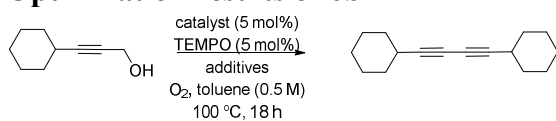

| entry | catalyst              | additives (equiv) | Yield                  |
|-------|-----------------------|-------------------|------------------------|
| 1     | Cu(OAc) <sub>2</sub>  | morpholine (1.5)  | 44%                    |
| 2     | Cu(OAc) <sub>2</sub>  | piperidine (1.5)  | 39%                    |
| 3     | Cu(OAc) <sub>2</sub>  | pyrrolidine (1.5) | 46%                    |
| 4     | Cu(OAc) <sub>2</sub>  | MeNHBn (1.5)      | 49% (31%) <sup>a</sup> |
| 5     | Cu(acac) <sub>2</sub> | morpholine (1.5)  | 55% (42%) <sup>a</sup> |
| 6     | Cu(acac) <sub>2</sub> | piperidine (1.5)  | 48%                    |
| 7     | Cu(acac) <sub>2</sub> | pyrrolidine (1.5) | 46%                    |
| 8     | Cu(acac) <sub>2</sub> | MeNHBn (1.5)      | 47%                    |

<sup>a</sup>0.25 M concentration

*1,4-diphenylbutadiyne* (Table 1, 1b). The representative procedure was followed to yield **1b** (42.1mg, 83%);  $^1\text{H}$  NMR (400 MHz,  $\text{CDCl}_3$ )  $\delta$  7.55 (m, 4H), 7.36 (m, 6H) ppm;  $^{13}\text{C}$  NMR (100 MHz,  $\text{CDCl}_3$ )  $\delta$  132.5, 129.2, 128.4, 121.8, 81.7, 74.1 ppm; IR (neat) 3049, 2148, 1592, 1485  $\text{cm}^{-1}$ ; HRMS (EI+) caclcd for  $\text{C}_{16}\text{H}_{10}(\text{M}^+)$  202.0783, found 202.0780.

$^1\text{H}$  NMR (400 MHz) at 25 °C

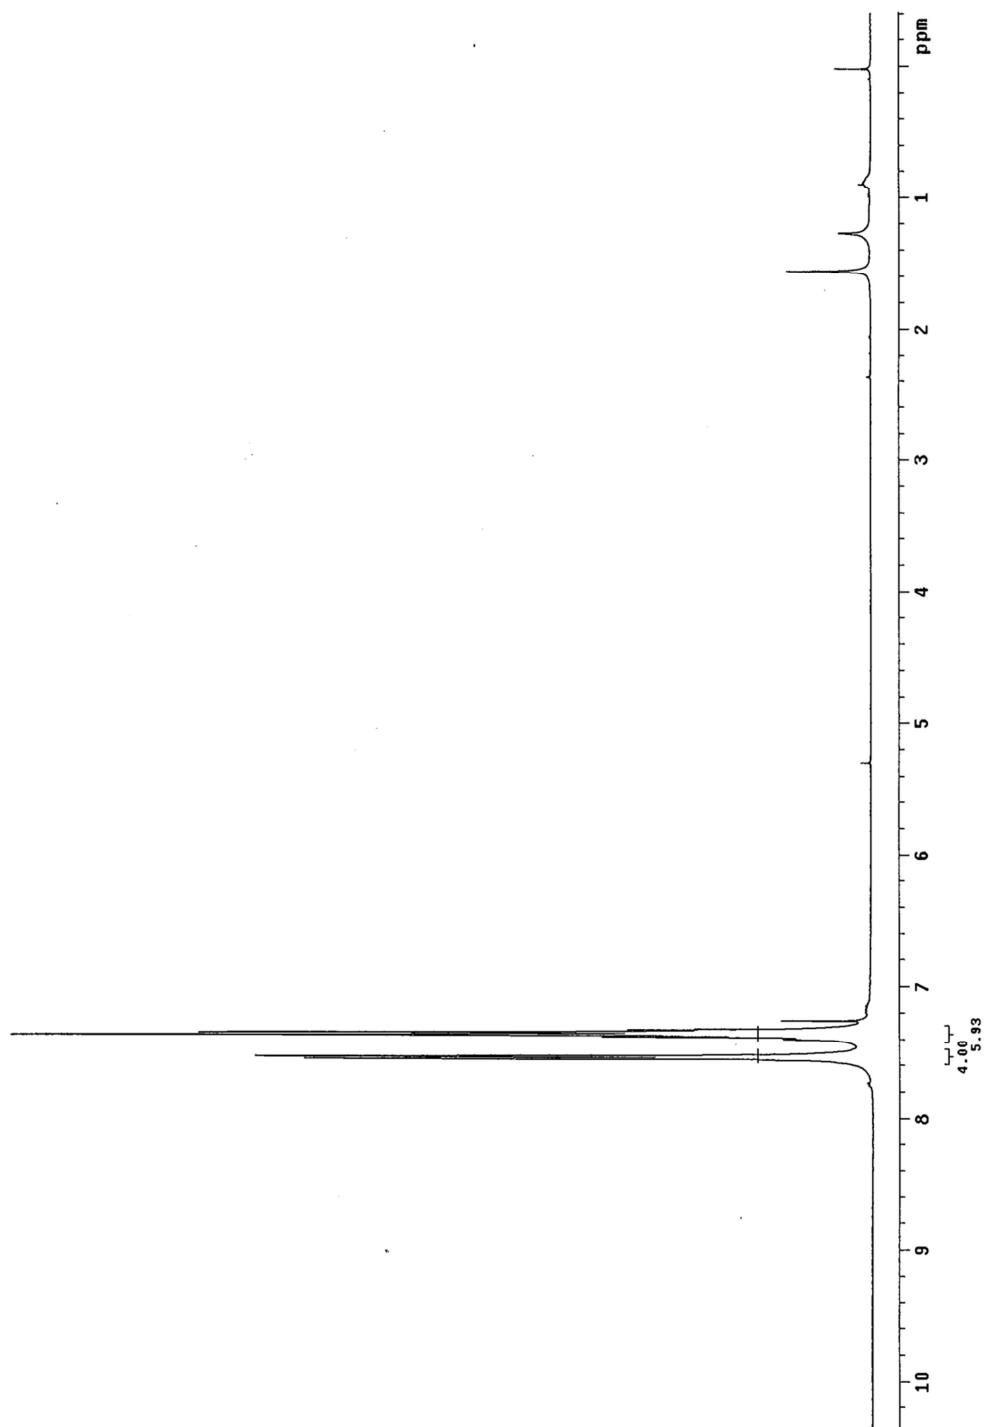



$^{13}\text{C}$  NMR (100 MHz) at 25 °C

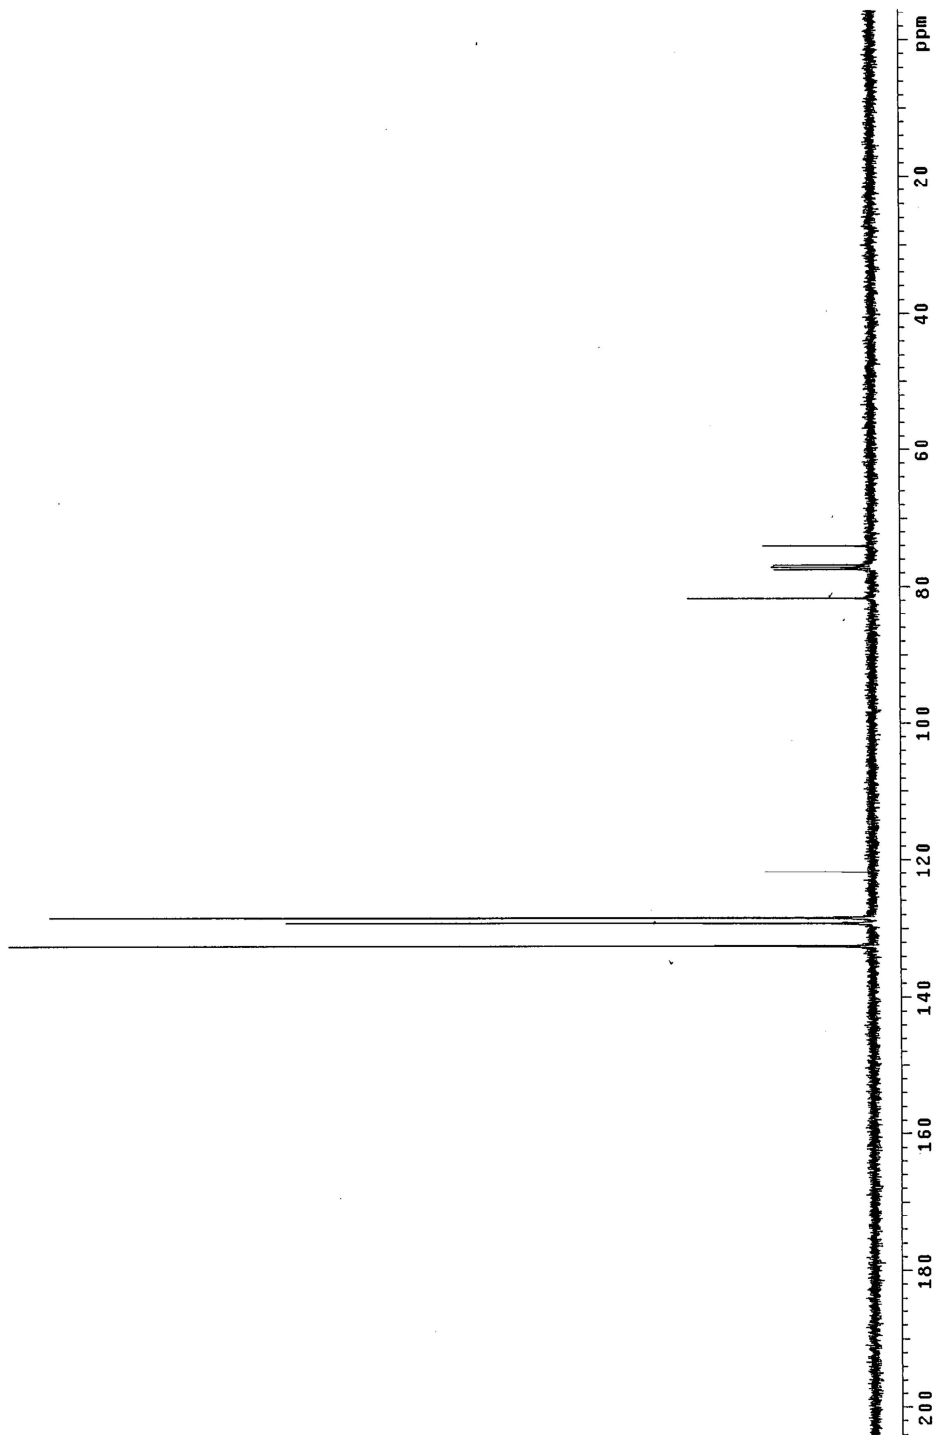

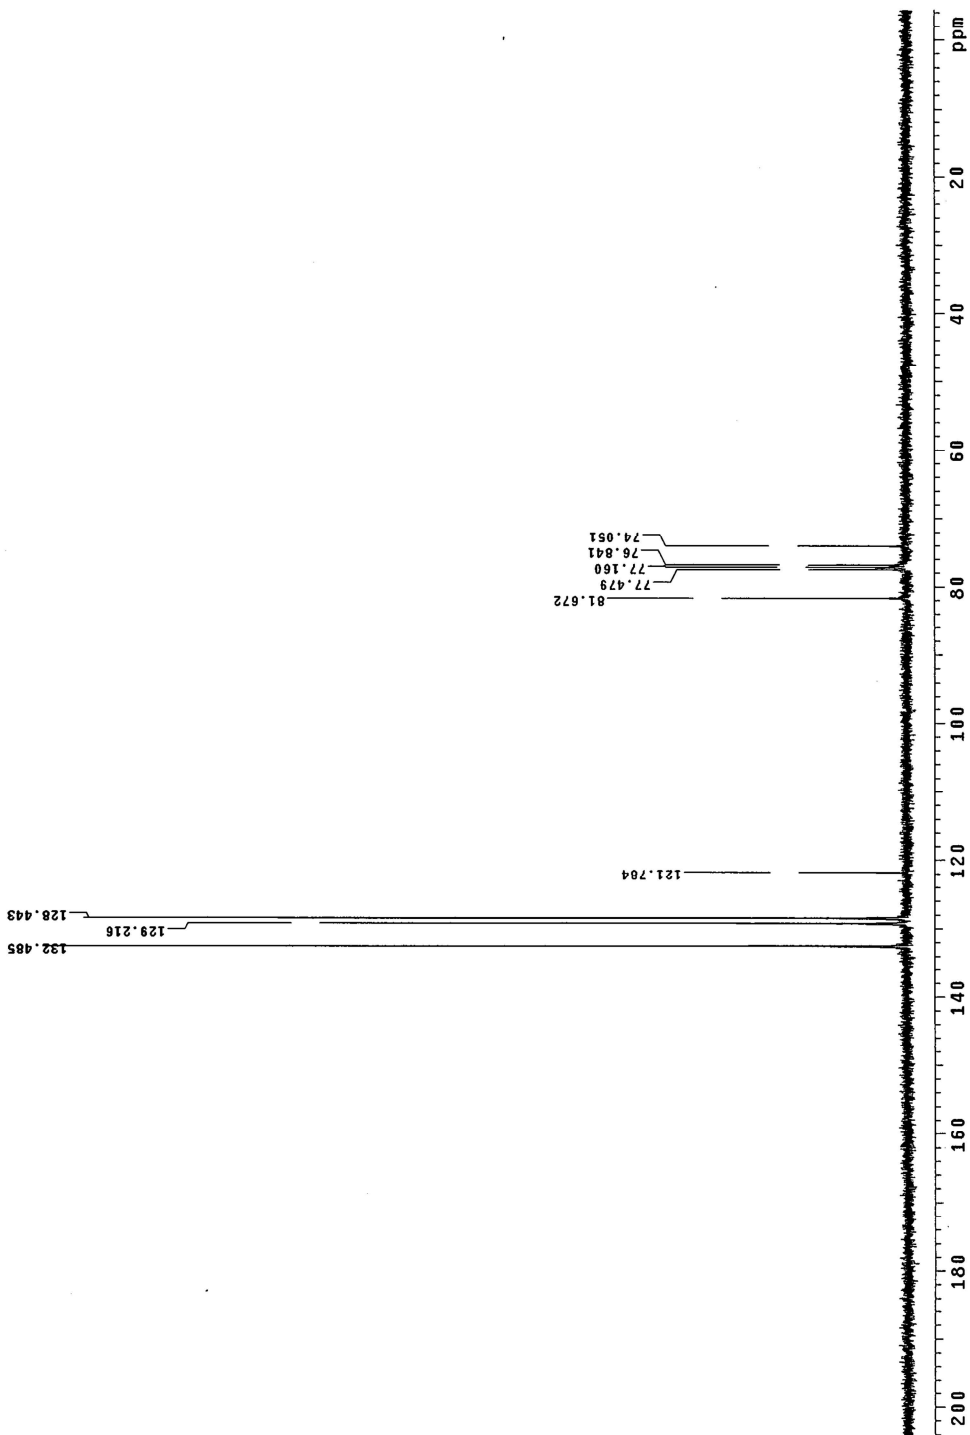

*1,4-bis(4-fluorophenyl)buta-1,3-diyne (2b)*. The general procedure was followed to yield **2b** (39.3 mg, 66 %);  $^1\text{H}$  NMR (500 MHz,  $\text{CDCl}_3$ )  $\delta$  7.51 (m, 4H), 7.04 (m, 4H) ppm;  $^{13}\text{C}$  NMR (125 MHz,  $\text{CDCl}_3$ )  $\delta$  163.3 (d,  $J = 251.3$  Hz), 134.8 (d,  $J = 7.5$  Hz), 118.0 (d,  $J = 3.8$  Hz), 116.1 (d,  $J = 23.8$  Hz), 80.7, 73.8 ppm; IR (neat) 3357, 1643, 1502, 1225, 828  $\text{cm}^{-1}$ ; HRMS (EI+) calcd for  $\text{C}_{16}\text{H}_8\text{F}_2(\text{M}^+)$  208.0594, found 238.0592.

2b / 1H

7.529  
7.524  
7.520  
7.513  
7.510  
7.506  
7.500  
7.495  
7.490  
7.257  
7.059  
7.053  
7.049  
7.040  
7.036  
7.032  
7.023  
7.019

-0.000

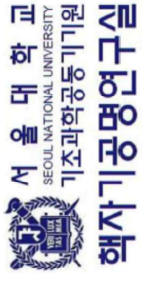

Current Data Parameters  
NAME may22-aju-jhy  
EXPNO 3  
PROCNO 1

F2 - Acquisition Parameter:  
Date\_ 20150522  
Time 16.40  
INSTRUM spect  
PROBHD 5 mm PABBO BB/  
PULPROG zg30  
TD 32768  
SOLVENT CDC13  
NS 32  
DS 4  
SWH 6555.944 Hz  
FIDRES 0.200072 Hz  
AQ 2.4991062 sec  
RG 161  
DW 76.267 usec  
DE 6.50 usec  
TE 298.0 K  
D1 1.00000000 sec  
TD0 1

==== CHANNEL f1 =====  
SFO1 500.1325435 MHZ  
NUC1 1H  
P1 10.20 usec  
PLW1 19.00000000 W

F2 - Processing parameters  
SI 16384  
SF 500.1300144 MHZ  
WDW EM  
SSB 0  
LB 0.30 Hz  
GB 0  
PC 1.00

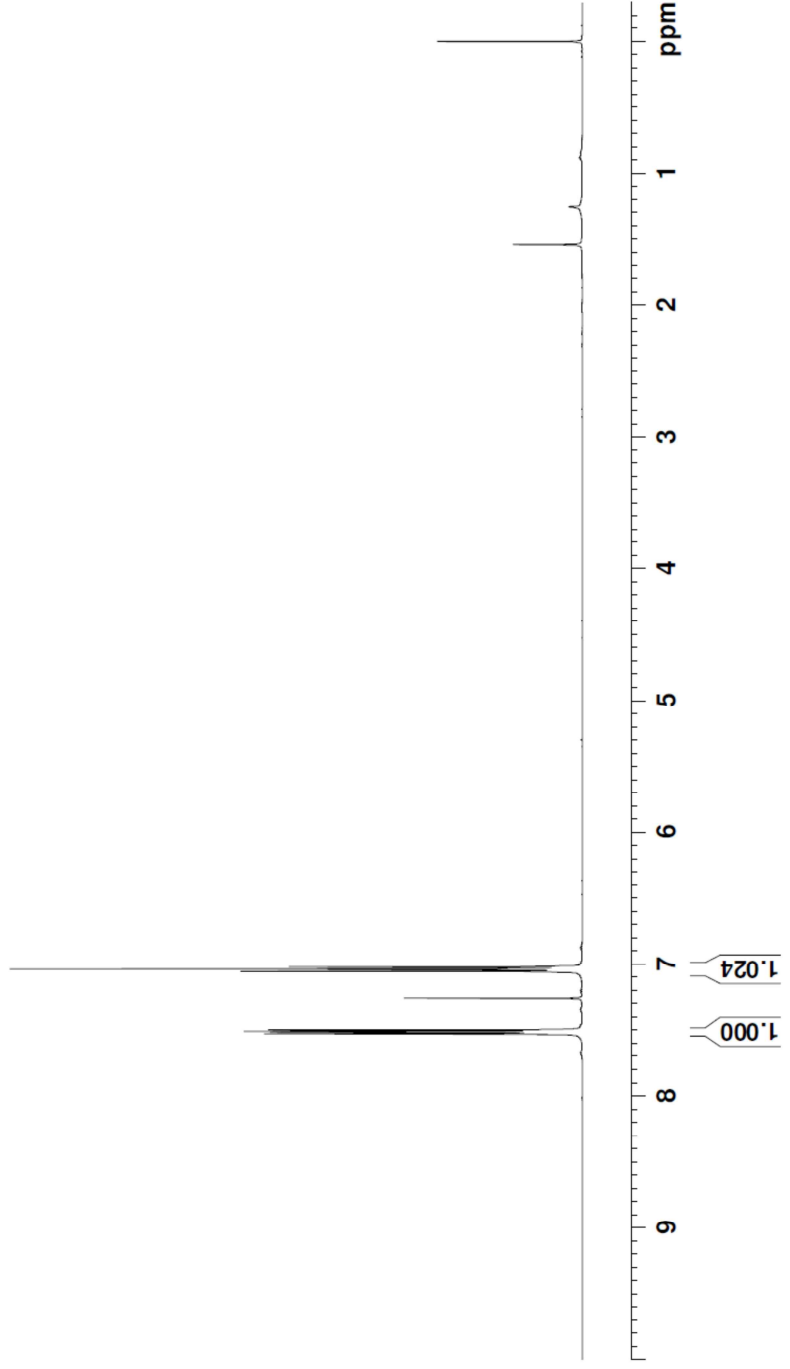

Current Data Parameters  
 NAME may22-aju-jhy  
 EXPNO 4  
 PROCNO 1

F2 - Acquisition Parameters  
 Date\_ 20150522  
 Time 17.04  
 INSTRUM spect  
 PROBHD 5 mm PABBO BB/  
 PULPROG zgdc  
 TD 32768  
 SOLVENT CDCl3  
 NS 640  
 DS 4  
 SWH 29761.904 Hz  
 FIDRES 0.908261 Hz  
 AQ 0.5505024 sec  
 RG 2050  
 DW 16.800 usec  
 DE 6.50 usec  
 TE 298.0 K  
 D1 2.00000000 sec  
 D11 0.03000000 sec  
 TD0 1

===== CHANNEL f1 =====  
 SFO1 125.770936 MHz  
 NUC1 13C  
 P1 10.00 usec  
 PLW1 90.00000000 W

===== CHANNEL f2 =====  
 SFO2 500.1320005 MHz  
 NUC2 1H  
 CPDPRG[2] waltz16  
 FCPD2 80.00 usec  
 PLW2 19.00000000 W  
 PLW12 0.30886999 W

F2 - Processing parameters  
 SI 16384  
 SF 125.7577618 MHz  
 WDW EM  
 SSB 0  
 LB 1.00 Hz  
 GB 0  
 FC 1.40

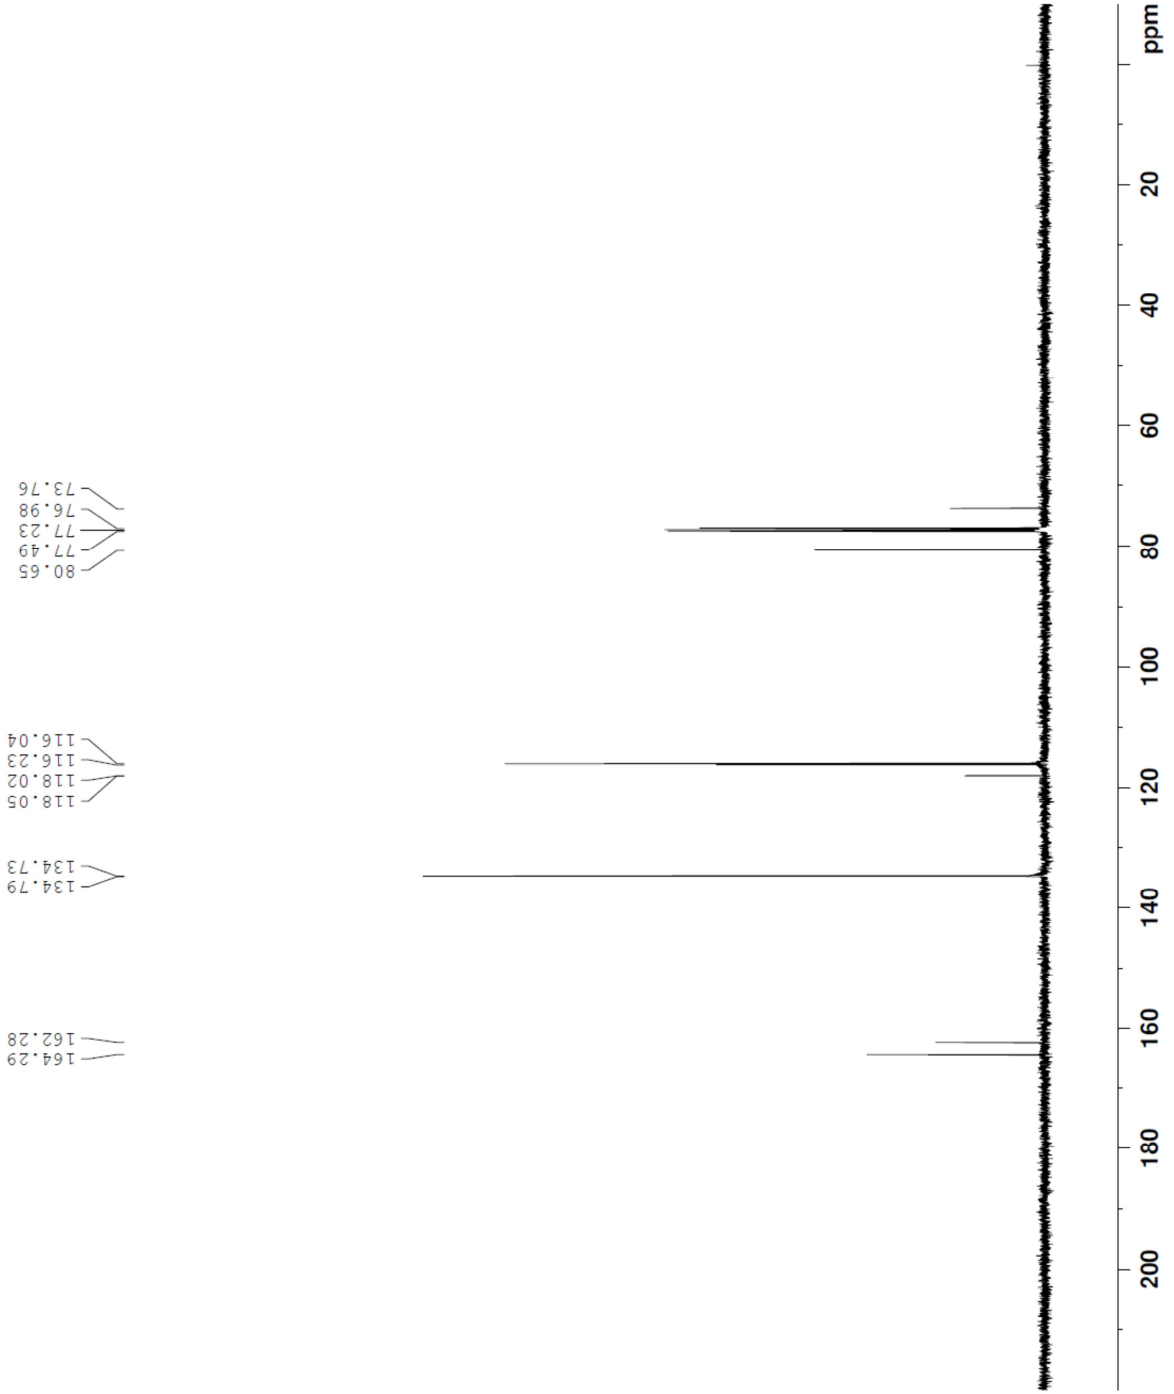

*1,4-bis(4-methoxyphenyl)buta-1,3-diyne (3b)*. The general procedure was followed to yield **3b** (44.7 mg, 68 %); <sup>1</sup>H NMR (400 MHz, CDCl<sub>3</sub>) δ 7.46 (d, 4H, *J* = 8.8 Hz), 6.86 (d, 4H, *J* = 8.8 Hz), 3.82 (s, 6H) ppm; <sup>13</sup>C NMR (100 MHz, CDCl<sub>3</sub>) δ 160.2, 134.0, 114.2, 114.1, 114.0, 81.4, 73.1, 55.5 ppm; IR (neat) 3484, 1599, 1264, 742 cm<sup>-1</sup>; HRMS (EI+) calcd for C<sub>18</sub>H<sub>14</sub>O<sub>2</sub>(M<sup>+</sup>) 262.0994, found 262.0992.

$^1\text{H}$  NMR (400 MHz) at 25 °C

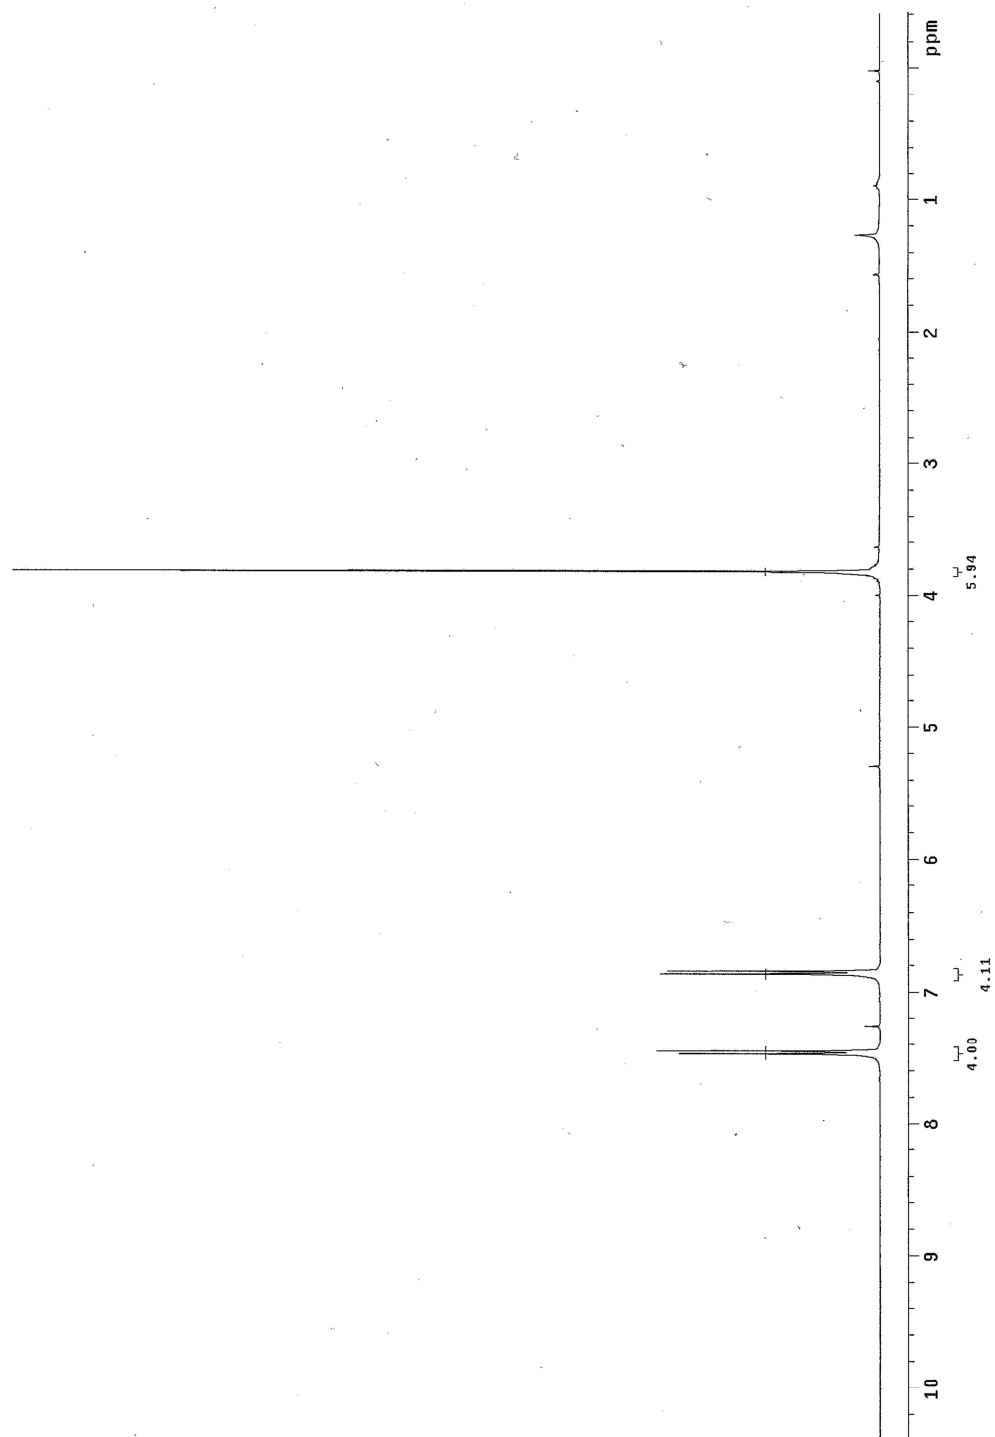

$^{13}\text{C}$  NMR (100 MHz) at 25 °C

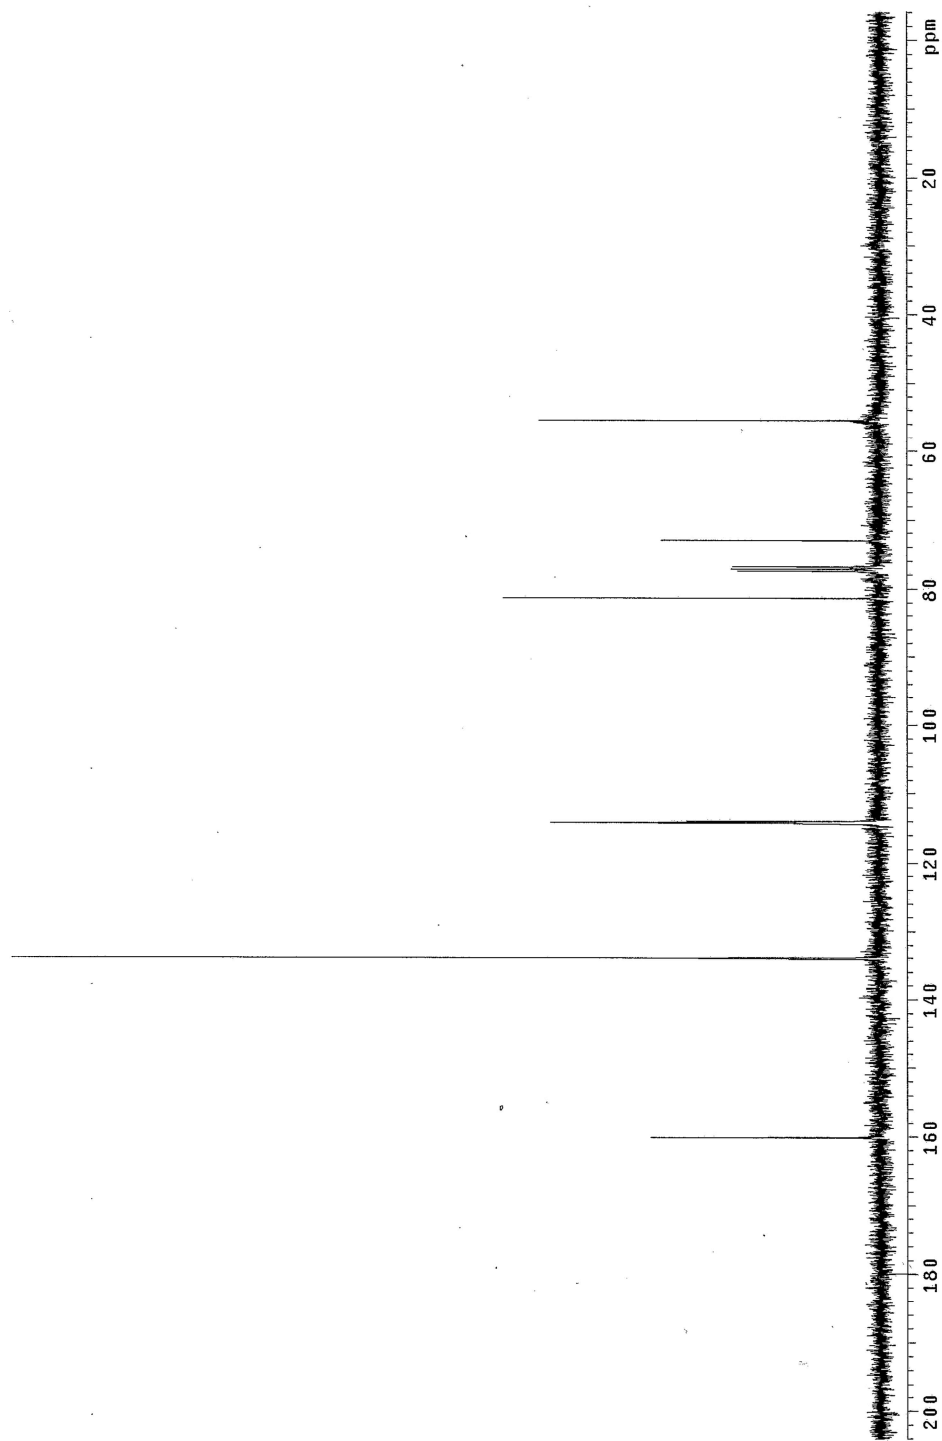



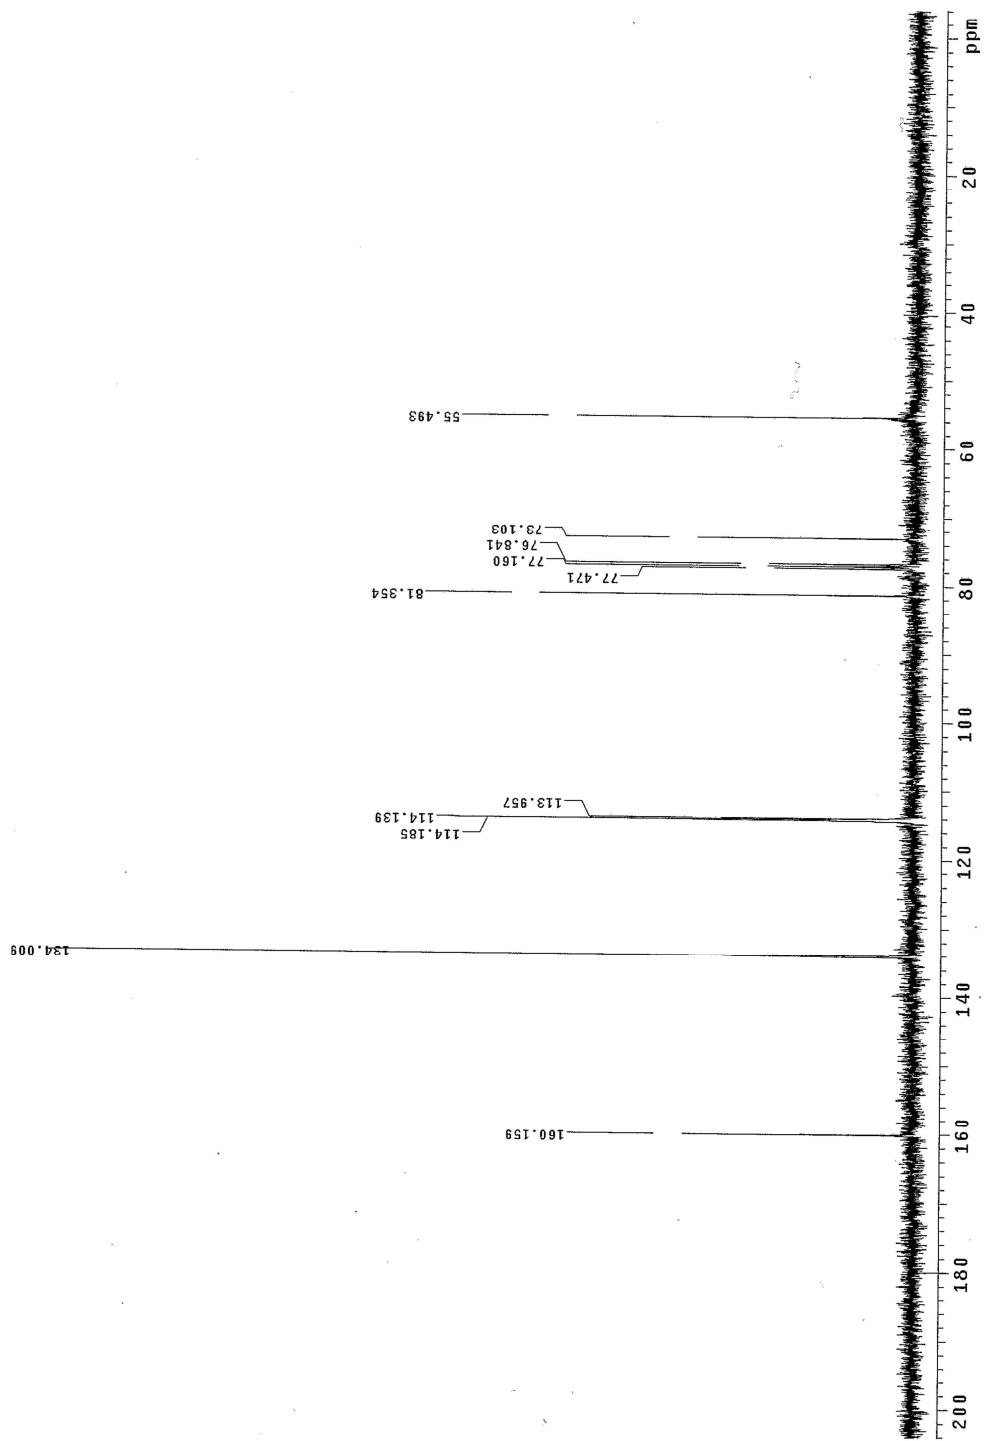

*1,4-dip-tolybuta-1,3-diyne (4b)*. The general procedure was followed to yield **4b** (43.1 mg, 75 %); <sup>1</sup>H NMR (400 MHz, CDCl<sub>3</sub>) δ 7.43 (d, 4H, *J* = 8.0 Hz), 7.15 (d, 4H, *J* = 8.0 Hz), 2.37 (s, 6H) ppm; <sup>13</sup>C NMR (100 MHz, CDCl<sub>3</sub>) δ 139.5, 132.4, 129.2, 118.8, 81.7, 73.6, 21.9 ppm; IR (neat) 3382, 1636, 1504, 810 cm<sup>-1</sup>; HRMS (EI+) calcd for C<sub>18</sub>H<sub>10</sub>(M<sup>+</sup>) 230.1096, found 230.1095

$^1\text{H}$  NMR (400 MHz) at 25 °C

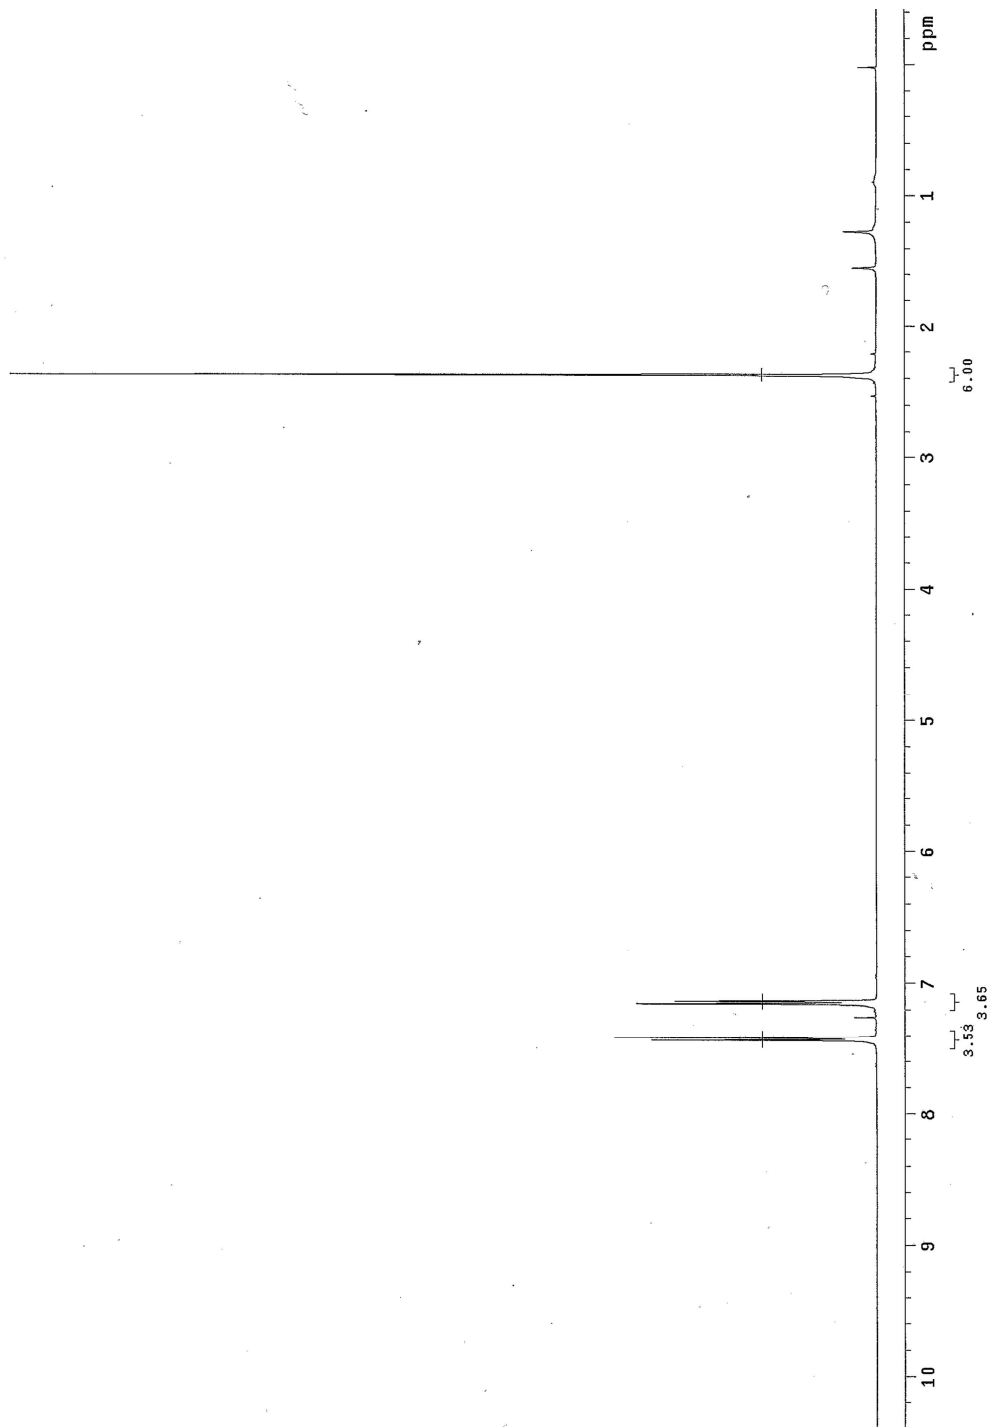

$^{13}\text{C}$  NMR (100 MHz) at 25 °C

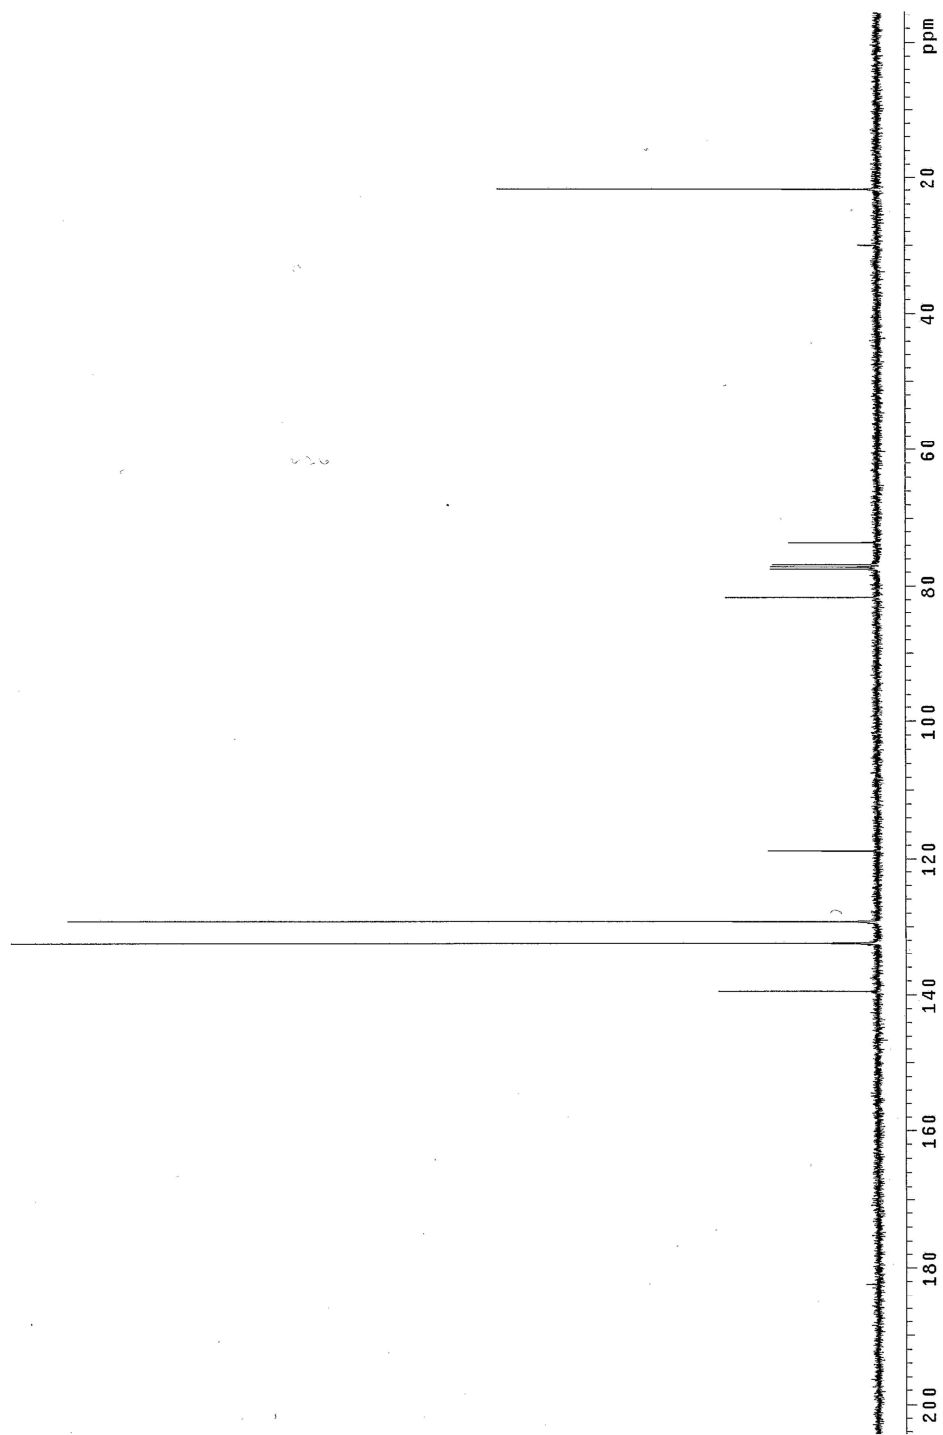

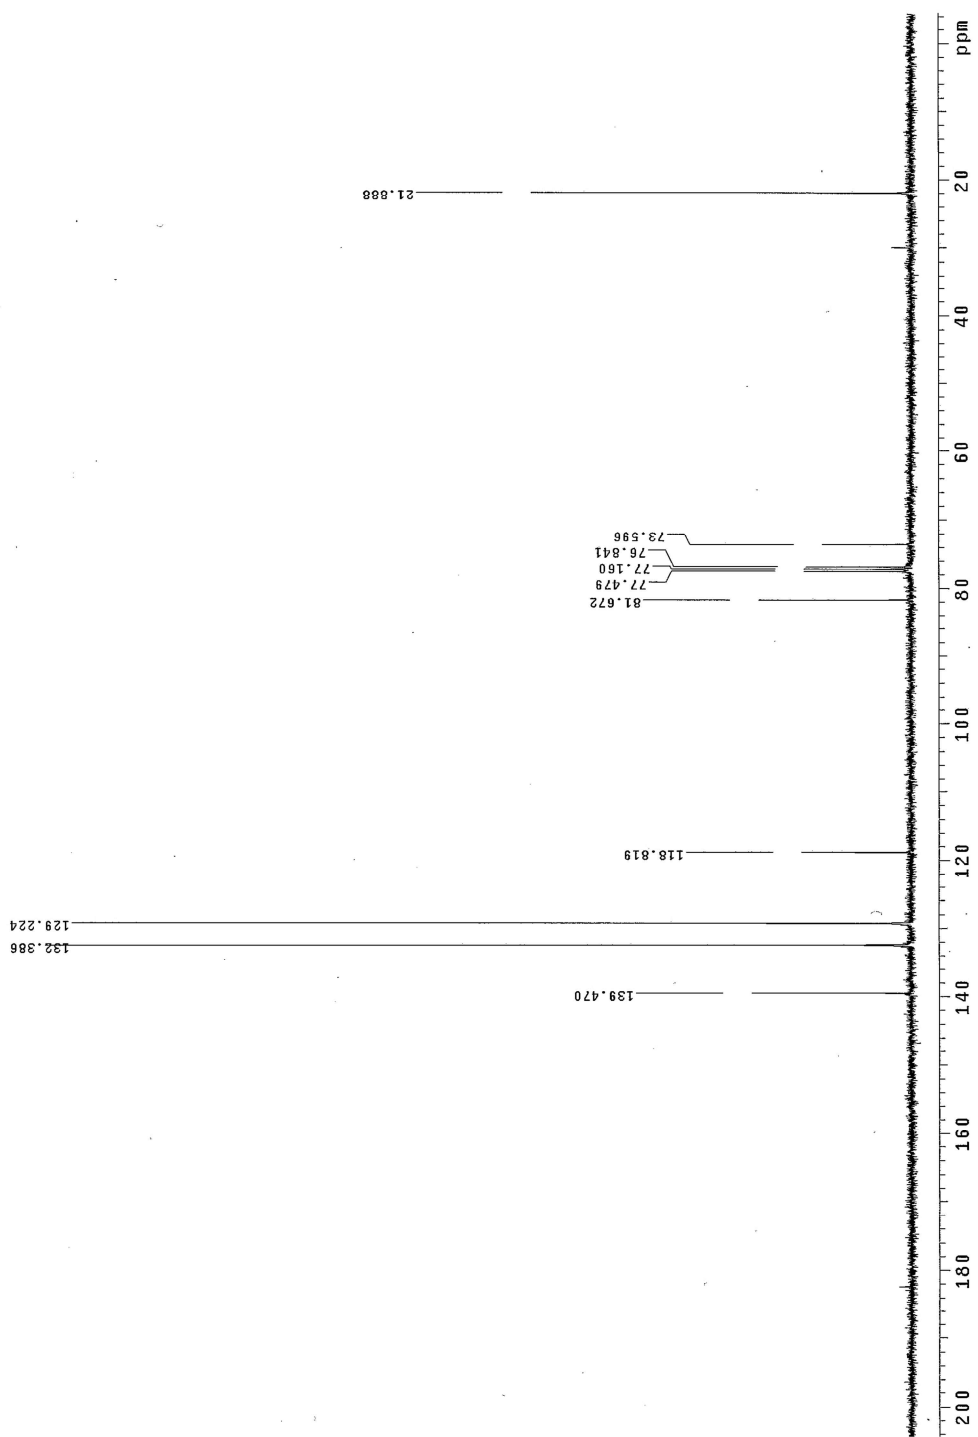

*1,4-bis(4-heptylphenyl)buta-1,3-diyne (5b)*. The general procedure was followed to yield **5b** (46.1 mg, 75 %);  $^1\text{H}$  NMR (400 MHz,  $\text{CDCl}_3$ )  $\delta$  2.24 (t, 4H,  $J = 6.8$  Hz), 1.52 (m, 4H), 1.36 (m, 4H), 1.29 (m, 12H), 0.88 (t, 6H,  $J = 6.4$  Hz) ppm;  $^{13}\text{C}$  NMR (100 MHz,  $\text{CDCl}_3$ )  $\delta$  76.8, 65.4, 32.0, 29.1, 29.0, 28.6, 22.9, 19.5, 14.4 ppm; IR (neat) 3447, 2955, 2929, 1652, 1465  $\text{cm}^{-1}$ ; HRMS (EI+) calcd for  $\text{C}_{18}\text{H}_{30}(\text{M}^+)$  246.2348, found 246.2346.

$^1\text{H}$  NMR (400 MHz) at 25 °C

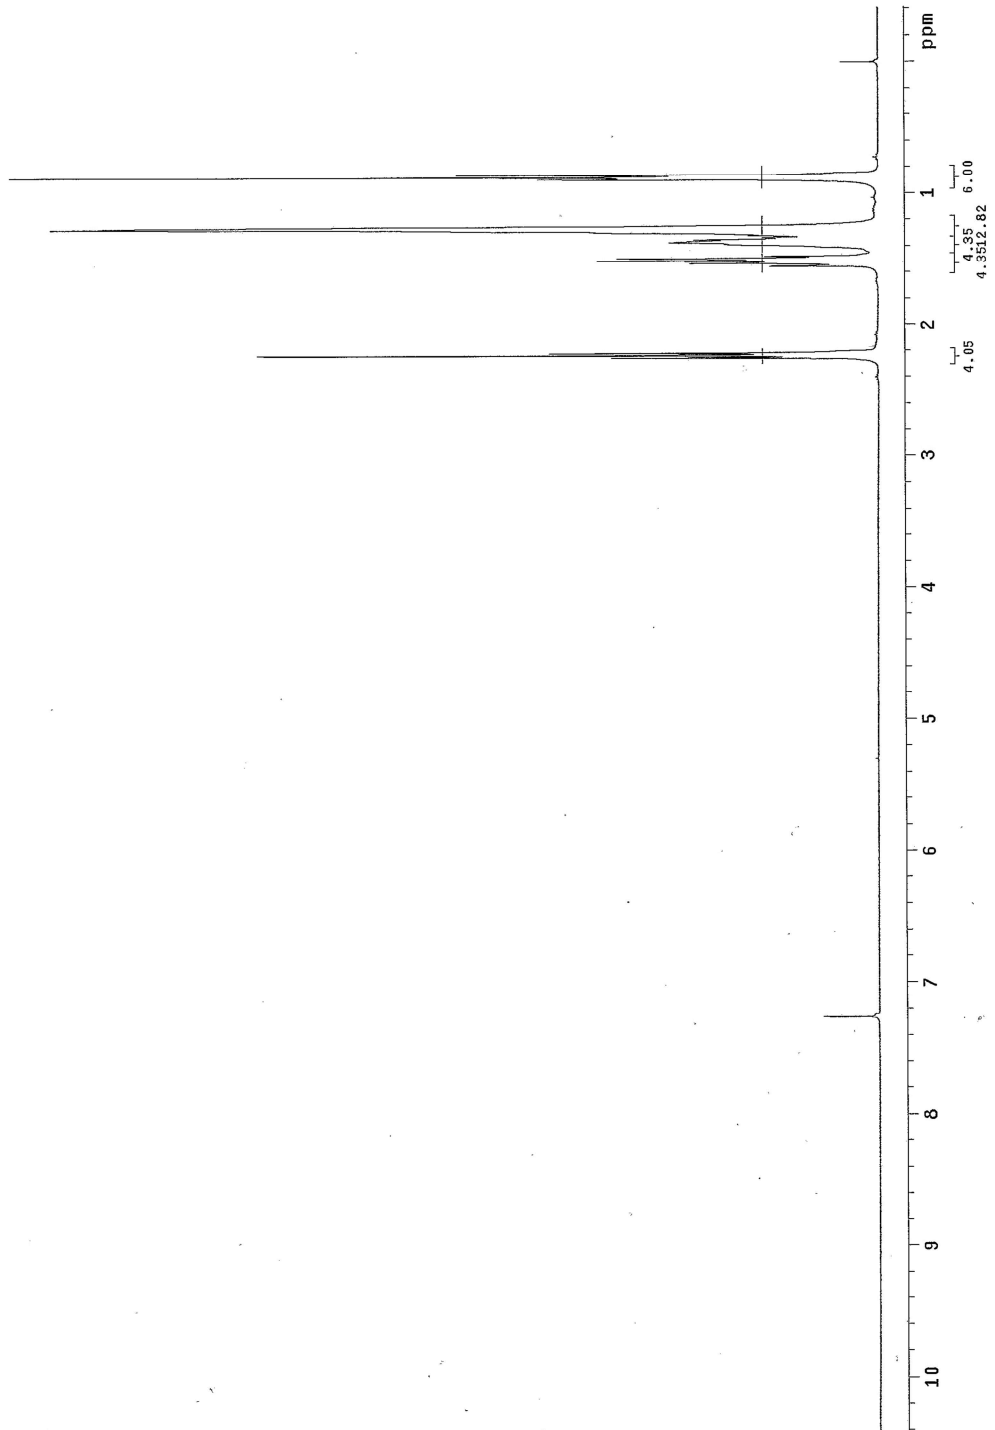

$^{13}\text{C}$  NMR (100 MHz) at 25 °C

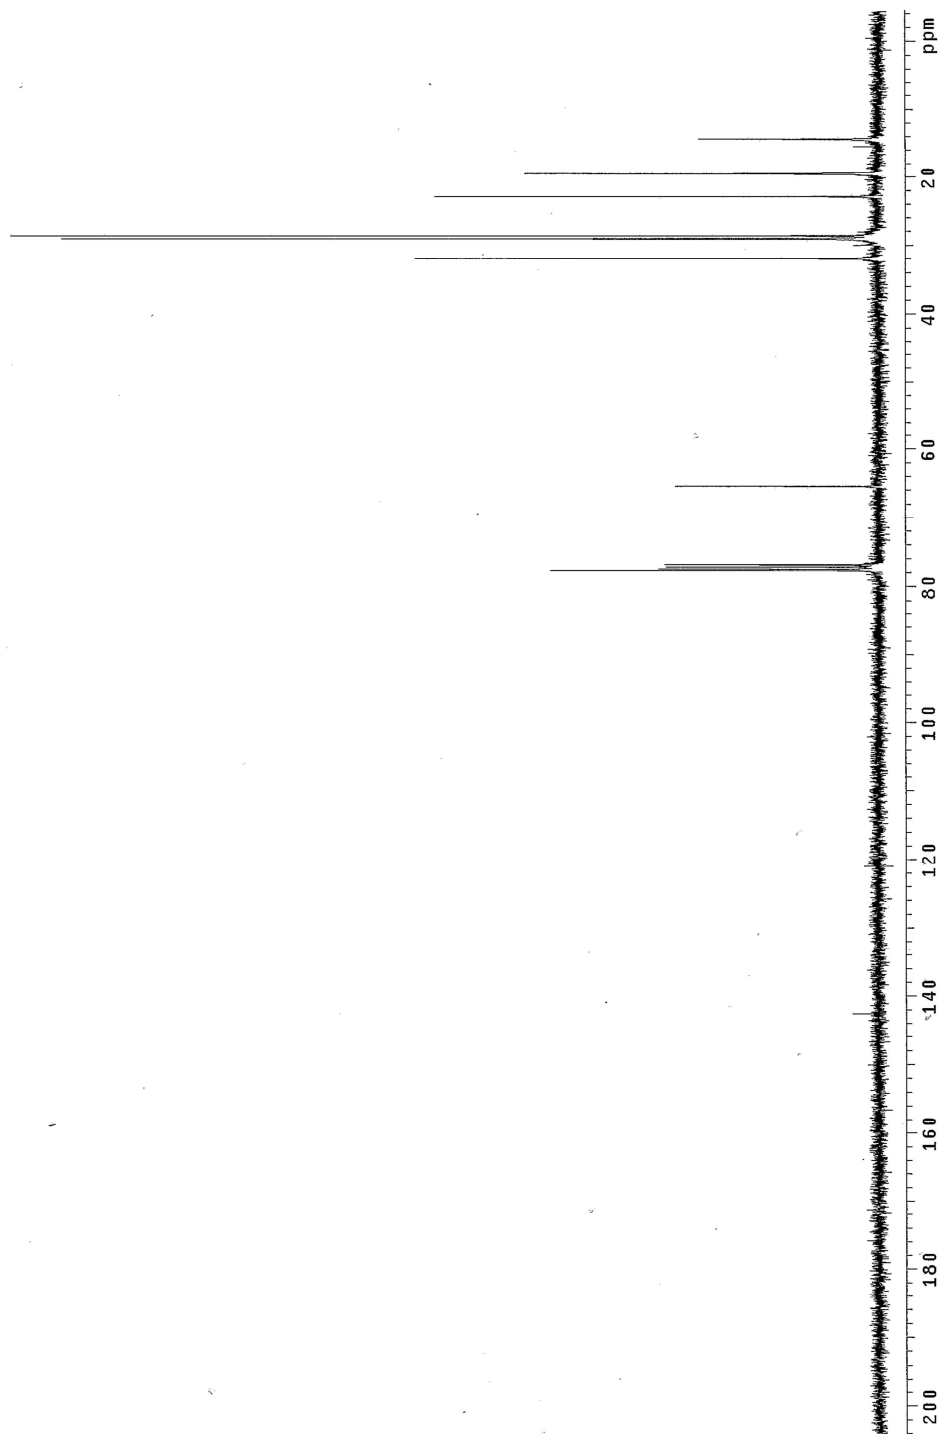



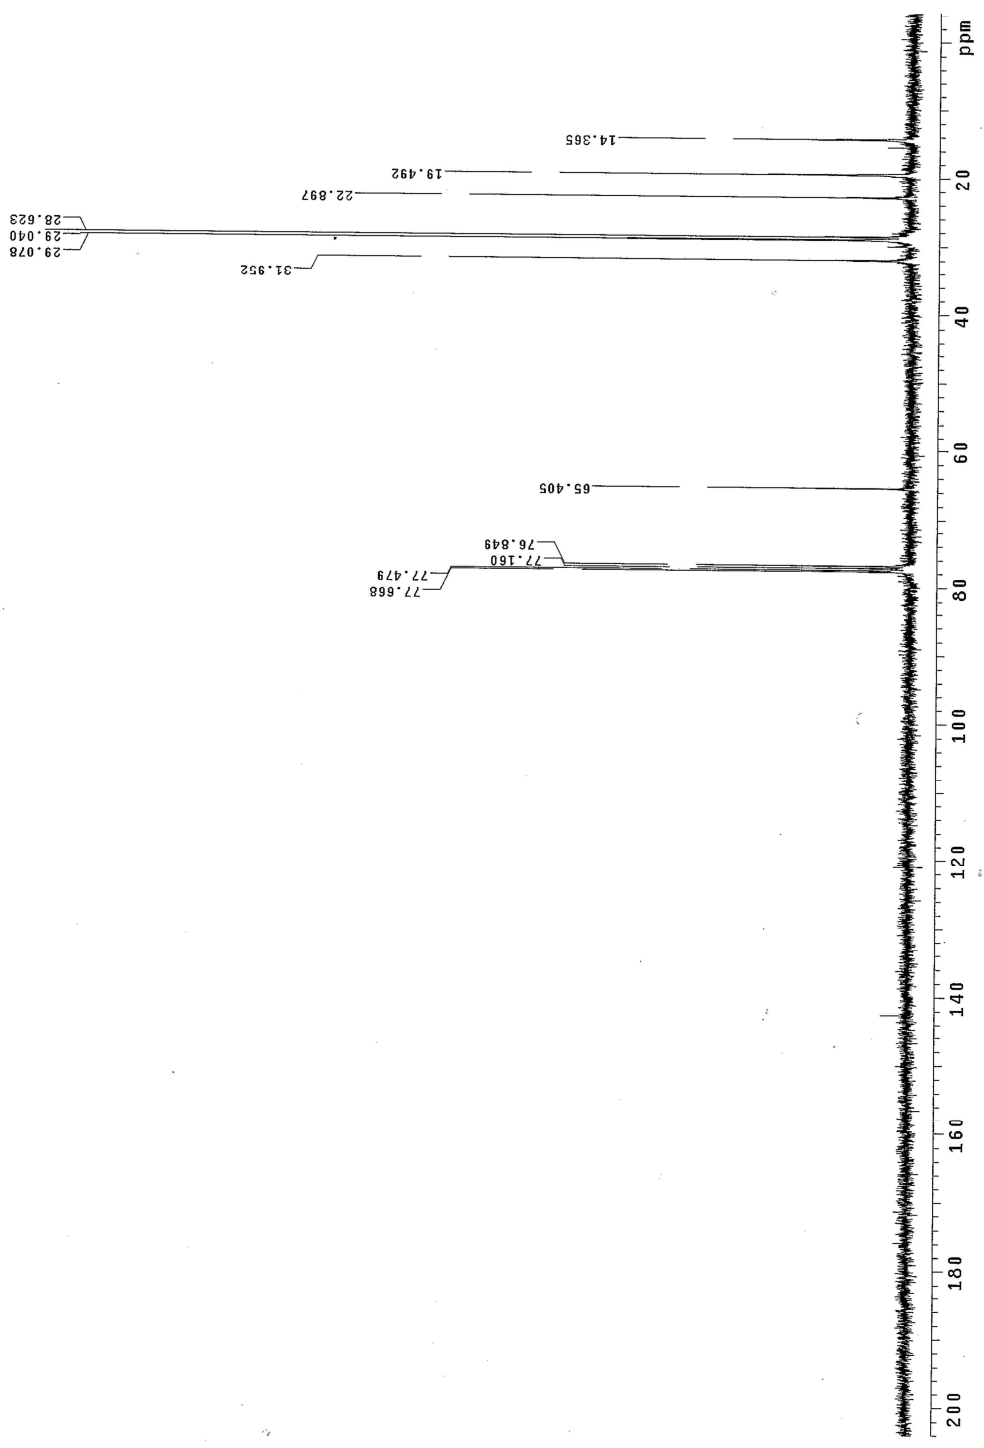

*1,4-dicyclohexylbuta-1,3-diyne (6b)*. The general procedure was followed to yield **6b** (29.6 mg, 55 %);  $^1\text{H}$  NMR (500 MHz,  $\text{CDCl}_3$ )  $\delta$  2.43 (m, 2H), 1.79 (m, 4H), 1.70 (m, 4H), 1.48 (m, 6H), 1.29 (m, 6H) ppm;  $^{13}\text{C}$  NMR (125 MHz,  $\text{CDCl}_3$ )  $\delta$  82.1, 65.3, 32.5, 29.7, 26.0, 25.0 ppm; IR (neat) 2929, 2344, 1448, 750  $\text{cm}^{-1}$ ; HRMS (EI+) calcd for  $\text{C}_{16}\text{H}_{10}(\text{M}^+)$  214.1722, found 214.1721.

6b / 1H

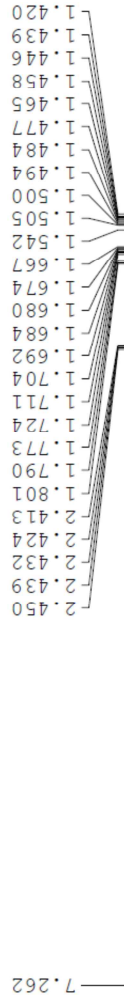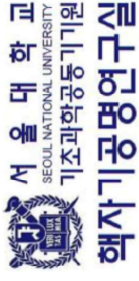

Current Data Parameters  
NAME may22-aju-jhy  
EXPNO 1  
PROCNO 1

F2 - Acquisition Parameter:  
Date\_ 20150522  
Time 16.27  
INSTRUM spect  
PROBHD 5 mm PABBO BB/  
PULPROG zg30  
TD 32768  
SOLVENT CDC13  
NS 32  
DS 4  
SWH 6487.889 Hz  
FIDRES 0.197995 Hz  
AQ 2.5253205 sec  
RG 80.6  
DW 77.067 usec  
DE 6.50 usec  
TE 298.0 K  
D1 1.00000000 sec  
TD0 1

==== CHANNEL f1 =====  
SFO1 500.1325092 MHz  
NUC1 1H  
P1 10.20 usec  
PLW1 19.00000000 W

F2 - Processing parameters  
SI 16384  
SF 500.1300119 MHz  
WDW EM  
SSB 0  
LB 0.30 Hz  
GB 0  
PC 1.00

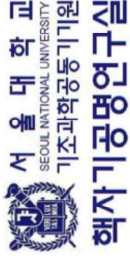

Current Data Parameters  
 NAME may22-aju-jhy  
 EXPNO 2  
 PROCNO 1

F2 - Acquisition Parameters  
 Date\_ 20150522  
 Time 16.29  
 INSTRUM spect  
 PROHD 5 mm PABBO BB/  
 PULPROG zgdc  
 TD 32768  
 SOLVENT CDC13  
 NS 128  
 DS 4  
 SWH 29761.904 Hz  
 FIDRES 0.908261 Hz  
 AQ 0.5505024 sec  
 RG 2050  
 DW 16.800 usec  
 DE 6.50 usec  
 TE 298.0 K  
 D1 2.00000000 sec  
 D11 0.03000000 sec  
 TD0 1

==== CHANNEL f1 =====  
 SF01 125.7709936 MHz  
 NUC1 13C  
 P1 10.00 usec  
 PLW1 90.00000000 W  
 =====  
 CHANNEL f2 =====  
 SF02 500.1320005 MHz  
 NUC2 1H  
 CPDPRG12 waltz16  
 PCPD2 80.00 usec  
 PLW2 19.00000000 W  
 PLW12 0.30886999 W

F2 - Processing parameters  
 SI 16384  
 SF 125.7577617 MHz  
 WDW EM  
 SSB 0  
 LB 1.00 Hz  
 GB 0  
 FC 1.40

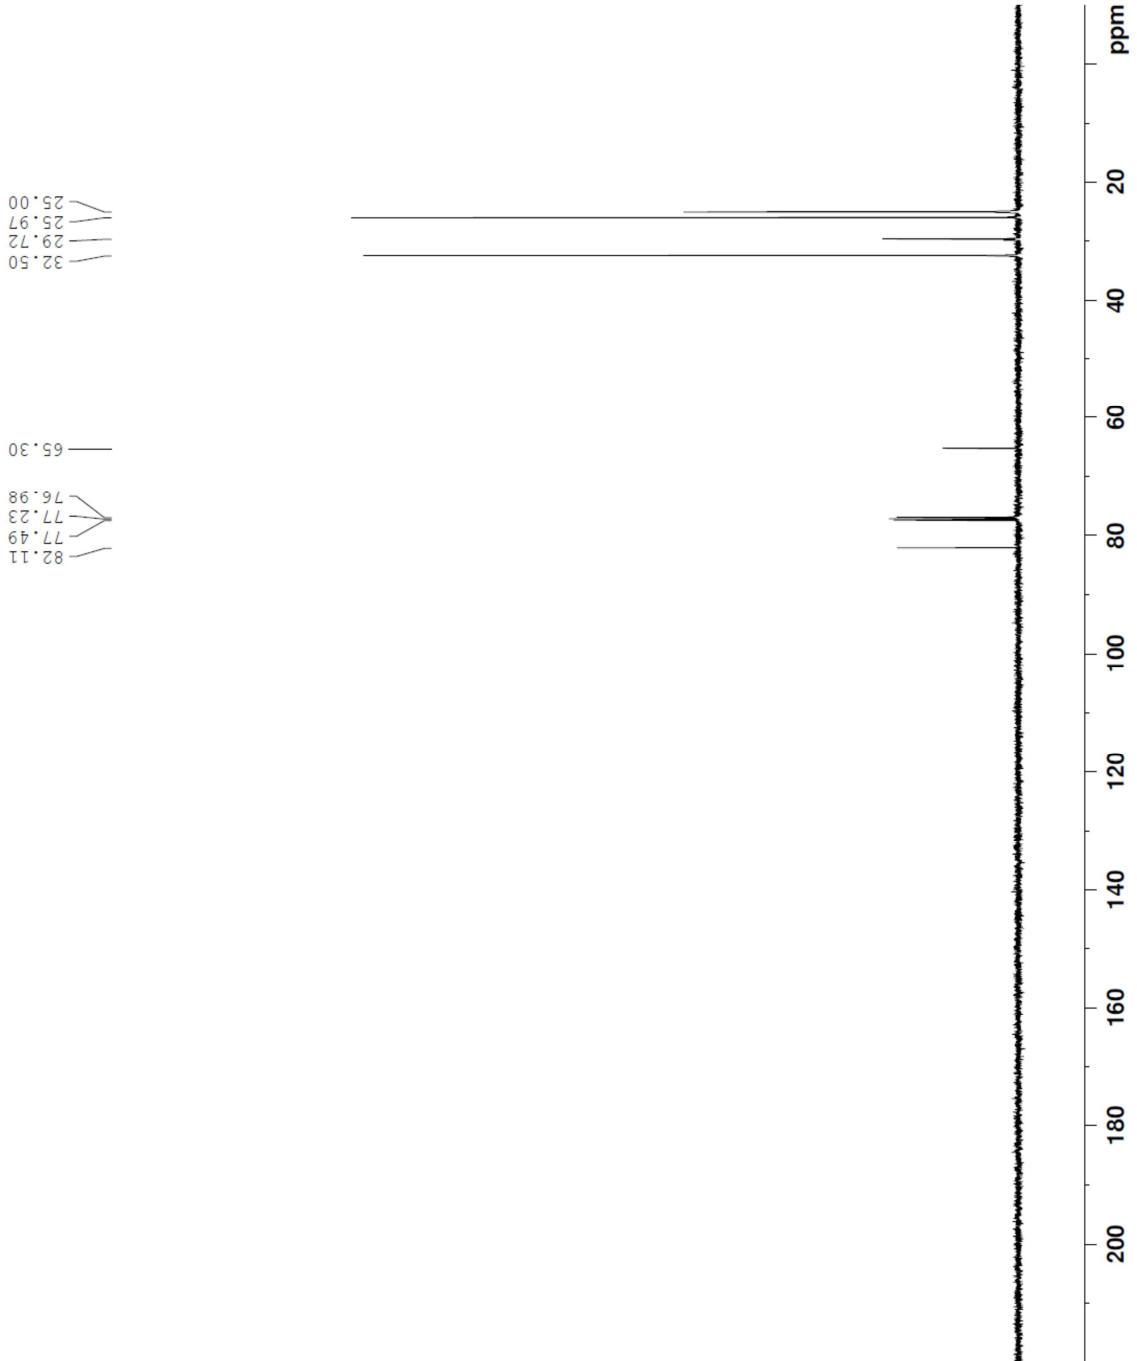

*1-benzyl-4-m-tolyl-1H-1,2,3-triazole* (Table 2, 1d). The representative procedure was followed to yield **1d** (100.4mg, 85%); <sup>1</sup>H NMR (400 MHz, CDCl<sub>3</sub>) δ 7.80 (m, 2H), 7.68 (s, 1H), 7.38 (m, 5H), 7.31 (m, 3H), 5.54 (s, 2H) ppm; <sup>13</sup>C NMR (100 MHz, CDCl<sub>3</sub>) δ 148.0, 134.6, 130.5, 129.0, 128.7 (2C), 128.1, 128.0, 125.6, 119.5, 54.3 ppm; IR (neat) 3091, 2360, 1600, 1496, 1223 cm<sup>-1</sup>; HRMS (EI+) caclcd for C<sub>15</sub>H<sub>13</sub>N<sub>3</sub> (M<sup>+</sup>) 235.1109, found 235.1108.

$^1\text{H}$  NMR (400 MHz) at 25 °C

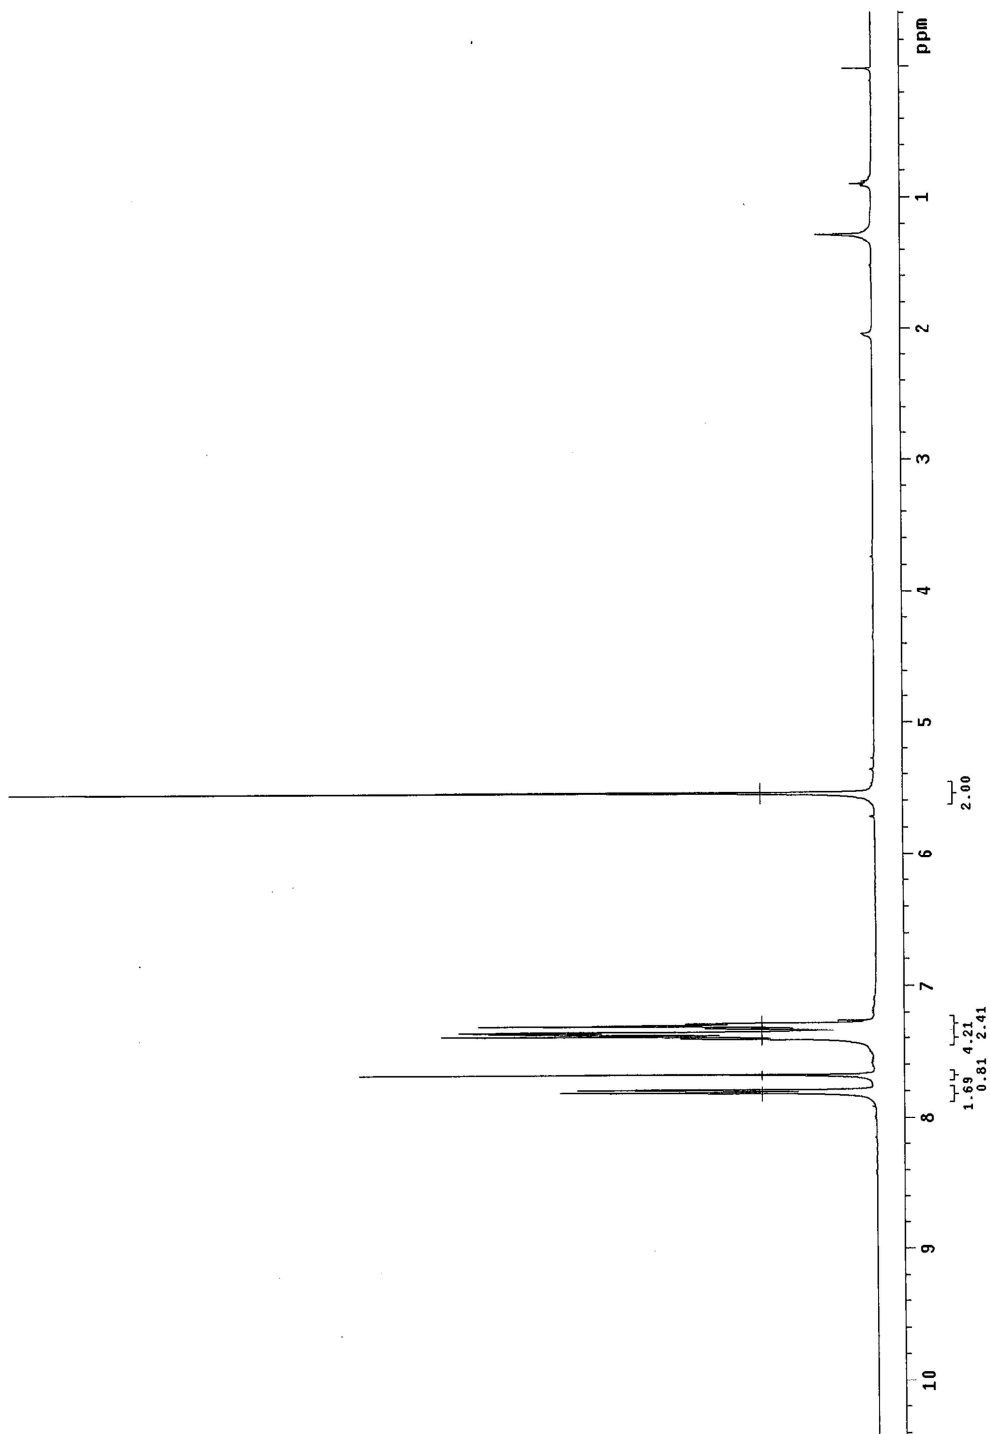

$^{13}\text{C}$  NMR (100 MHz) at 25 °C

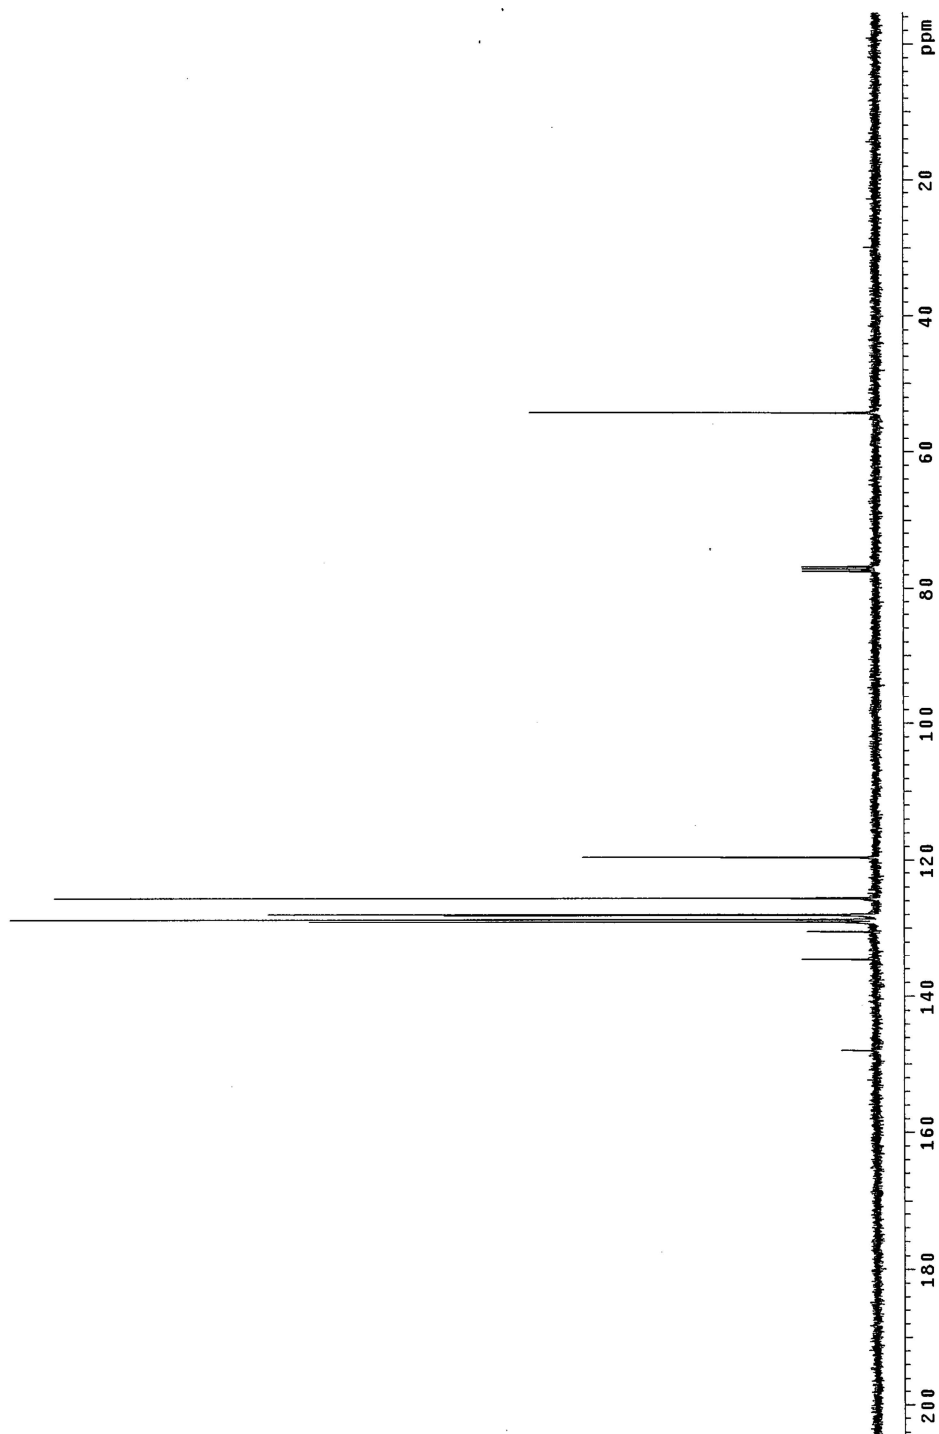

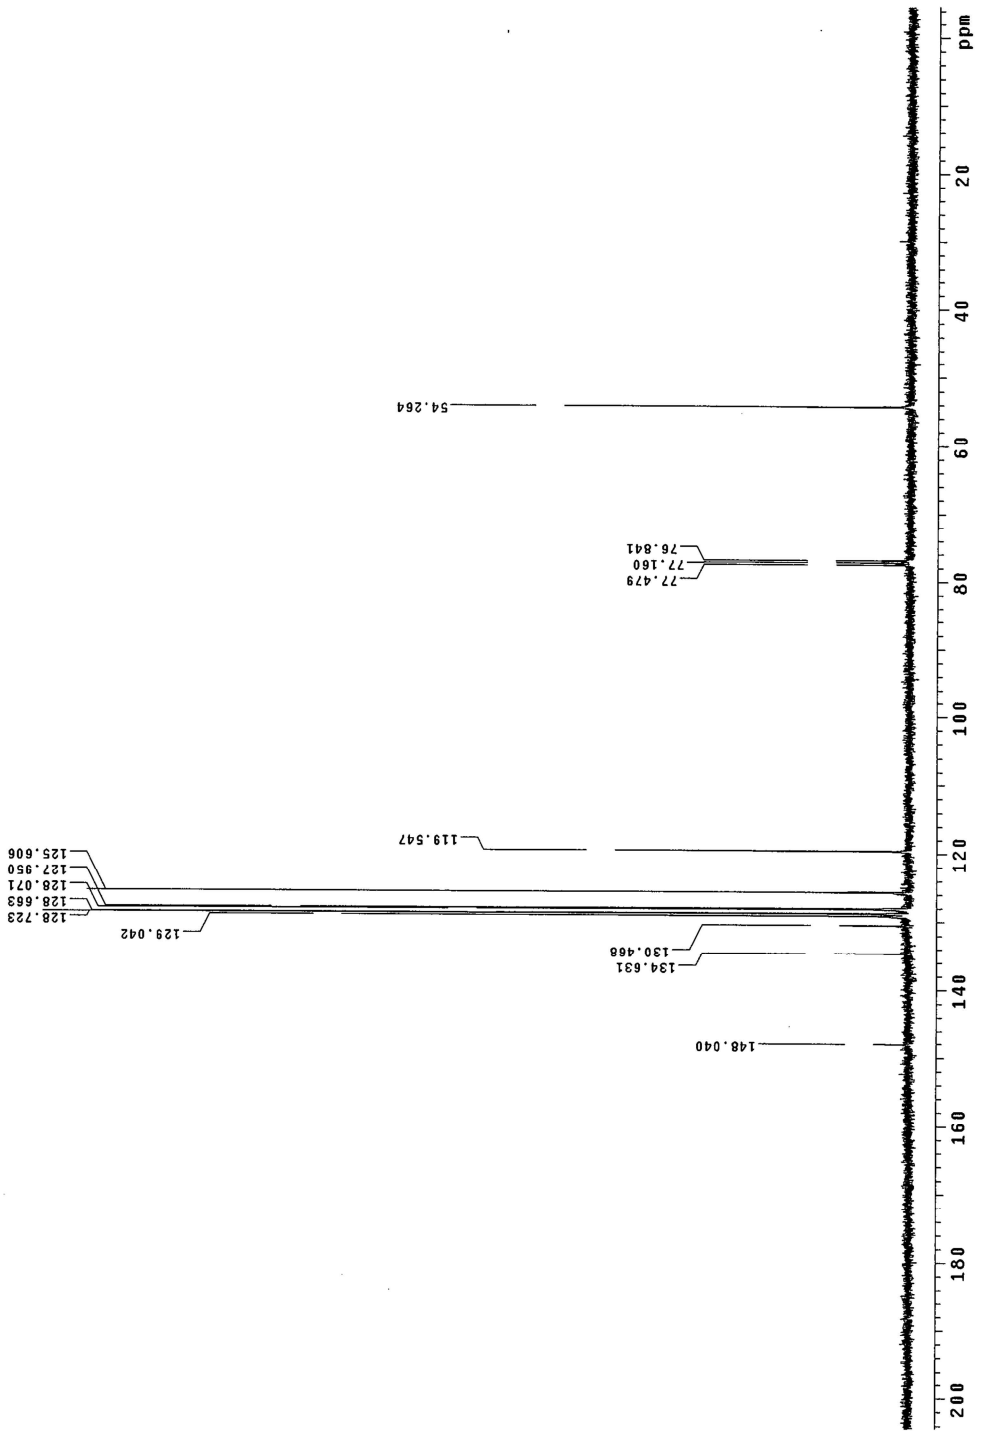



*1-benzyl-5-phenyl-1H-1,2,3-triazole* (Scheme 3, *1d'*). <sup>1</sup>H NMR (400 MHz, CDCl<sub>3</sub>) 1d+1d' (major : minor = 2:1) δ 7.80 (m, 2H, major), 7.73 (s, 1H, minor), 7.68 (s, 1H, major), 7.43 - 7.23 (m, 16H, major : minor = 2:1), 7.06 (m, 2H, minor), 5.55 (s, 2H, major), 5.53 (s, 2H, minor) ppm; <sup>13</sup>C NMR (100 MHz, CDCl<sub>3</sub>) δ 148.1, 135.4, 134.6, 133.2, 130.5, 129.4, 129.1, 128.9, 128.8 (2C), 128.7 (2C), 128.1, 128.0, 127.1, 126.8, 125.6, 119.5, 54.3, 51.9 ppm; IR (neat) 3122, 2360, 1606, 1497, 1207 cm<sup>-1</sup>; HRMS (EI+) calcd for C<sub>15</sub>H<sub>13</sub>N<sub>3</sub> (M<sup>+</sup>) 235.1109, found 235.1108.

$^1\text{H}$  NMR (400 MHz) at 25 °C

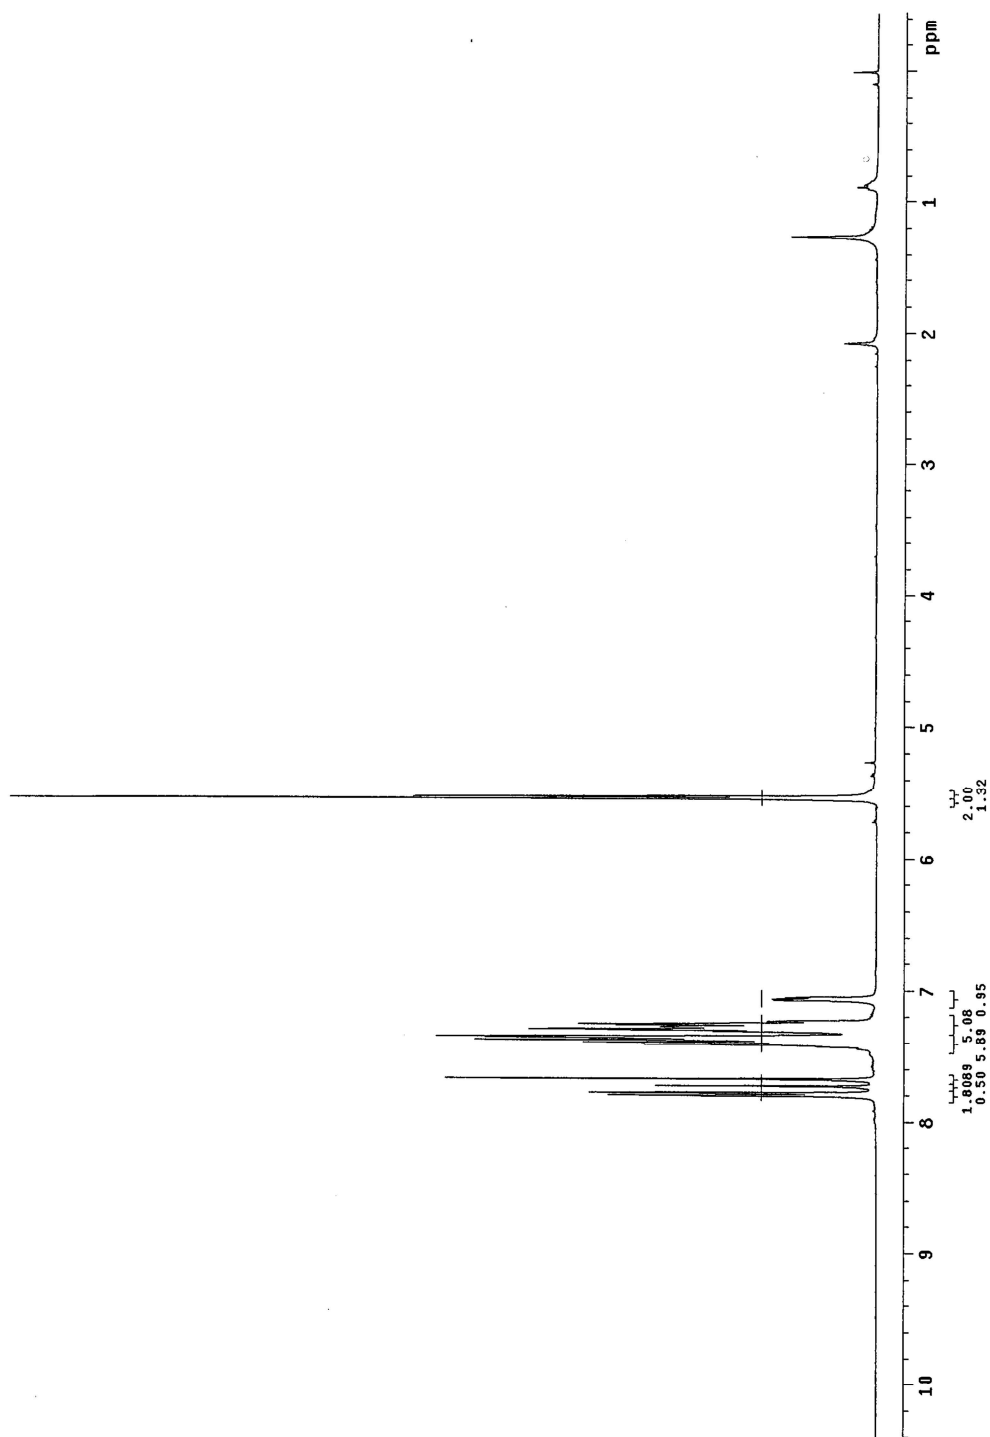

$^{13}\text{C}$  NMR (100 MHz) at 25 °C

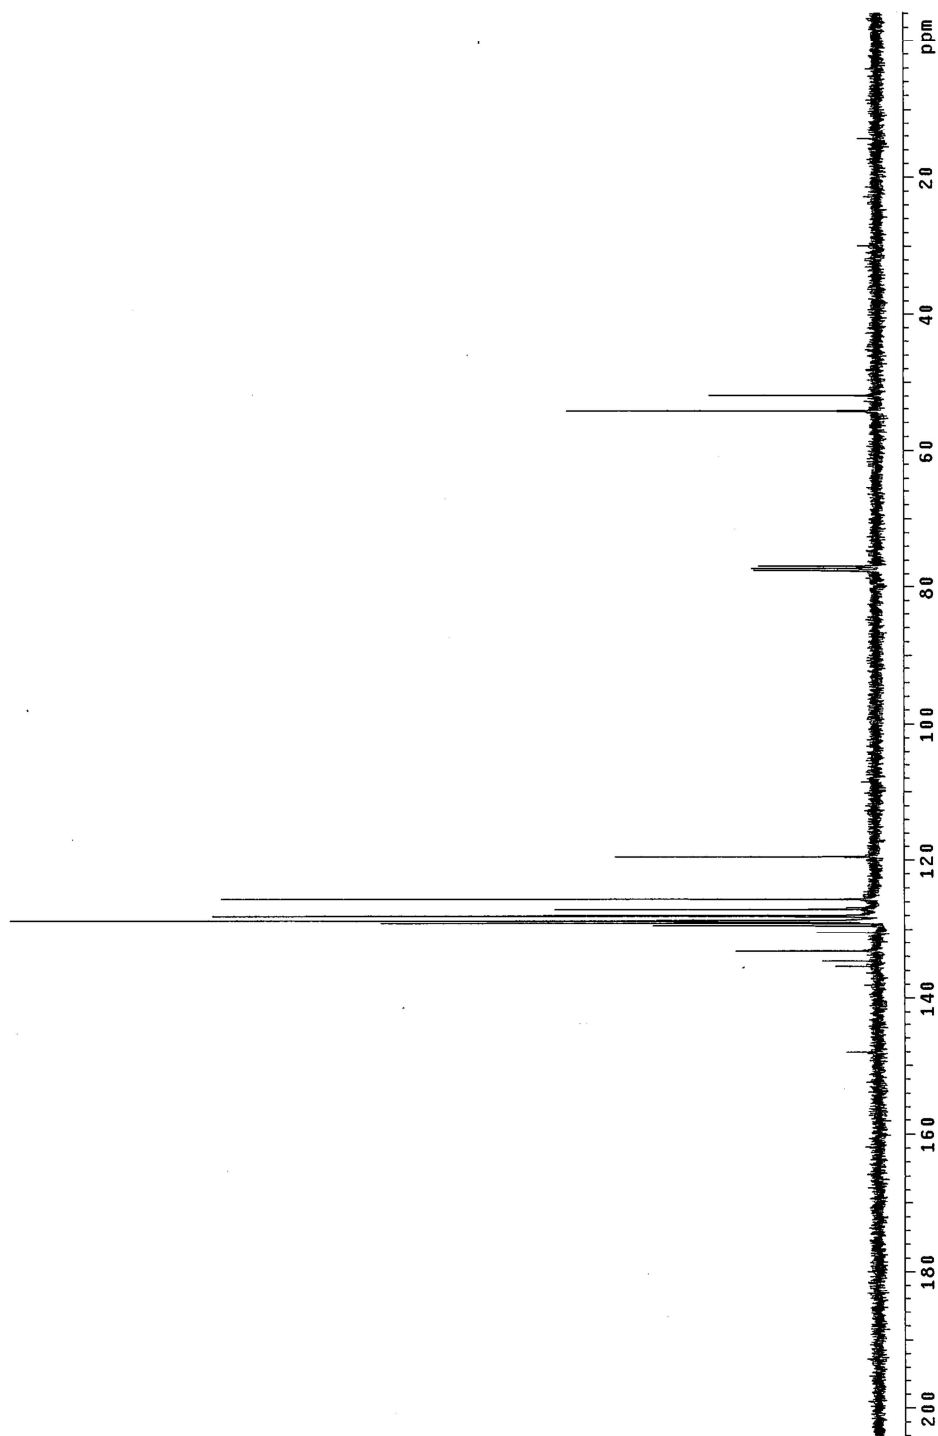

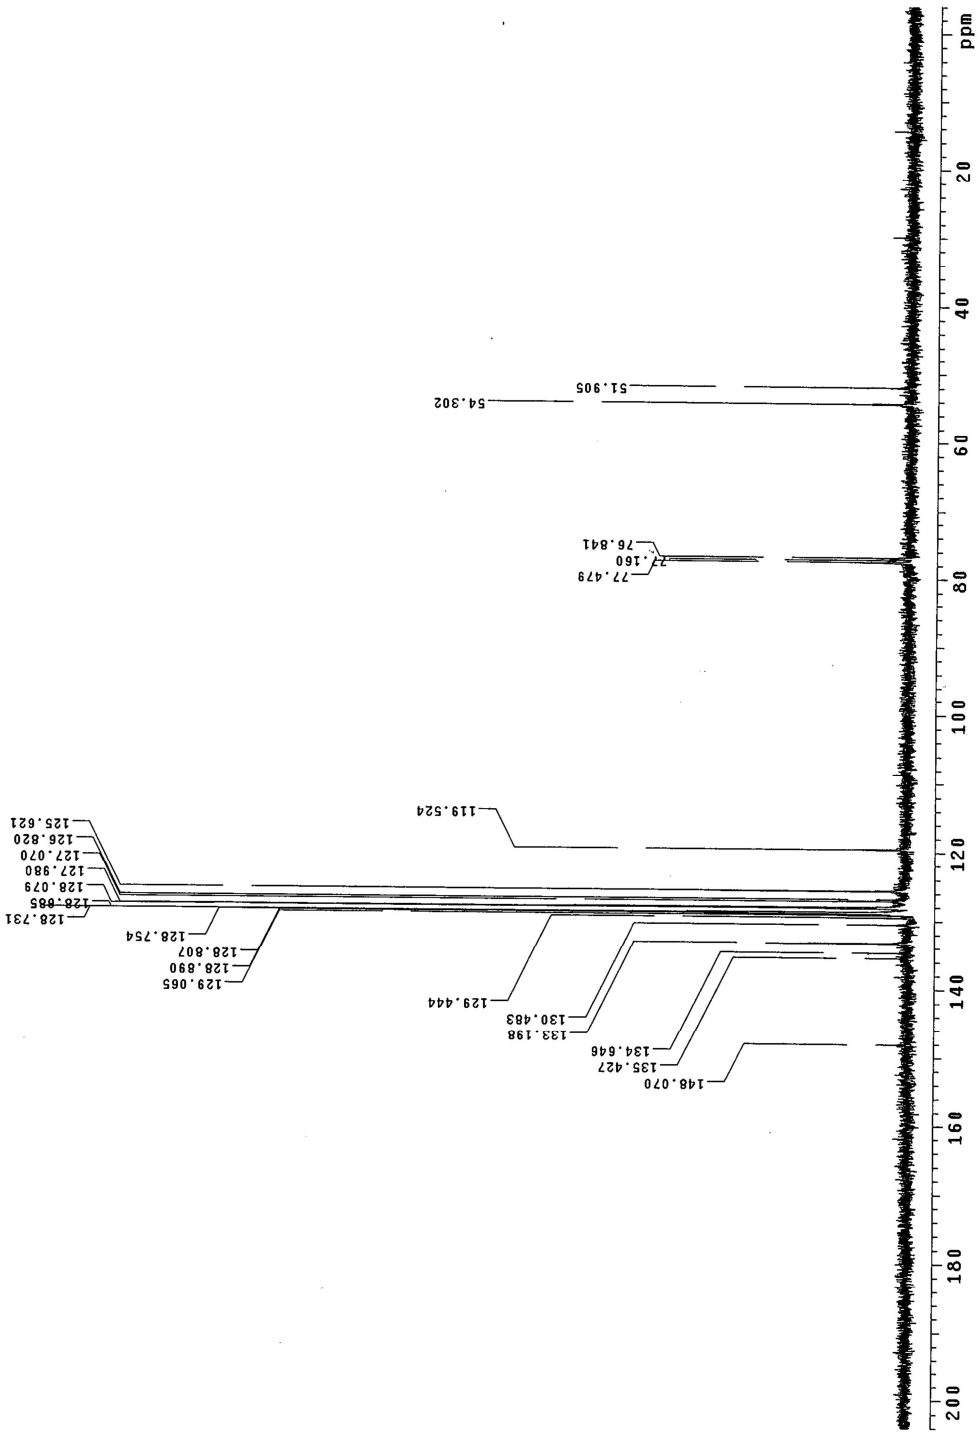

*1-benzyl-4-(4-fluorophenyl)-1H-1,2,3-triazole* (Figure 1, 2d). The representative procedure was followed to yield **2d** (97.1 mg, 77%); <sup>1</sup>H NMR (400 MHz, CDCl<sub>3</sub>) δ 7.76 (m, 2H), 7.63 (s, 1H), 7.39 (m, 2H), 7.30 (m, 2H), 7.07 (m, 2H), 5.55 (s, 2H) ppm; <sup>13</sup>C NMR (100 MHz, CDCl<sub>3</sub>) δ 162.4 (d, *J*<sub>CF</sub> = 244.9 Hz), 147.1, 134.5, 129.0, 128.7, 128.0, 127.3 (d, *J*<sub>CF</sub> = 7.6 Hz), 126.7 (d, *J*<sub>CF</sub> = 3.0 Hz), 119.3, 115.7 (d, *J*<sub>CF</sub> = 21.2 Hz), 54.3 ppm; IR (neat) 3102, 1611, 1495, 1226 cm<sup>-1</sup>; HRMS (EI+) calcd for C<sub>15</sub>H<sub>12</sub>FN<sub>3</sub> (M<sup>+</sup>) 253.1015, found 253.1014.

$^1\text{H}$  NMR (400 MHz) at 25 °C

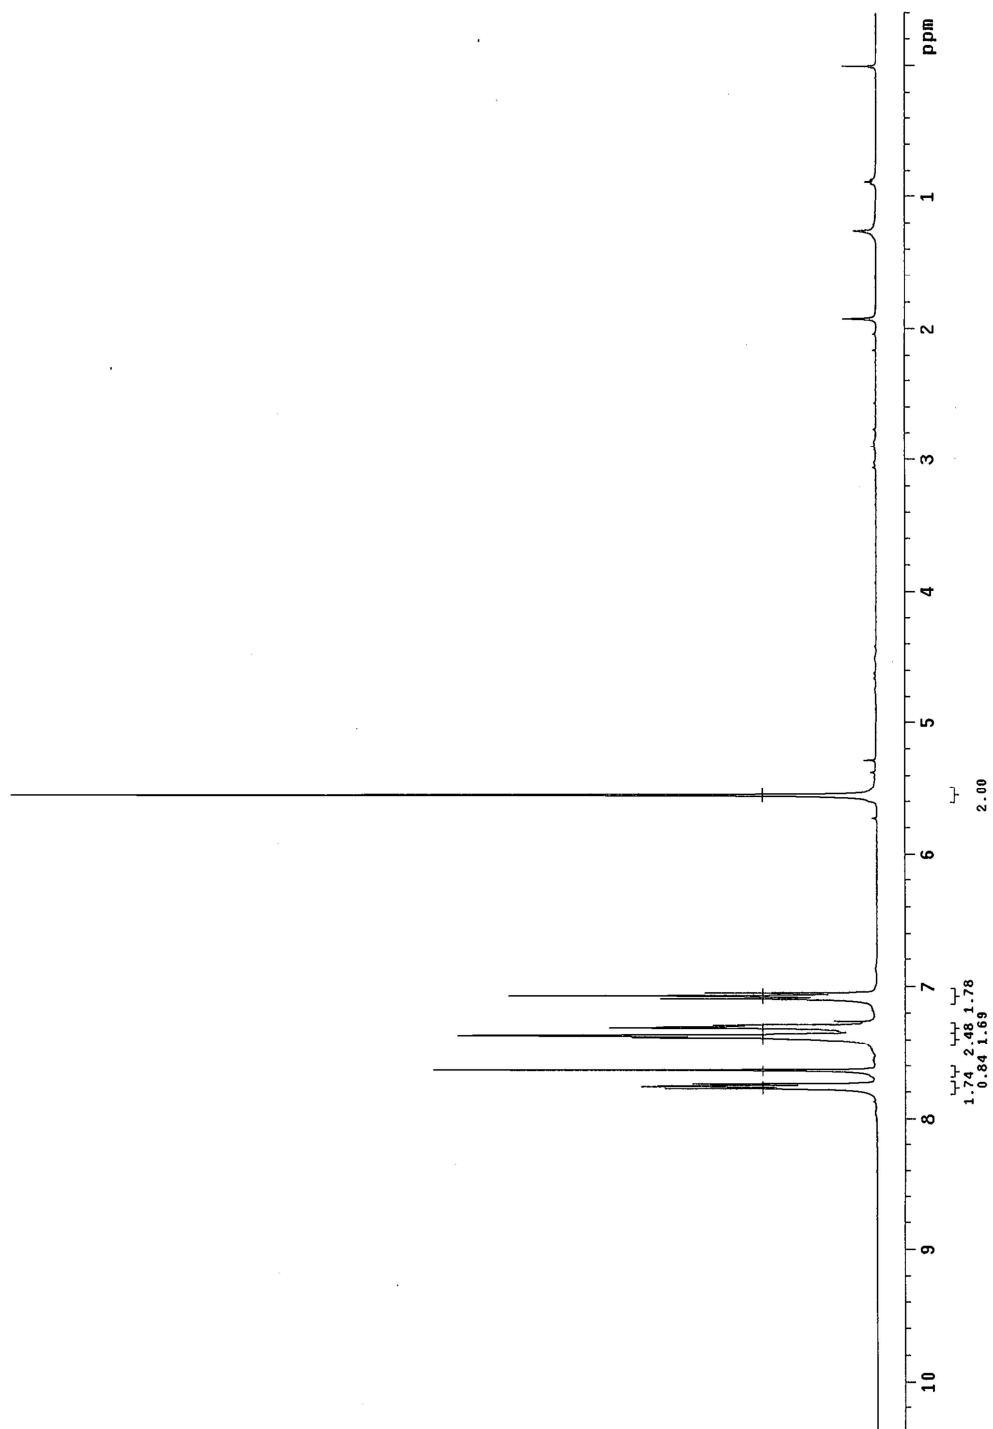

$^{13}\text{C}$  NMR (100 MHz) at 25 °C

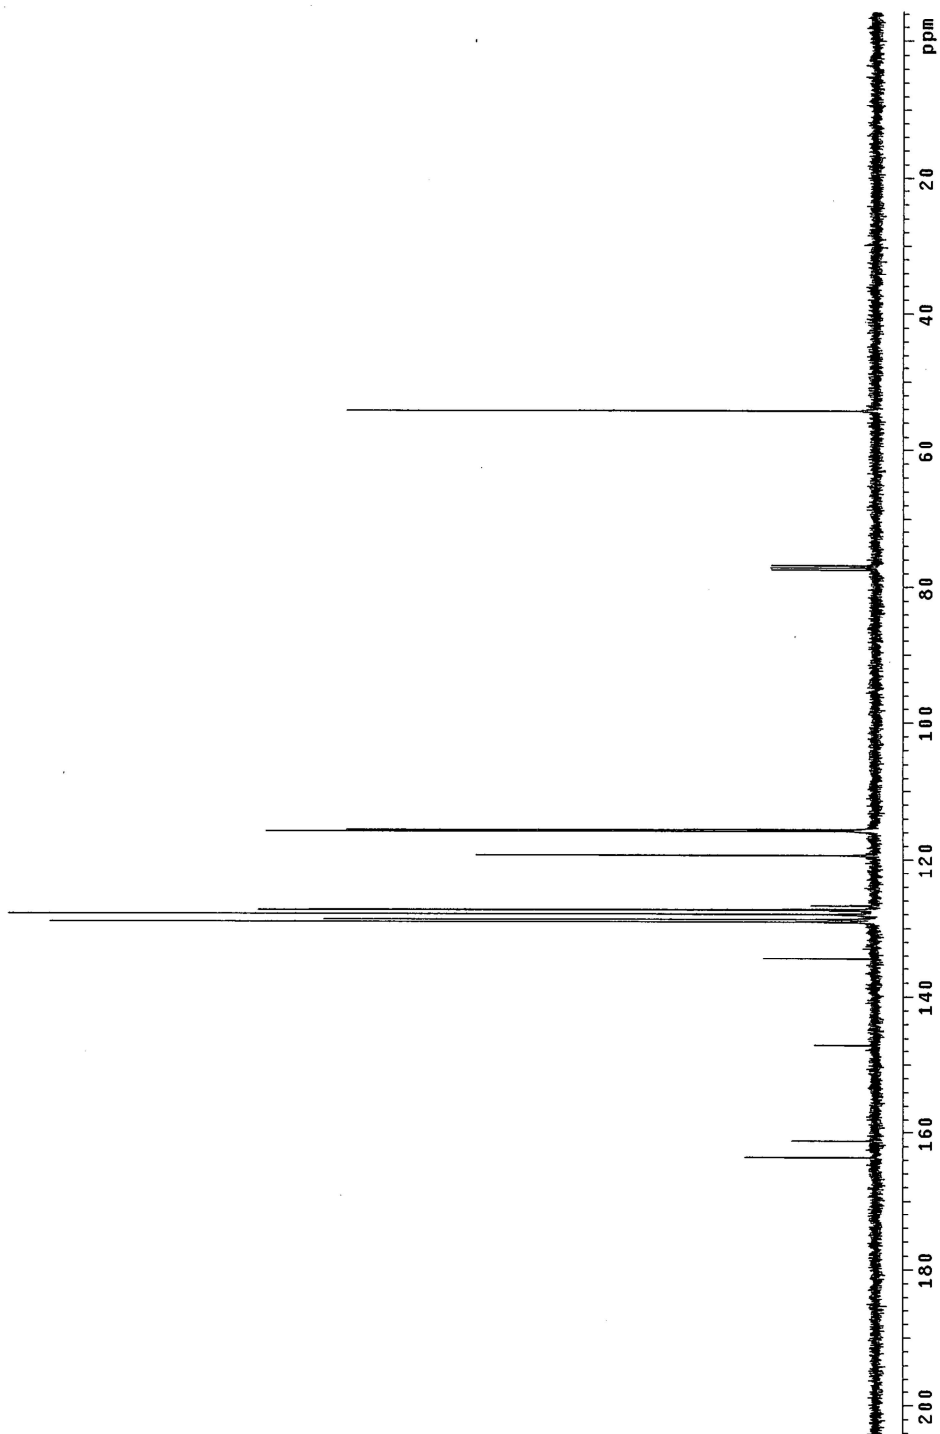

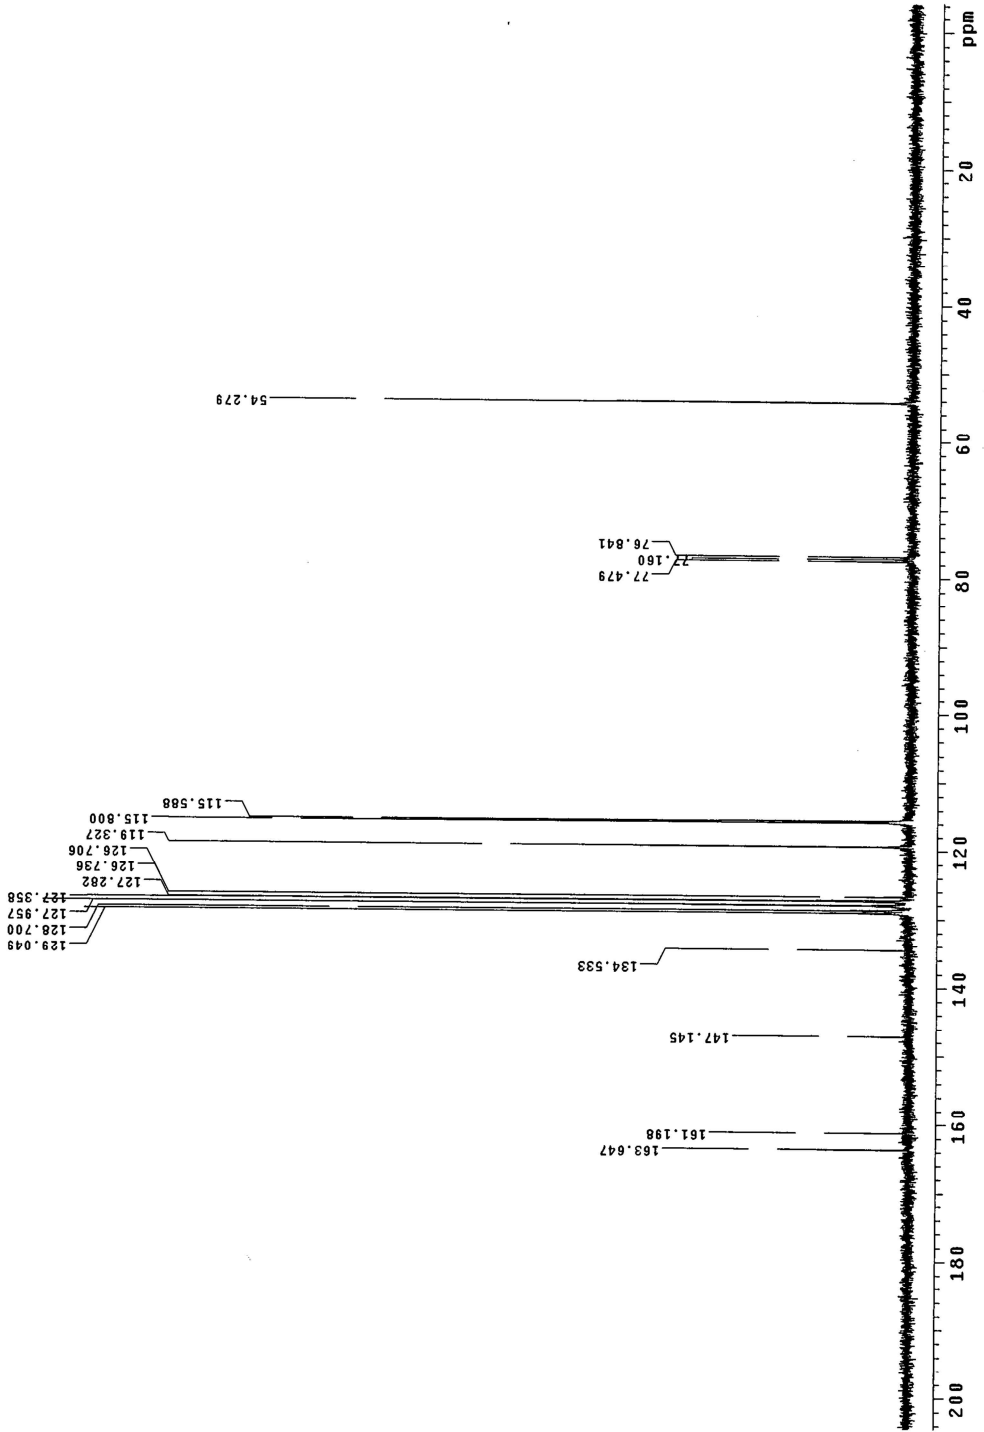



*1-benzyl-4-(4-chlorophenyl)-1H-1,2,3-triazole* (Figure 1, 3d). The representative procedure was followed to yield **3d** (115.3 mg, 85%); <sup>1</sup>H NMR (400 MHz, CDCl<sub>3</sub>) δ 7.72 (m, 2H), 7.66 (s, 1H), 7.37 (m, 5H), 7.30 (m, 2H), 5.56 (s, 2H) ppm; <sup>13</sup>C NMR (100 MHz, CDCl<sub>3</sub>) δ 146.9, 134.4, 133.7, 129.1, 129.0, 128.9, 128.7, 128.0, 126.8, 119.6, 54.3 ppm; IR (neat) 3117, 1631, 1480, 1225 cm<sup>-1</sup>; HRMS (EI+) caclcd for C<sub>15</sub>H<sub>12</sub>ClN<sub>3</sub> (M<sup>+</sup>) 269.0720, found 269.0717.

$^1\text{H}$  NMR (400 MHz) at 25 °C

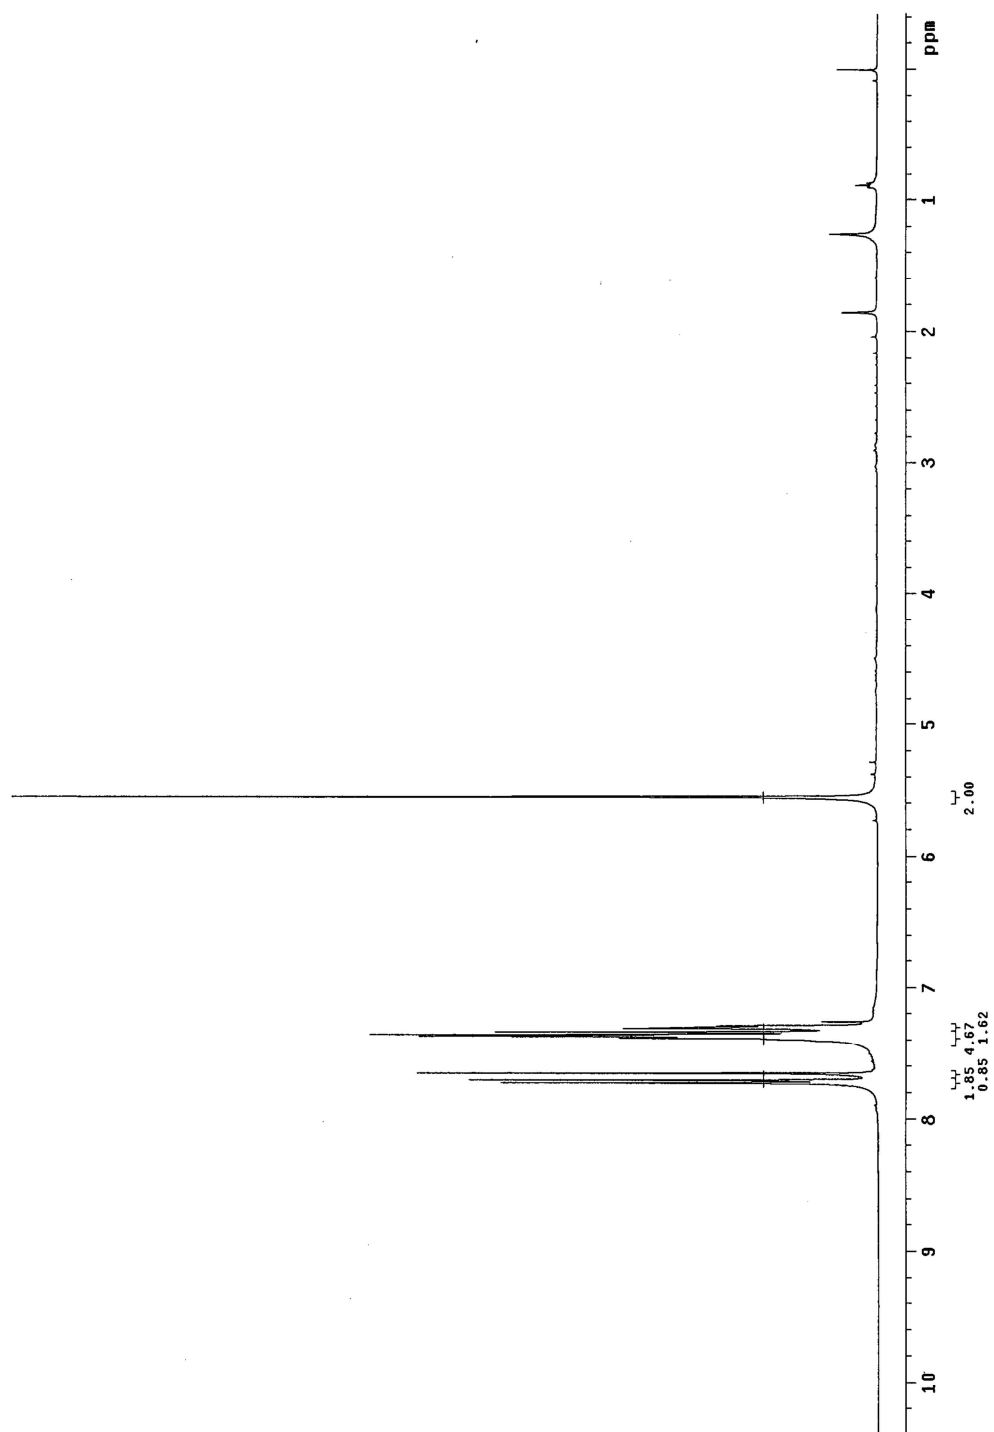

$^{13}\text{C}$  NMR (100 MHz) at 25 °C

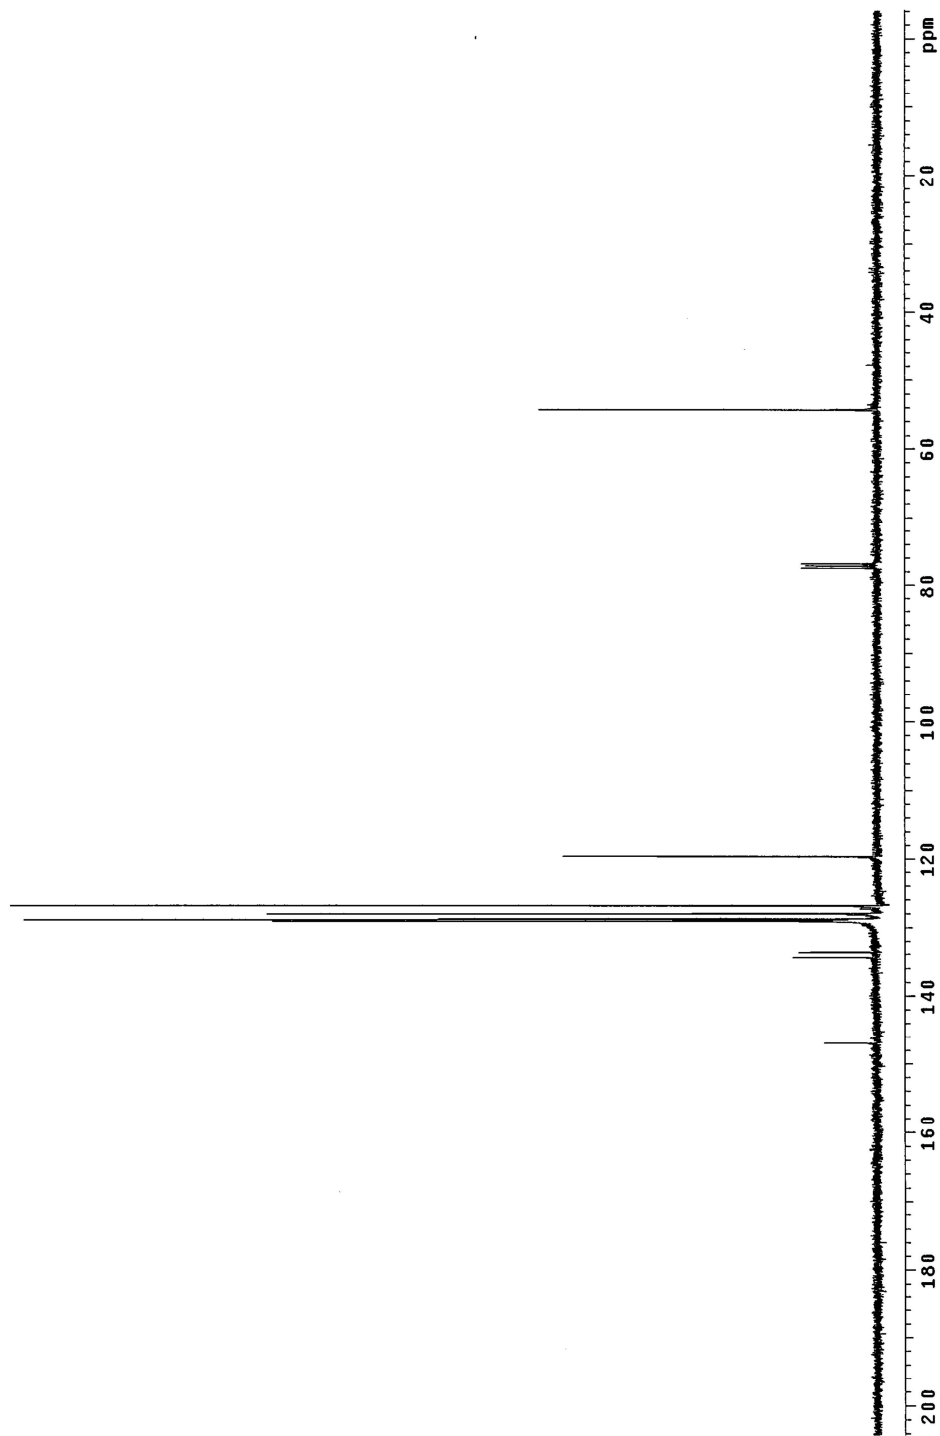

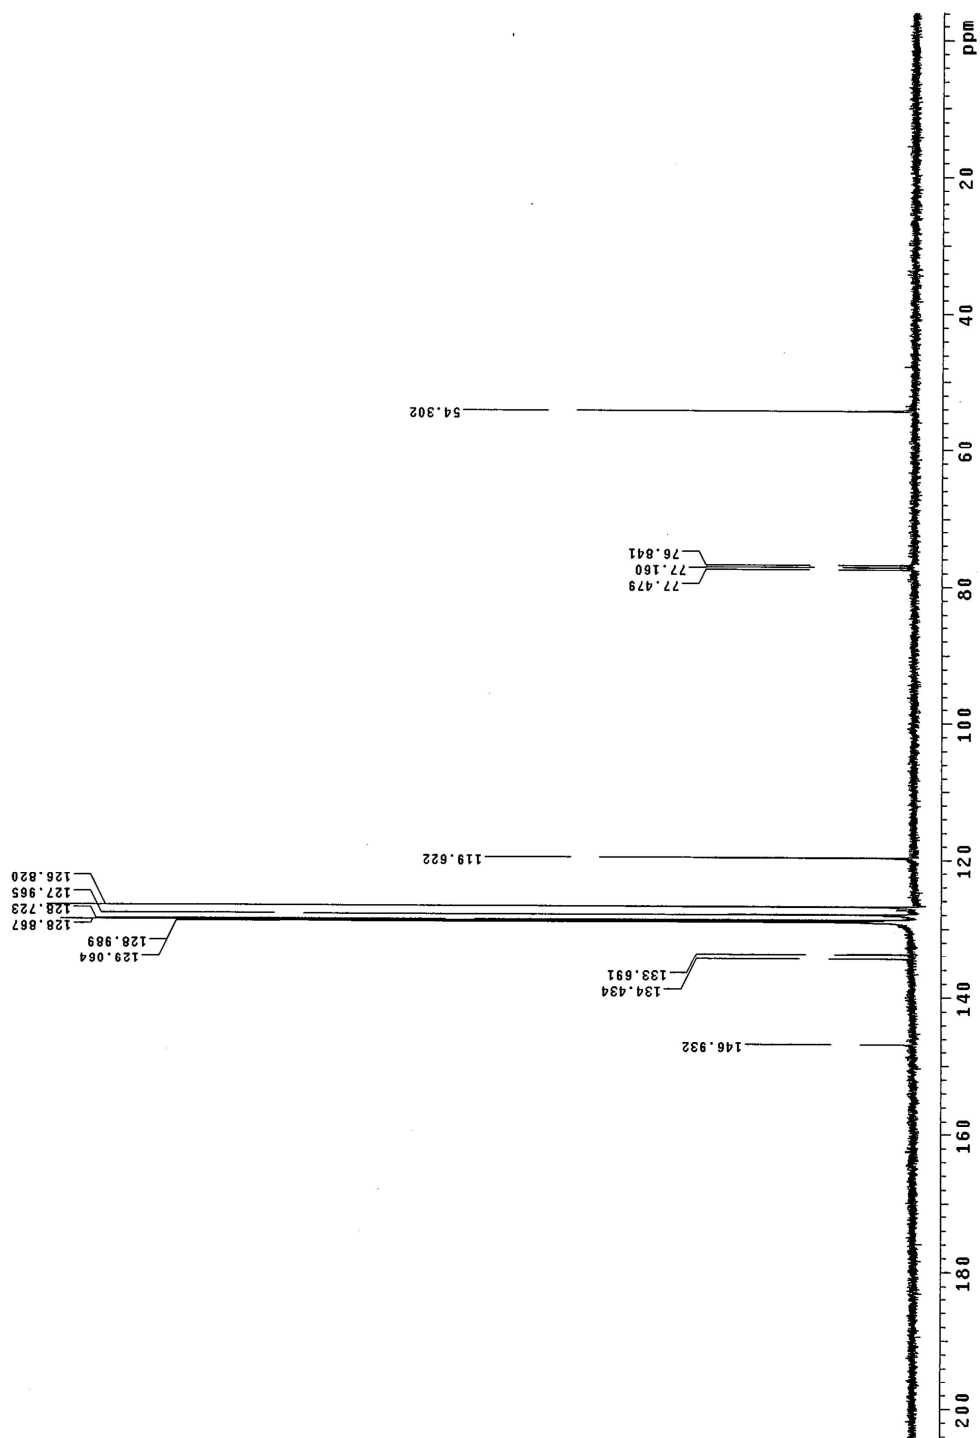

*1-benzyl-4-p-tolyl-1H-1,2,3-triazole* (Figure 1, 4d). The representative procedure was followed to yield **4d** (97.3 mg, 78%);  $^1\text{H}$  NMR (400 MHz,  $\text{CDCl}_3$ )  $\delta$  7.69 (d,  $J = 8.0\text{Hz}$ , 2H), 7.63 (s, 1H), 7.38 (m, 3H), 7.32 (m, 2H), 7.21 (d,  $J = 7.6\text{Hz}$ , 2H), 5.56 (s, 2H), 2.36 (s, 3H) ppm;  $^{13}\text{C}$  NMR (100 MHz,  $\text{CDCl}_3$ )  $\delta$  148.2, 137.9, 134.7, 129.4, 129.1, 128.9, 128.7, 128.0, 127.7, 127.4, 125.6, 119.2, 54.3, 21.5 ppm; IR (neat) 3145, 2360, 1553, 1222  $\text{cm}^{-1}$ ; HRMS (EI+) calcd for  $\text{C}_{16}\text{H}_{15}\text{N}_3$  ( $\text{M}^+$ ) 249.1266, found 249.1264.

$^1\text{H}$  NMR (400 MHz) at 25 °C

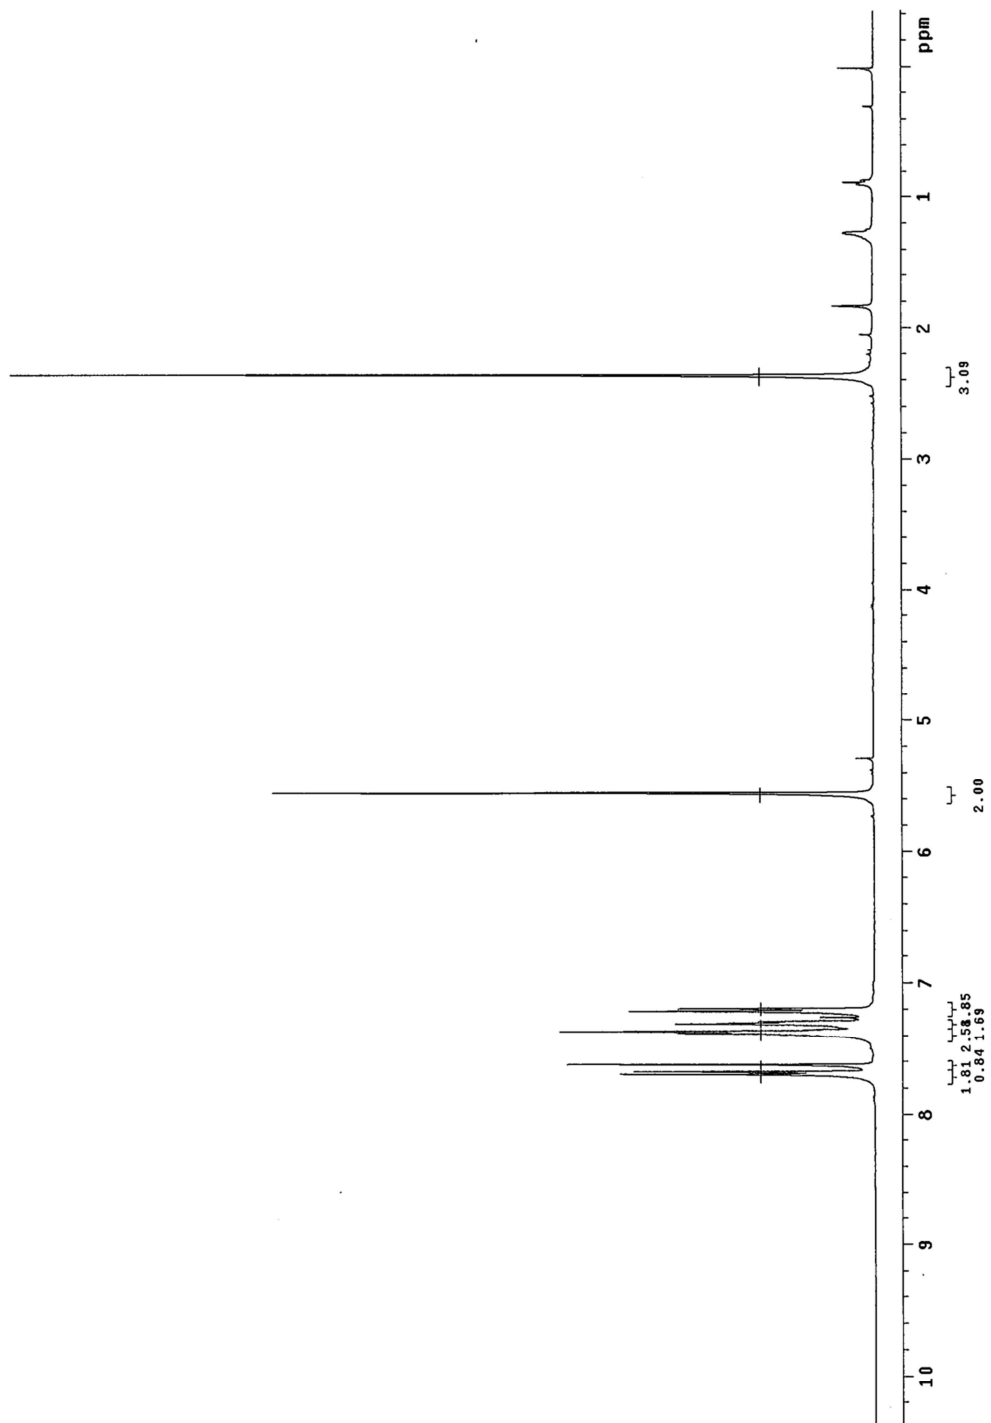

$^{13}\text{C}$  NMR (100 MHz) at 25 °C

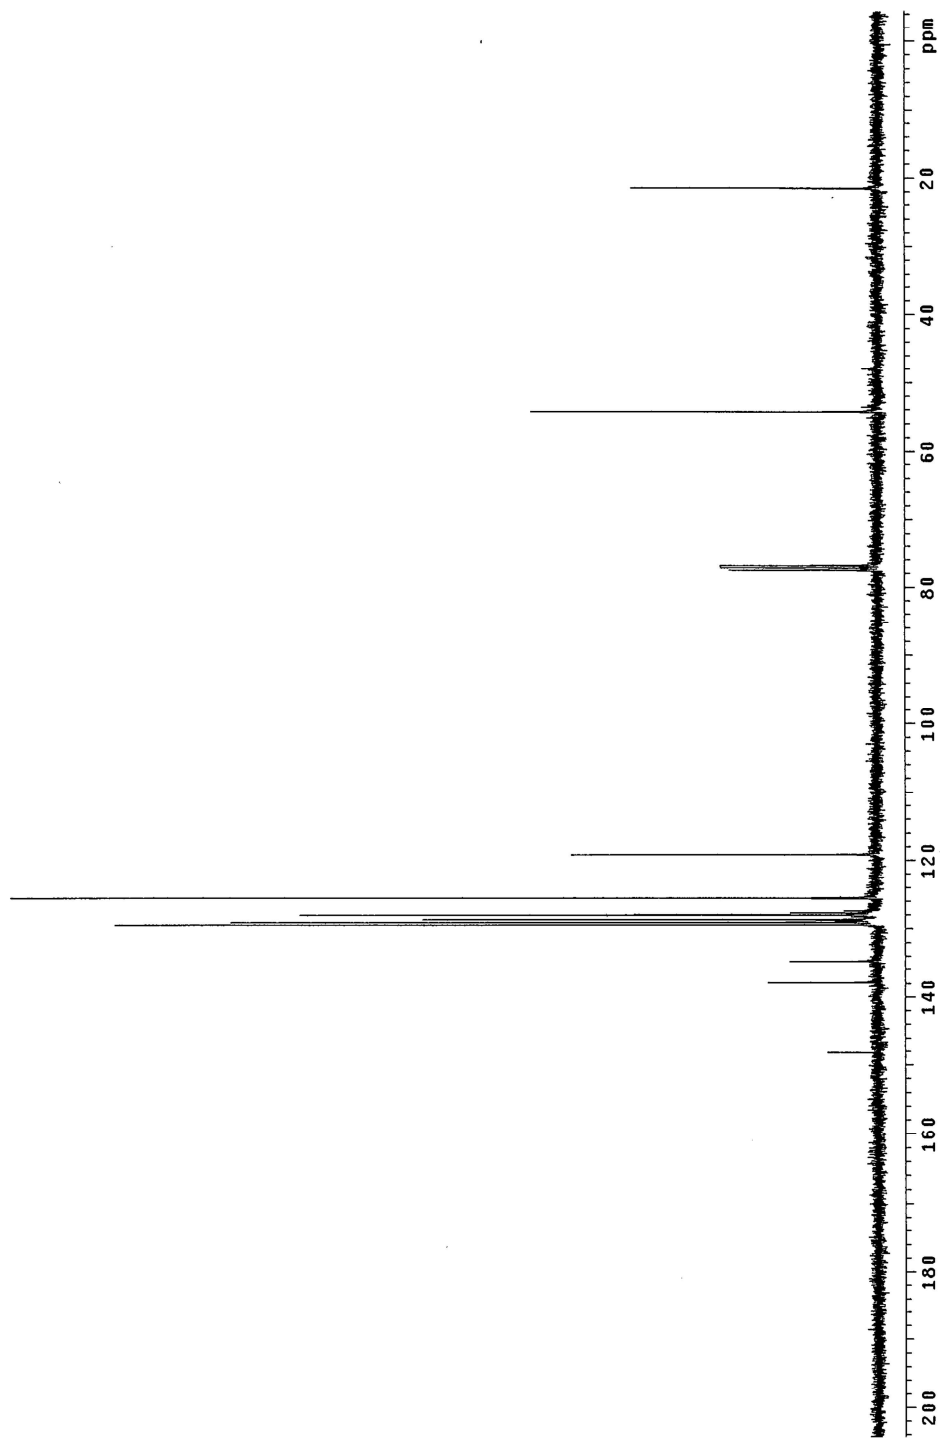

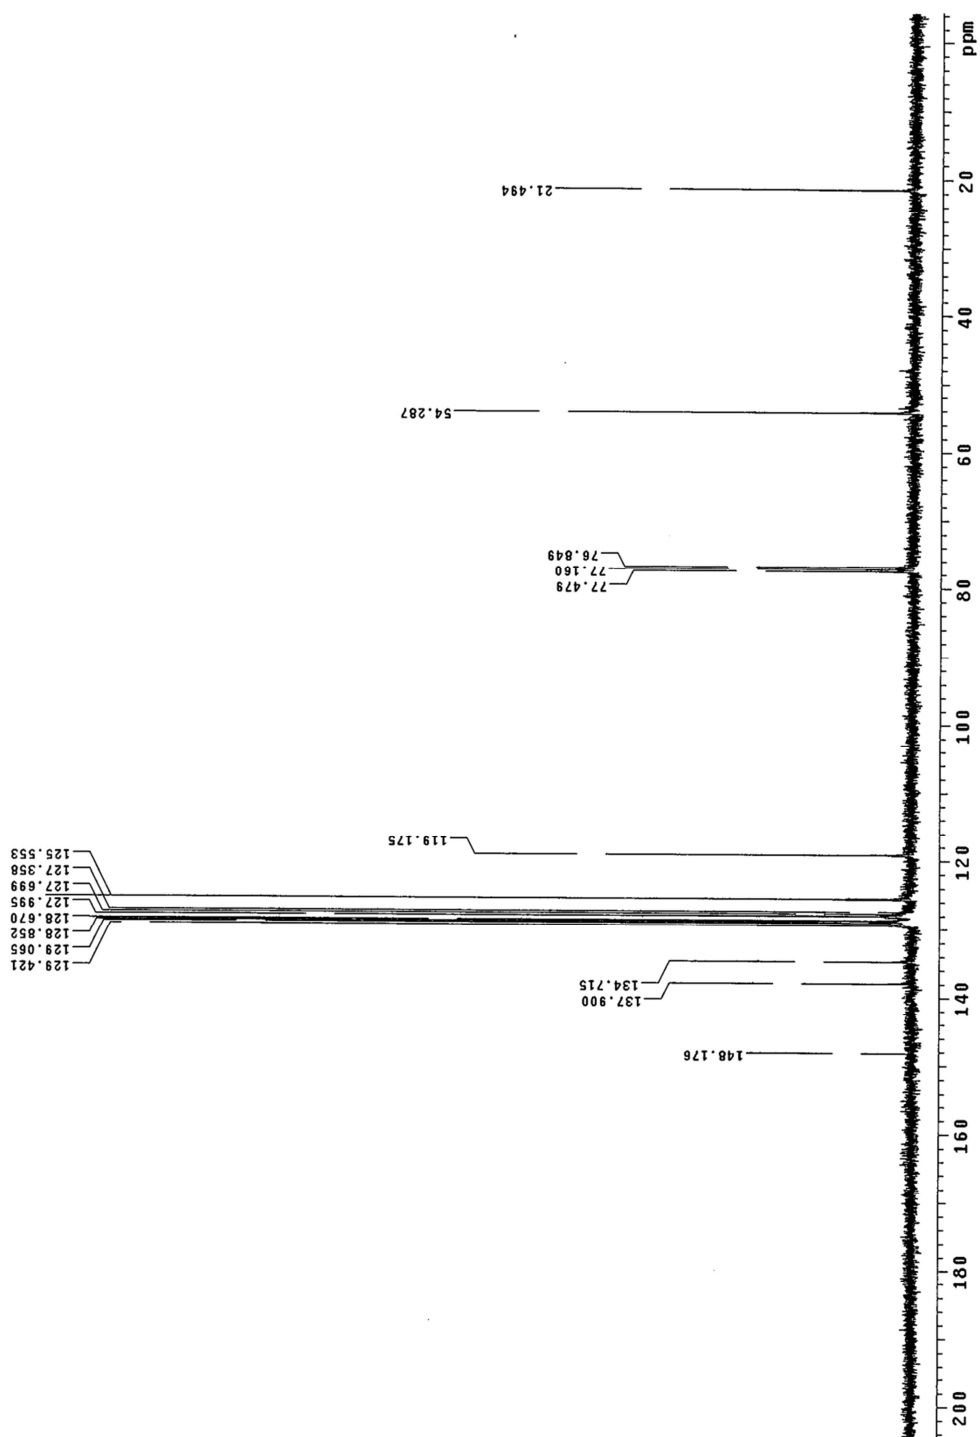



*1-benzyl-4-m-tolyl-1H-1,2,3-triazole* (Figure 1, 5d). The representative procedure was followed to yield **5d** (105.7 mg, 85%);  $^1\text{H}$  NMR (400 MHz,  $\text{CDCl}_3$ )  $\delta$  7.66 (s, 1H), 7.65 (s, 1H), 7.57 (d,  $J = 8.0\text{Hz}$ , 1H), 7.41 - 7.28 (m, 6H), 7.13 (d,  $J = 3.6\text{Hz}$ , 1H), 5.56 (s, 2H), 2.38 (s, 3H) ppm;  $^{13}\text{C}$  NMR (100 MHz,  $\text{CDCl}_3$ )  $\delta$  148.2, 138.4, 134.7, 130.3, 129.1, 128.9, 128.7 (2C), 128.0, 126.3, 122.7, 119.5, 54.3, 21.6 ppm; IR (neat) 3137, 2354, 1644, 1591, 1219  $\text{cm}^{-1}$ ; HRMS (EI+) caclcd for  $\text{C}_{16}\text{H}_{15}\text{N}_3$  ( $\text{M}^+$ ) 249.1266, found 249.1267.

$^1\text{H}$  NMR (400 MHz) at 25 °C

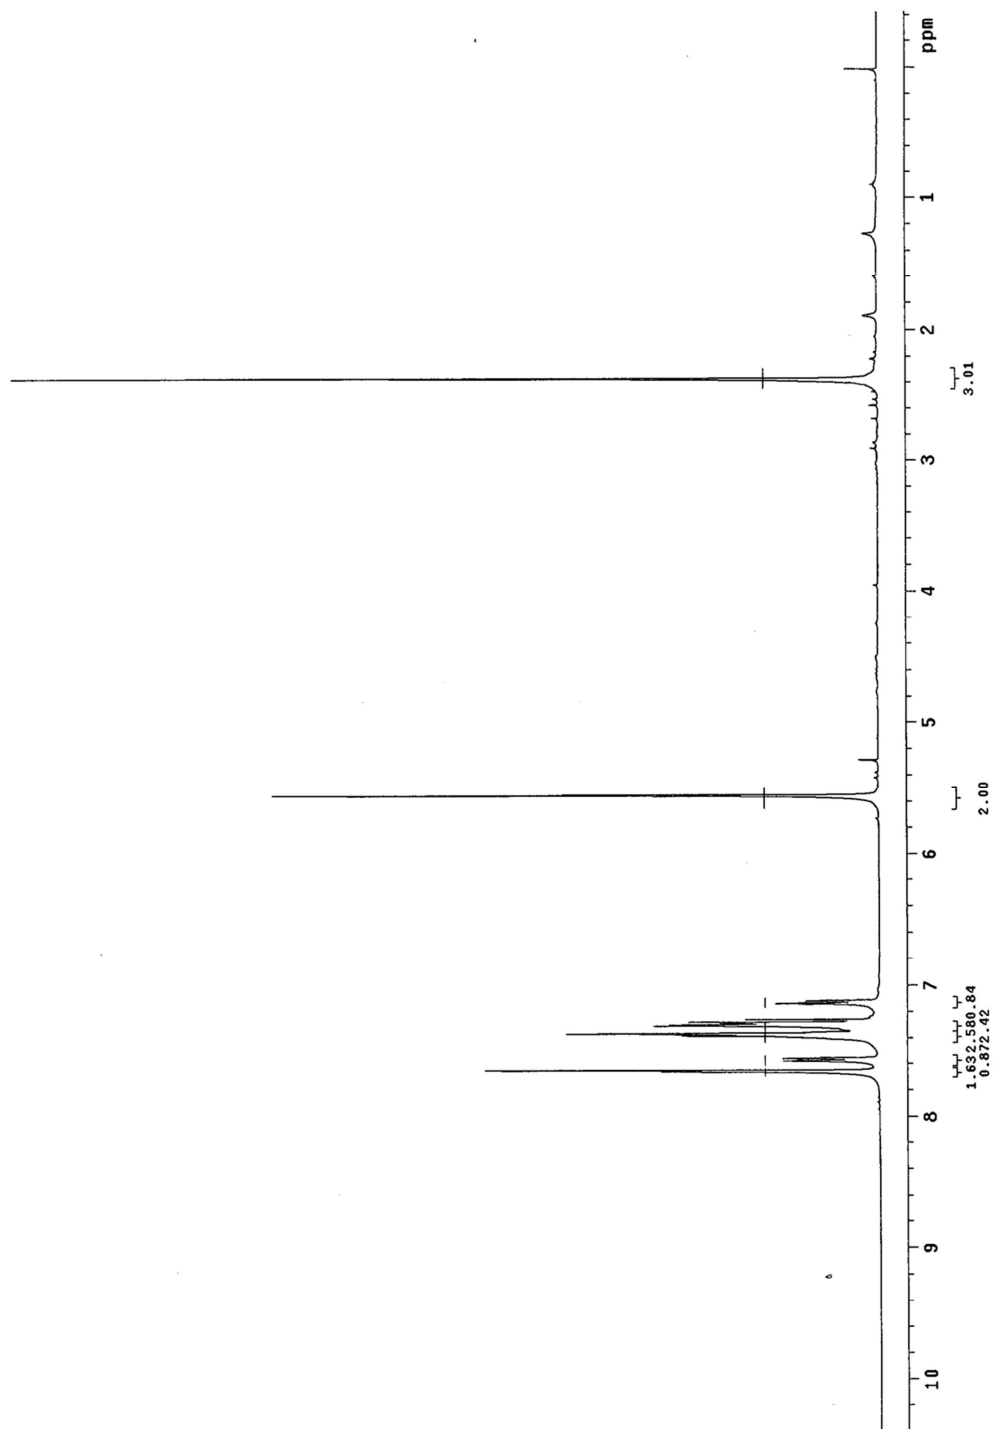

$^{13}\text{C}$  NMR (100 MHz) at 25 °C

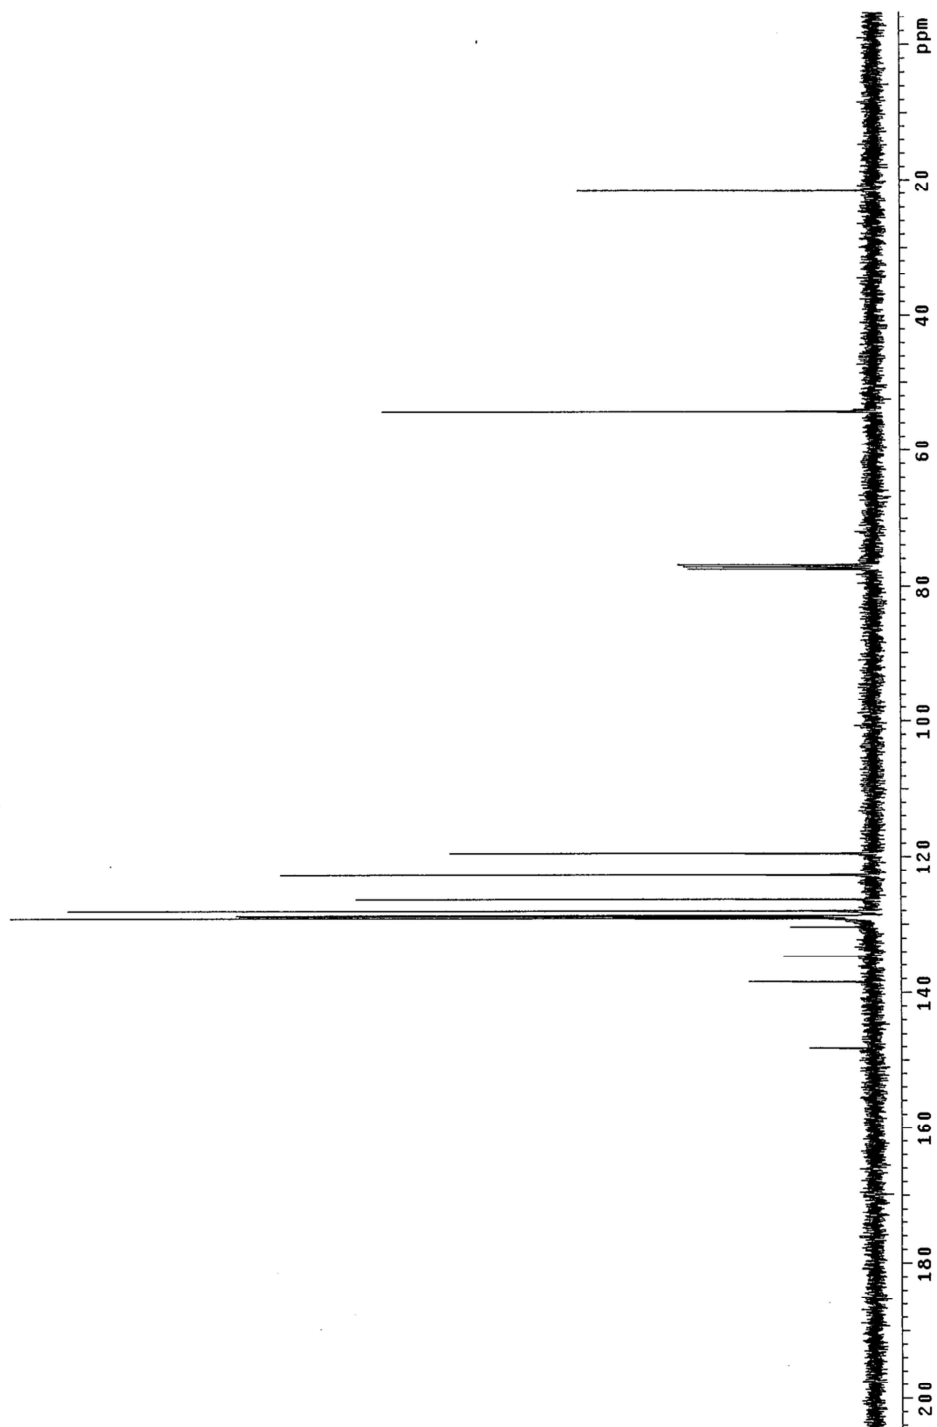

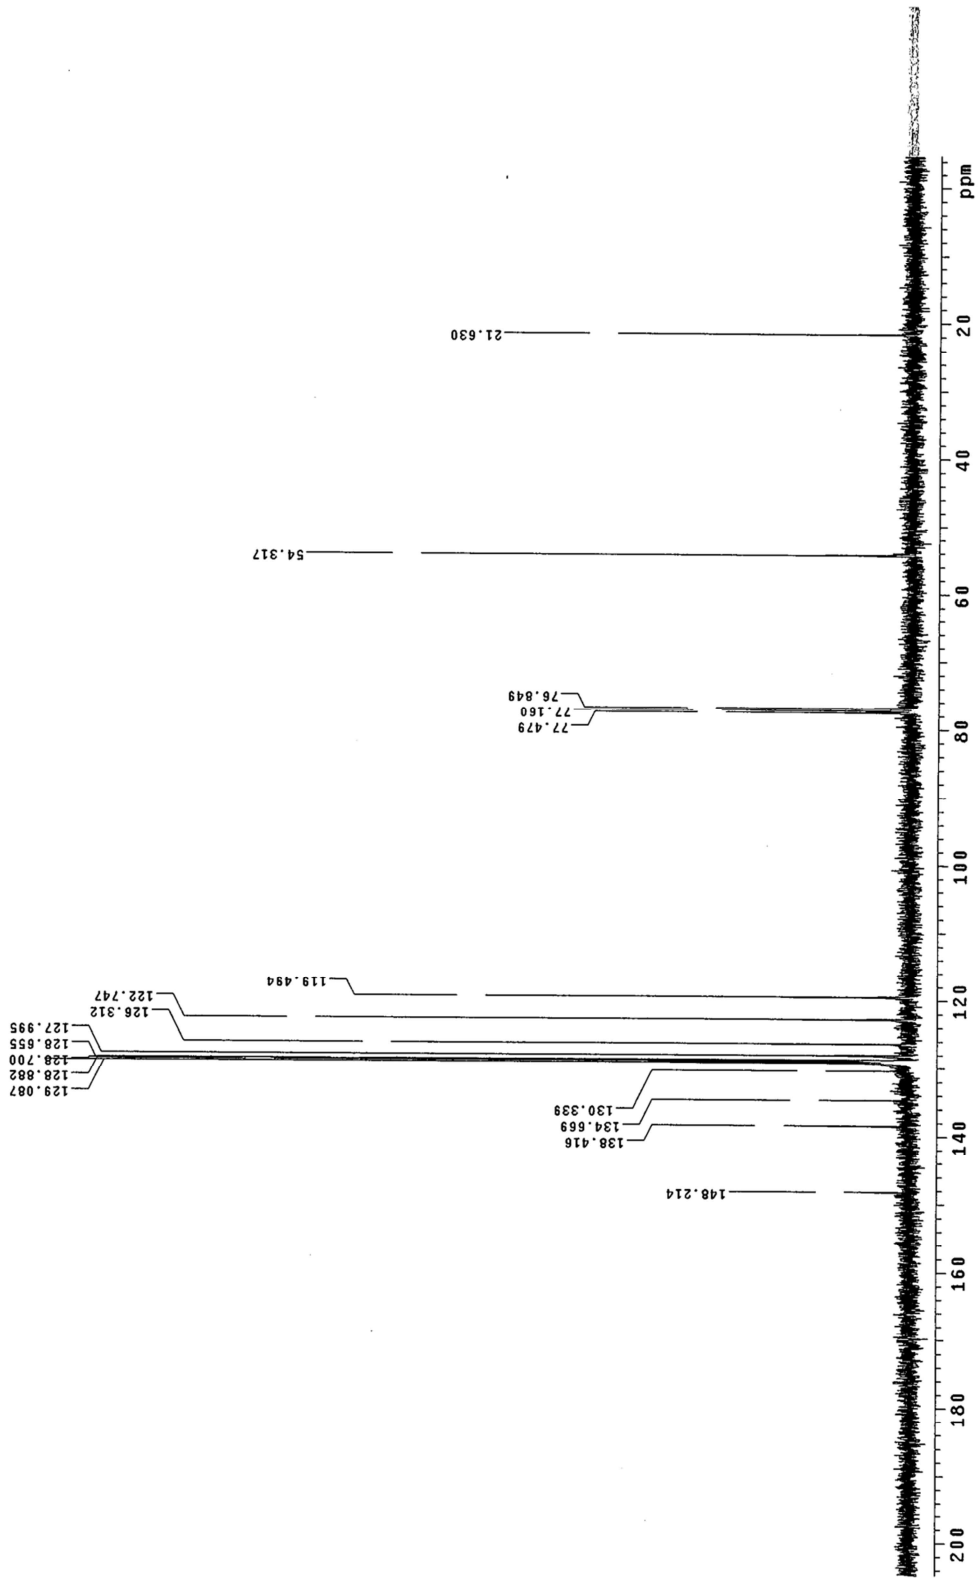

*1-benzyl-4-o-tolyl-1H-1,2,3-triazole* (Figure 1, 6d). The representative procedure was followed to yield **6d** (97.6mg, 78%); <sup>1</sup>H NMR (400 MHz, CDCl<sub>3</sub>) δ 7.76 (m, 1H), 7.60 (s, 1H), 7.37 (m, 3H), 7.29 (m, 2H), 7.26 (m, 3H), 5.57 (s, 2H), 2.43 (s, 3H) ppm; <sup>13</sup>C NMR (100 MHz, CDCl<sub>3</sub>) δ 147.3, 135.3, 134.7, 130.7, 129.8, 129.0, 128.7, 128.6, 128.0, 127.8, 125.9, 121.7, 54.1, 21.5 ppm; IR (neat) 3154, 2360, 1606, 1487, 1229 cm<sup>-1</sup>; HRMS (EI+) caclcd for C<sub>16</sub>H<sub>15</sub>N<sub>3</sub> (M<sup>+</sup>) 249.1266, found 249.1268.

$^1\text{H}$  NMR (400 MHz) at 25 °C

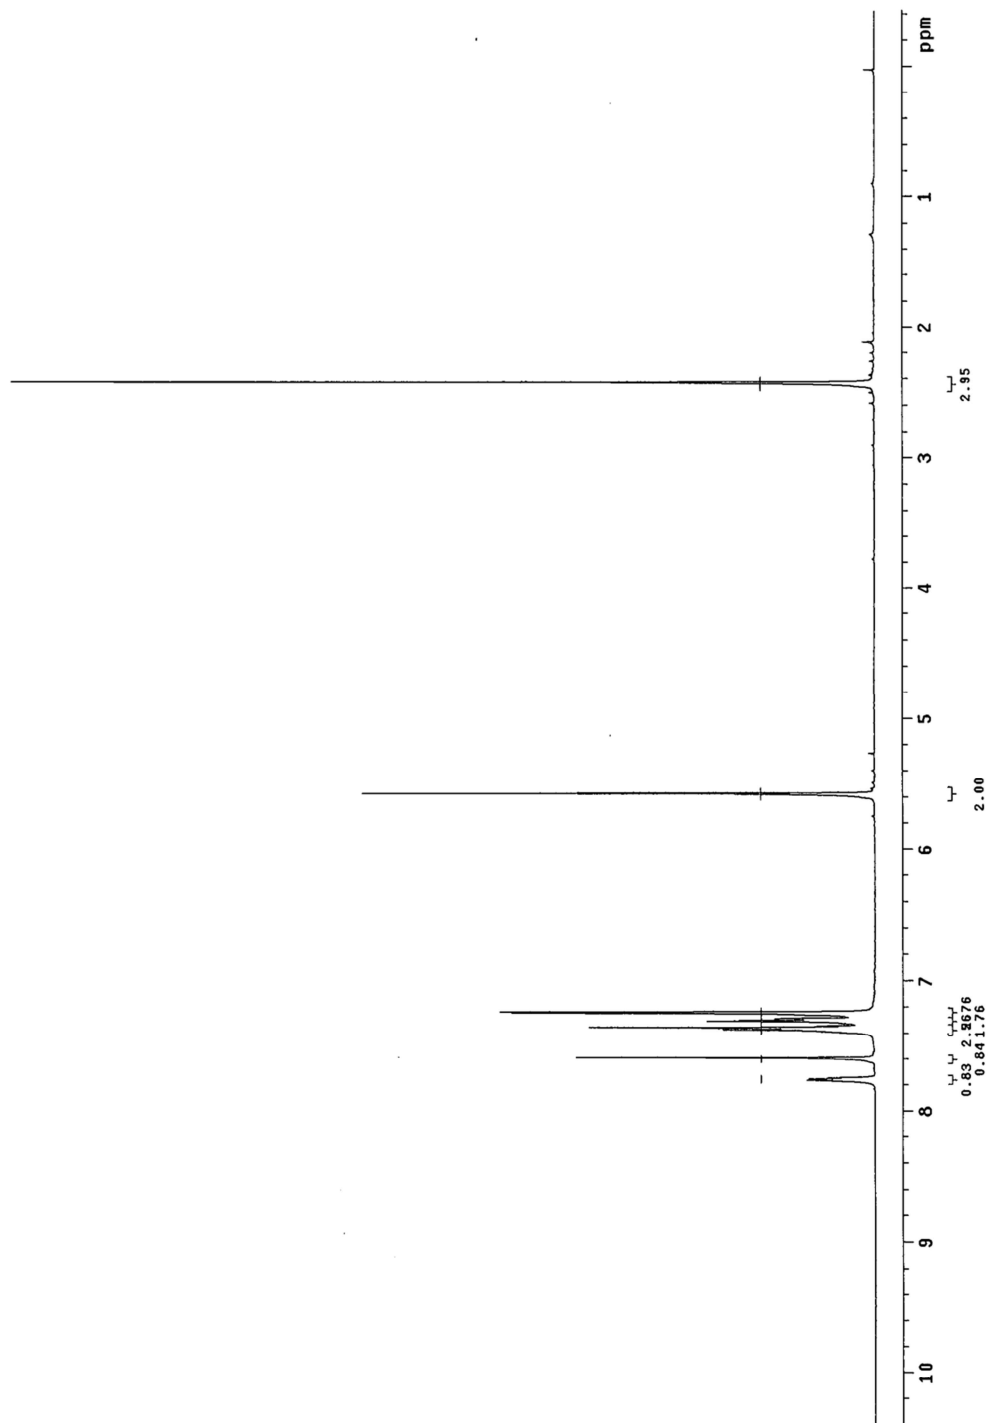

$^{13}\text{C}$  NMR (100 MHz) at 25 °C

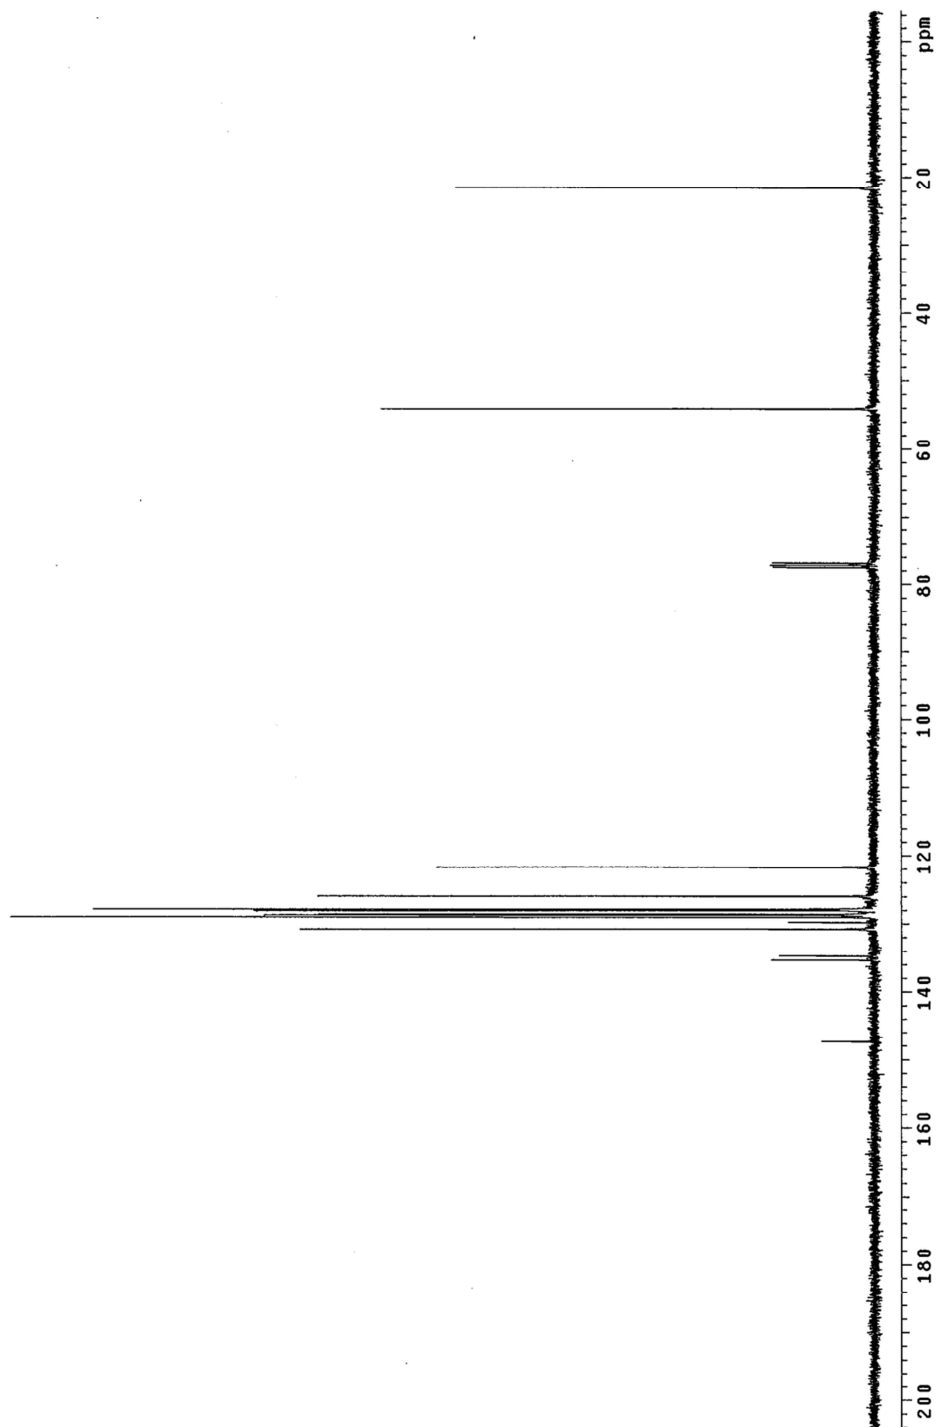

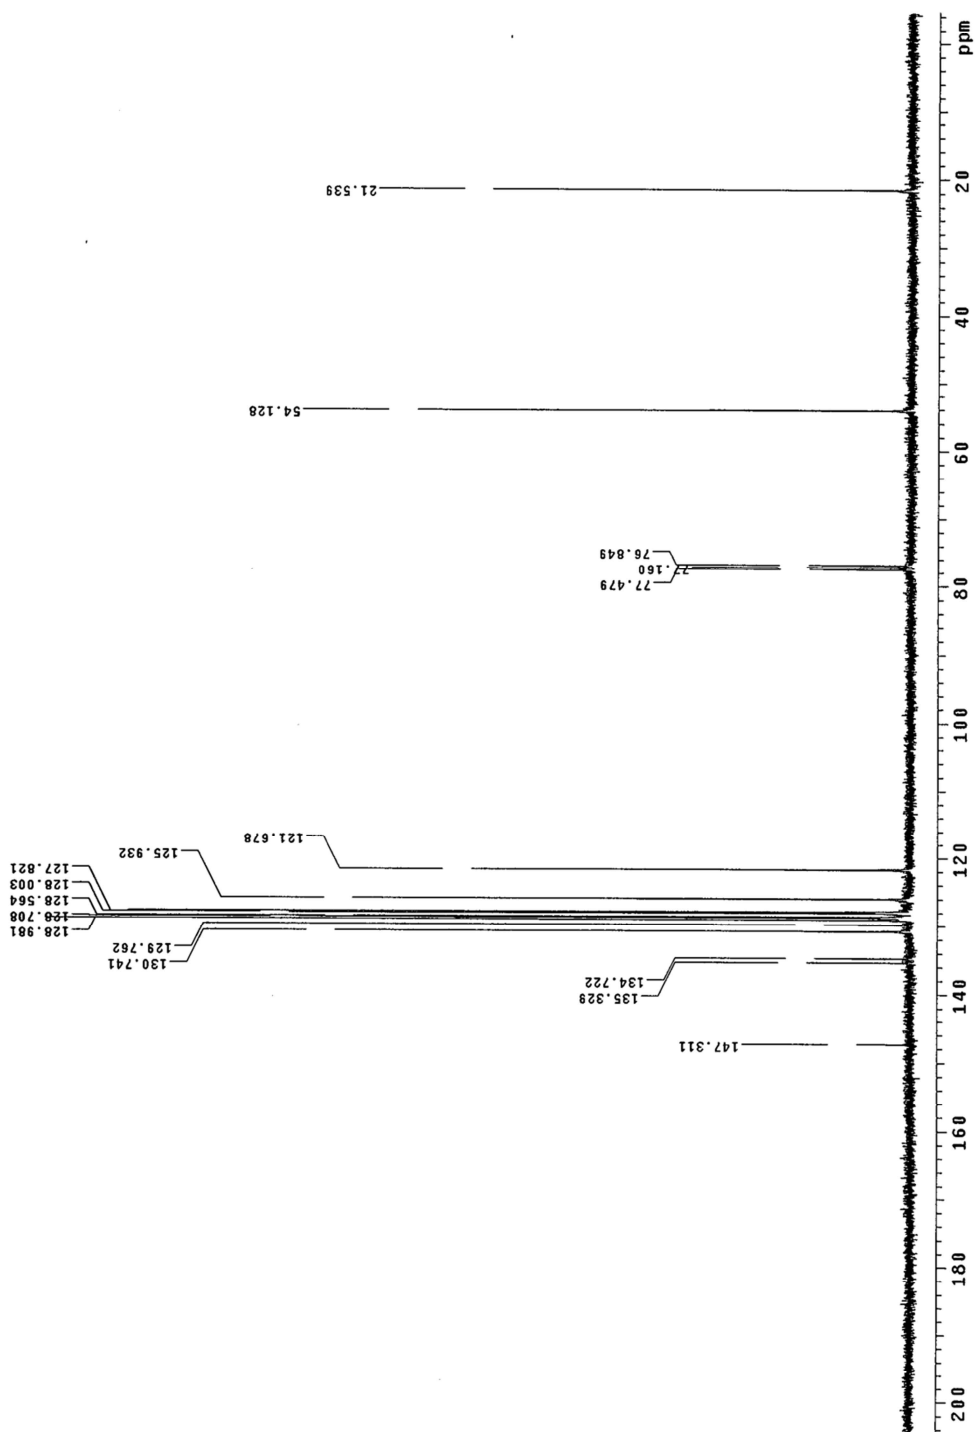



*1-benzyl-4-cyclohexenyl-1H-1,2,3-triazole* (Figure 1, 7d). The representative procedure was followed to yield **7d** (68.1 mg, 57%); <sup>1</sup>H NMR (400 MHz, CDCl<sub>3</sub>) δ 7.34 (m, 3H), 7.30 (s, 1H), 7.24 (m, 2H), 6.48 (m, 1H), 5.48 (s, 2H), 2.33 (m, 2H), 2.16 (m, 2H), 1.72 (m, 2H) ppm; <sup>13</sup>C NMR (100 MHz, CDCl<sub>3</sub>) δ 149.8, 134.9, 128.9, 128.5, 127.8, 127.2, 124.9, 118.2, 54.1, 26.5, 25.4, 22.6, 22.4 ppm; IR (neat) 3120, 2360, 1625, 1540, 1258 cm<sup>-1</sup>; HRMS (EI+) calcd for C<sub>15</sub>H<sub>17</sub>N<sub>3</sub> (M<sup>+</sup>) 239.1422, found 239.1423.

$^1\text{H}$  NMR (400 MHz) at 25 °C

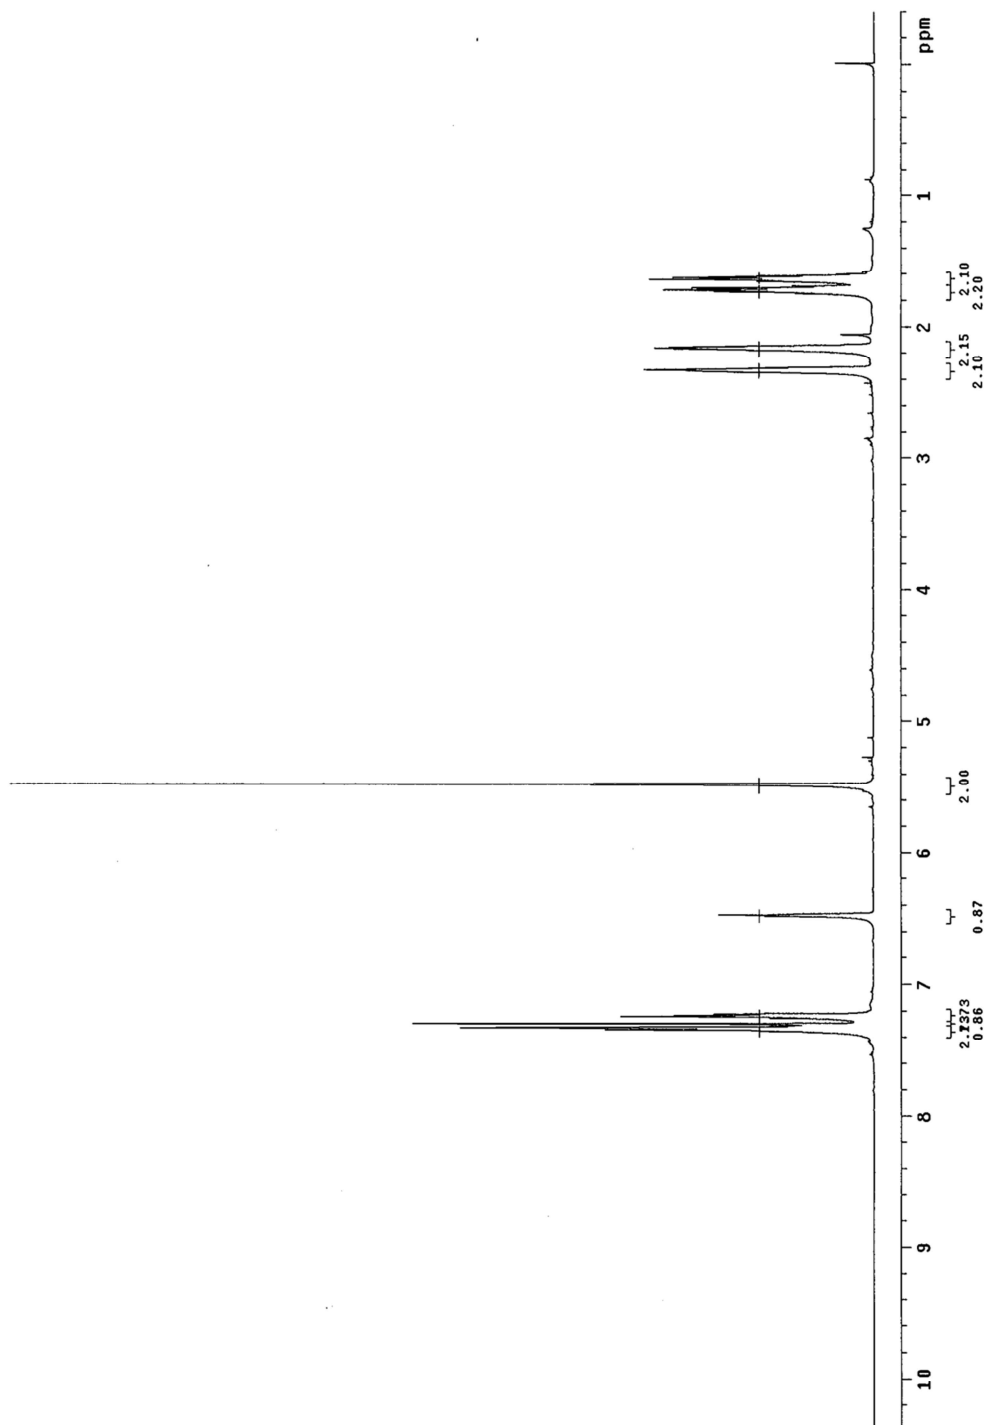

$^{13}\text{C}$  NMR (100 MHz) at 25 °C

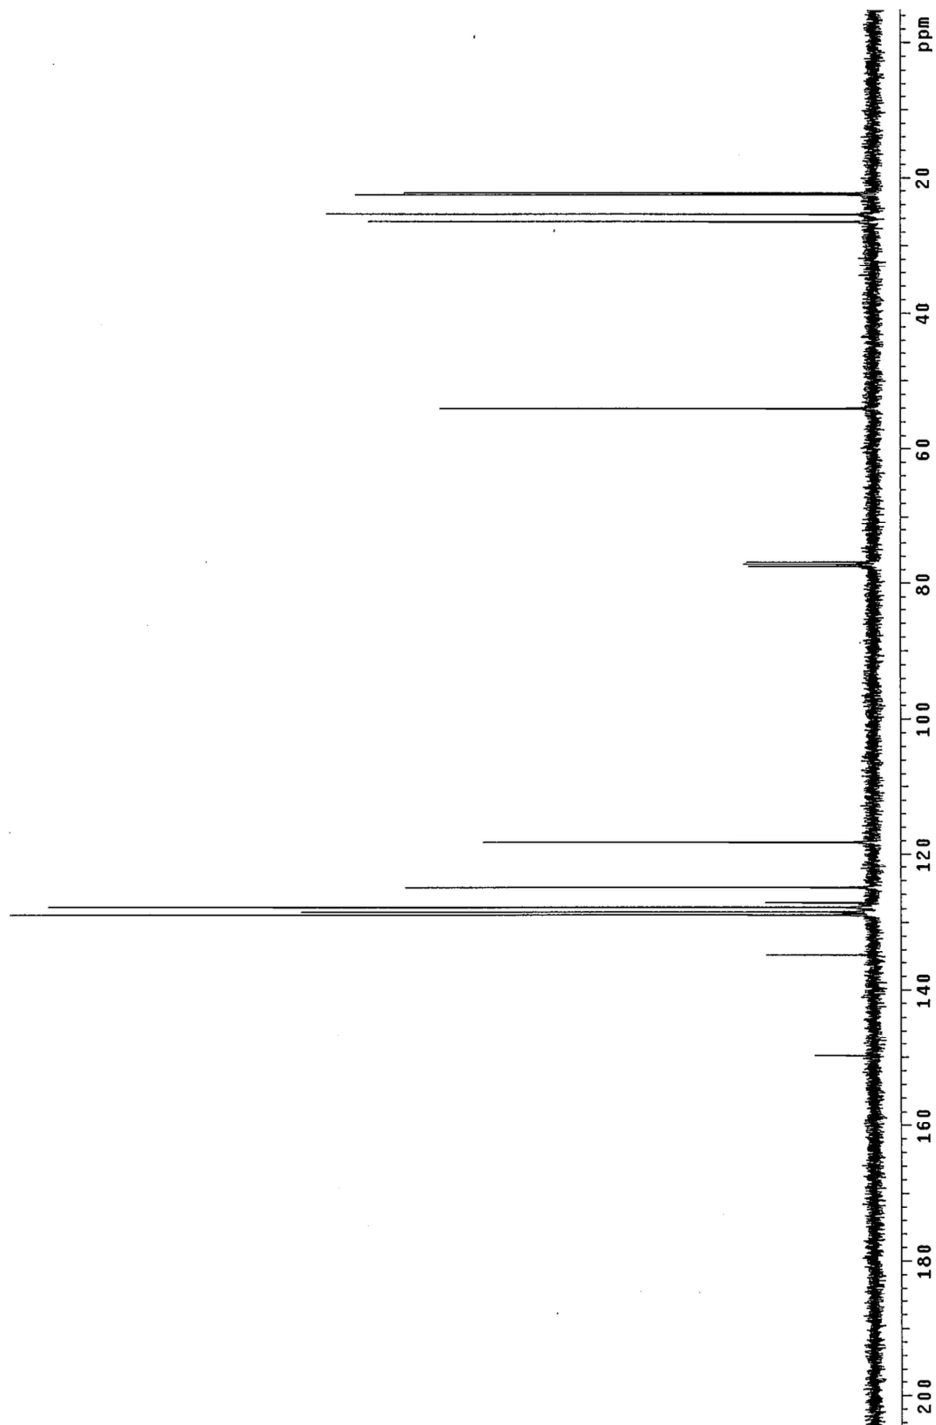

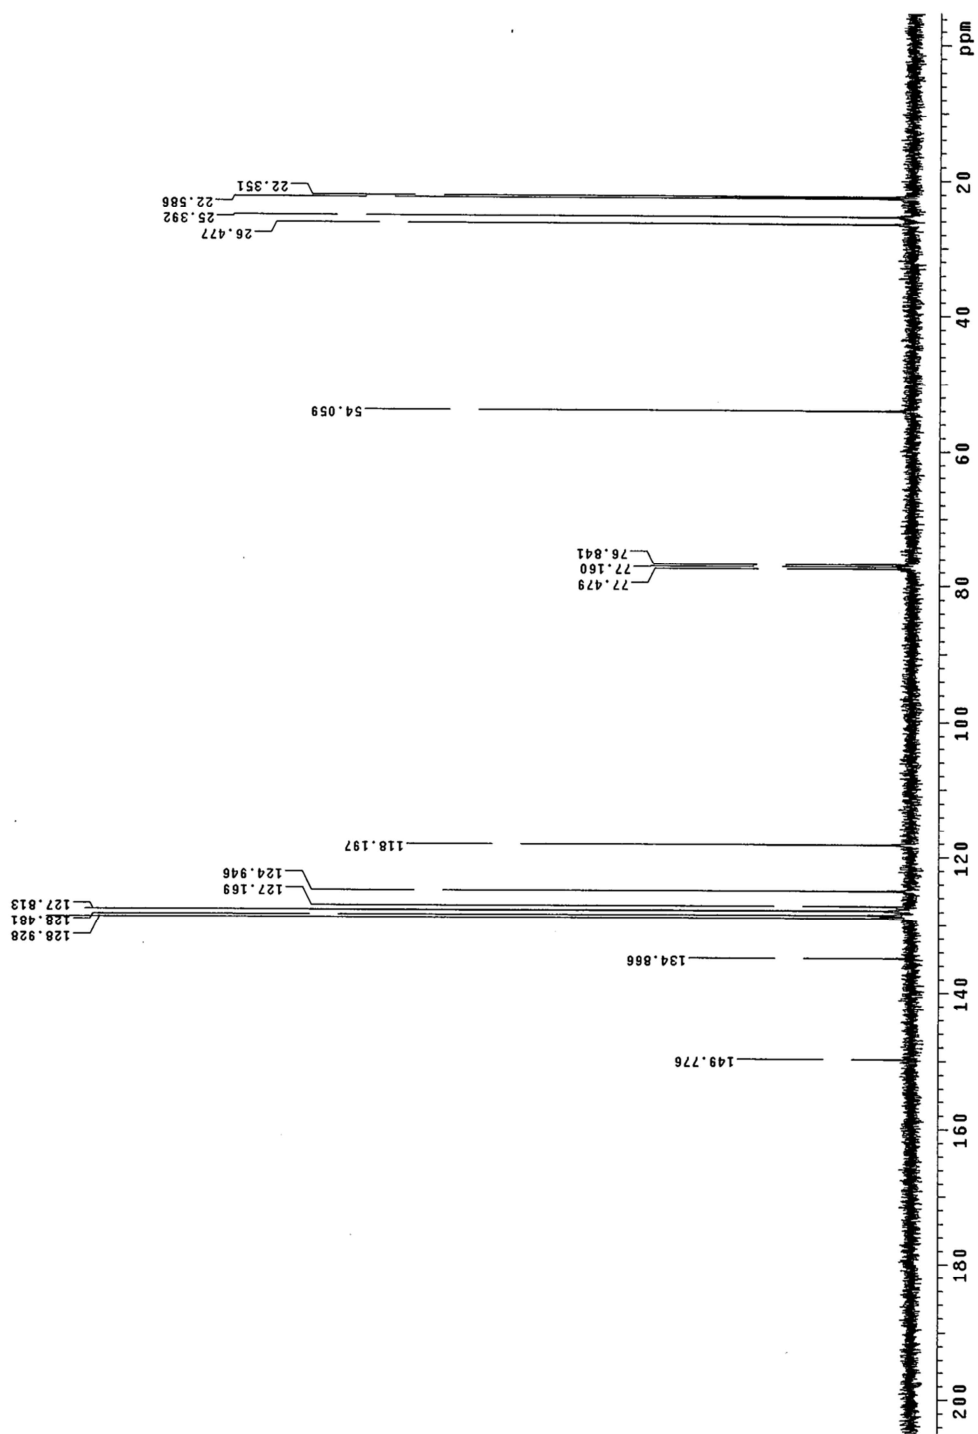

*1-benzyl-4-cyclohexyl-1H-1,2,3-triazole* (Figure 1, 8d). The representative procedure was followed to yield **8d** (99.3 mg, 82%);  $^1\text{H}$  NMR (400 MHz,  $\text{CDCl}_3$ )  $\delta$  7.33 (m, 3H), 7.23 (m, 2H), 7.15 (s, 1H), 5.45 (s, 2H), 2.72 (m, 1H), 2.01 (m, 2H), 1.71 (m, 3H), 1.35 (m, 4H), 1.21 (m, 1H) ppm;  $^{13}\text{C}$  NMR (100 MHz,  $\text{CDCl}_3$ )  $\delta$  154.0, 134.9, 128.9, 128.4, 127.9, 119.2, 54.0, 35.4, 33.1, 26.3, 26.2 ppm; IR (neat) 3107, 2354, 1632, 1453, 1211  $\text{cm}^{-1}$ ; HRMS (EI+) calcd for  $\text{C}_{15}\text{H}_{19}\text{N}_3$  ( $\text{M}^+$ ) 241.1579, found 241.1579.

$^1\text{H}$  NMR (400 MHz) at 25 °C

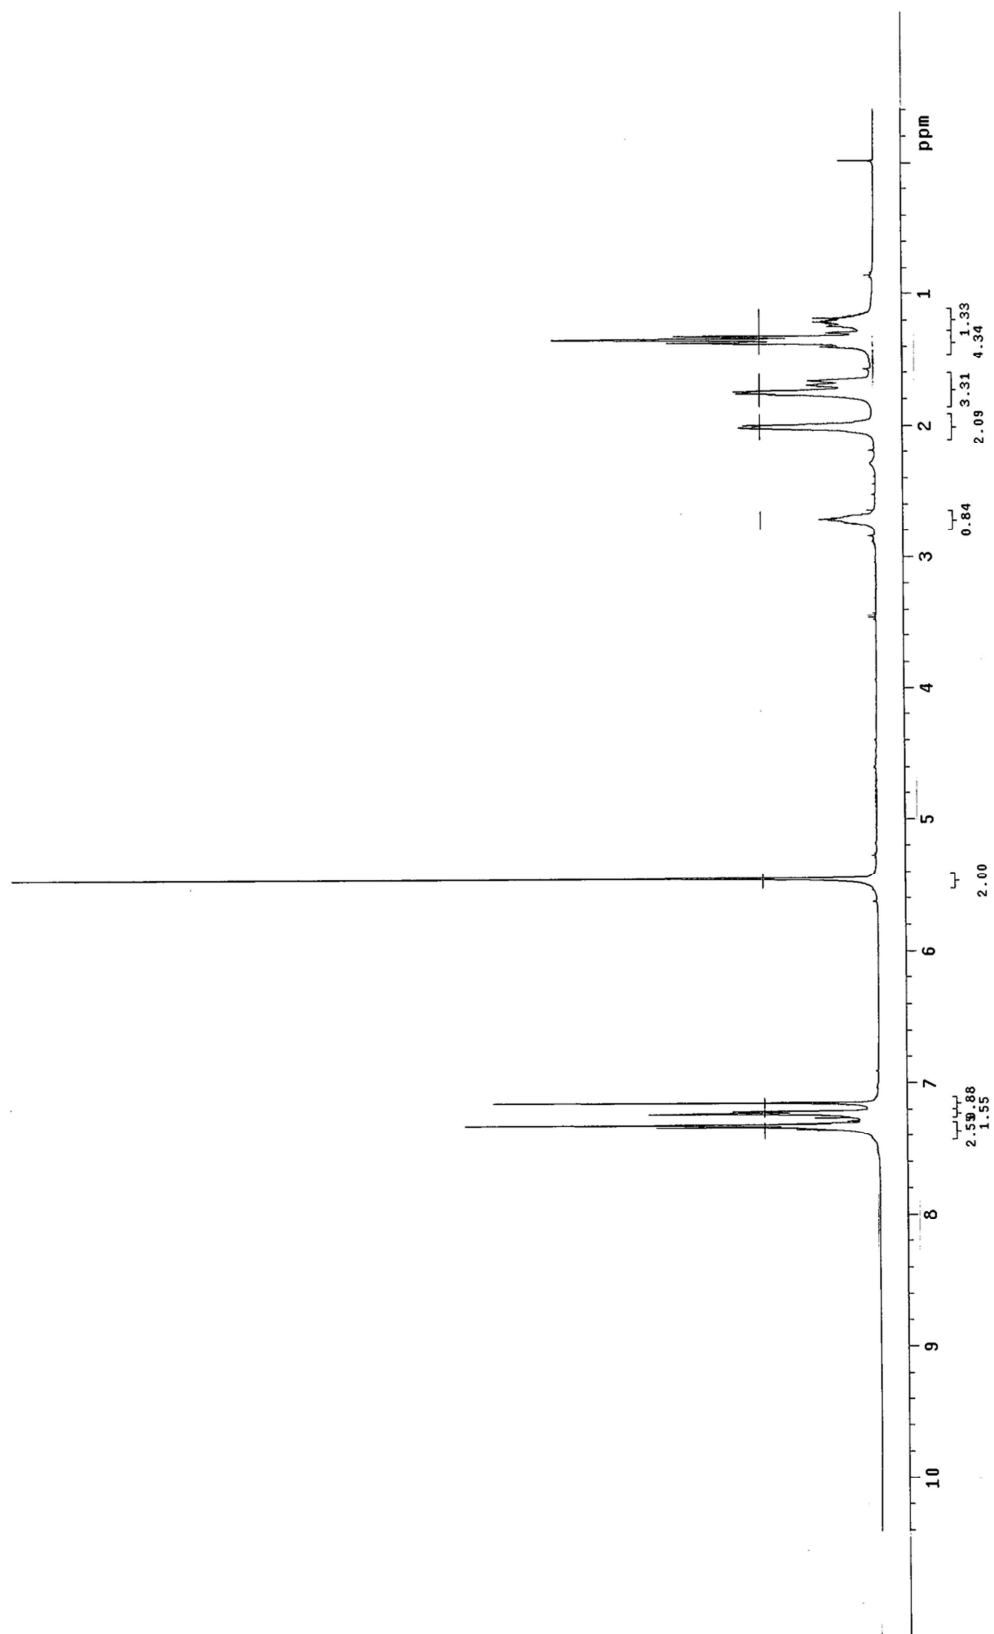

$^{13}\text{C}$  NMR (100 MHz) at 25 °C

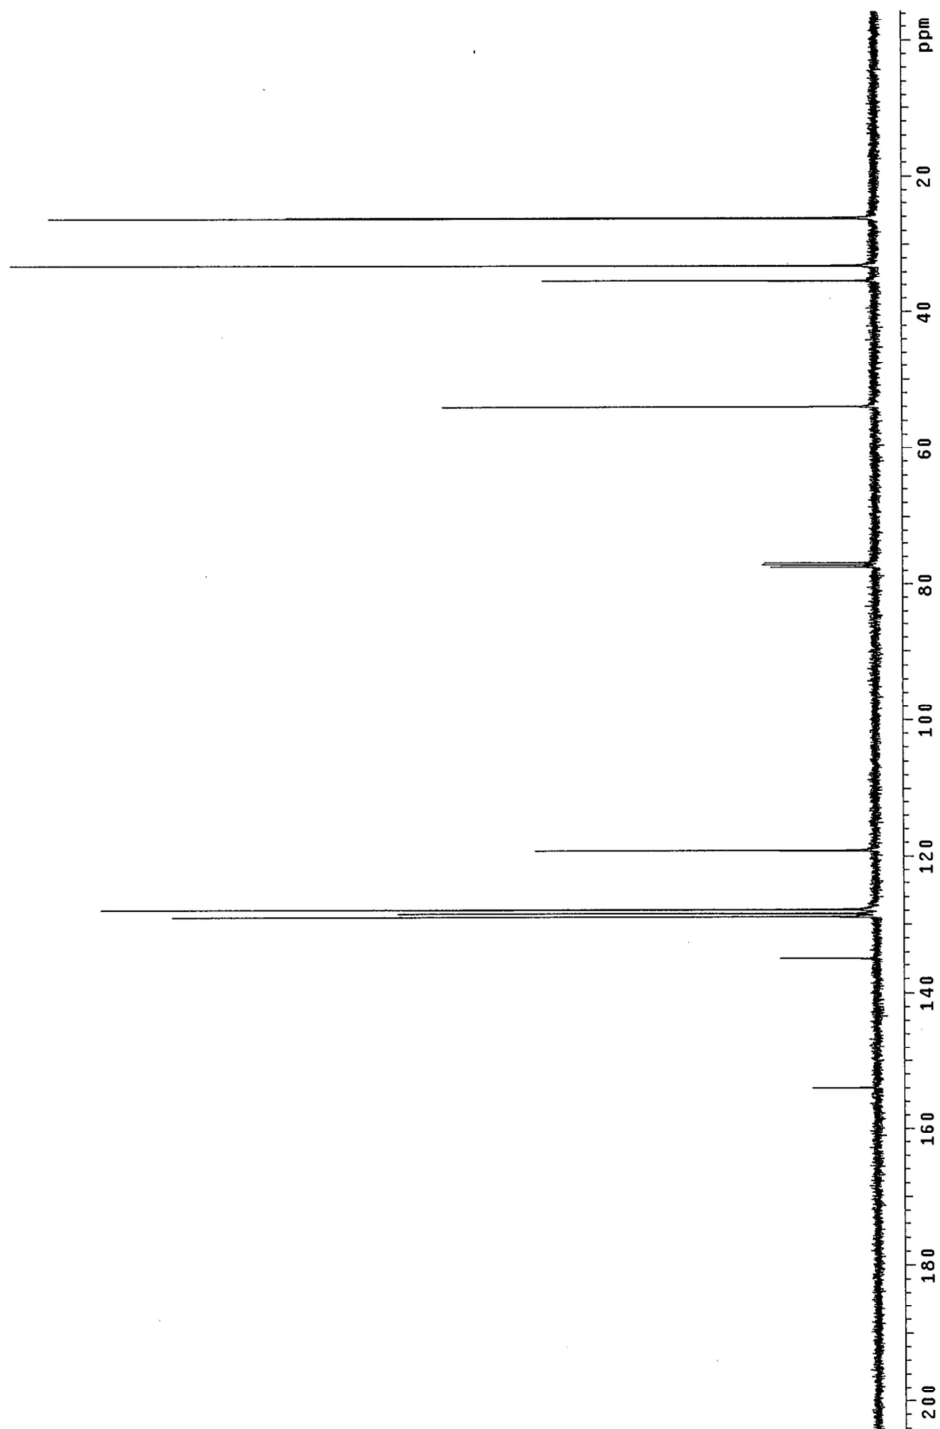

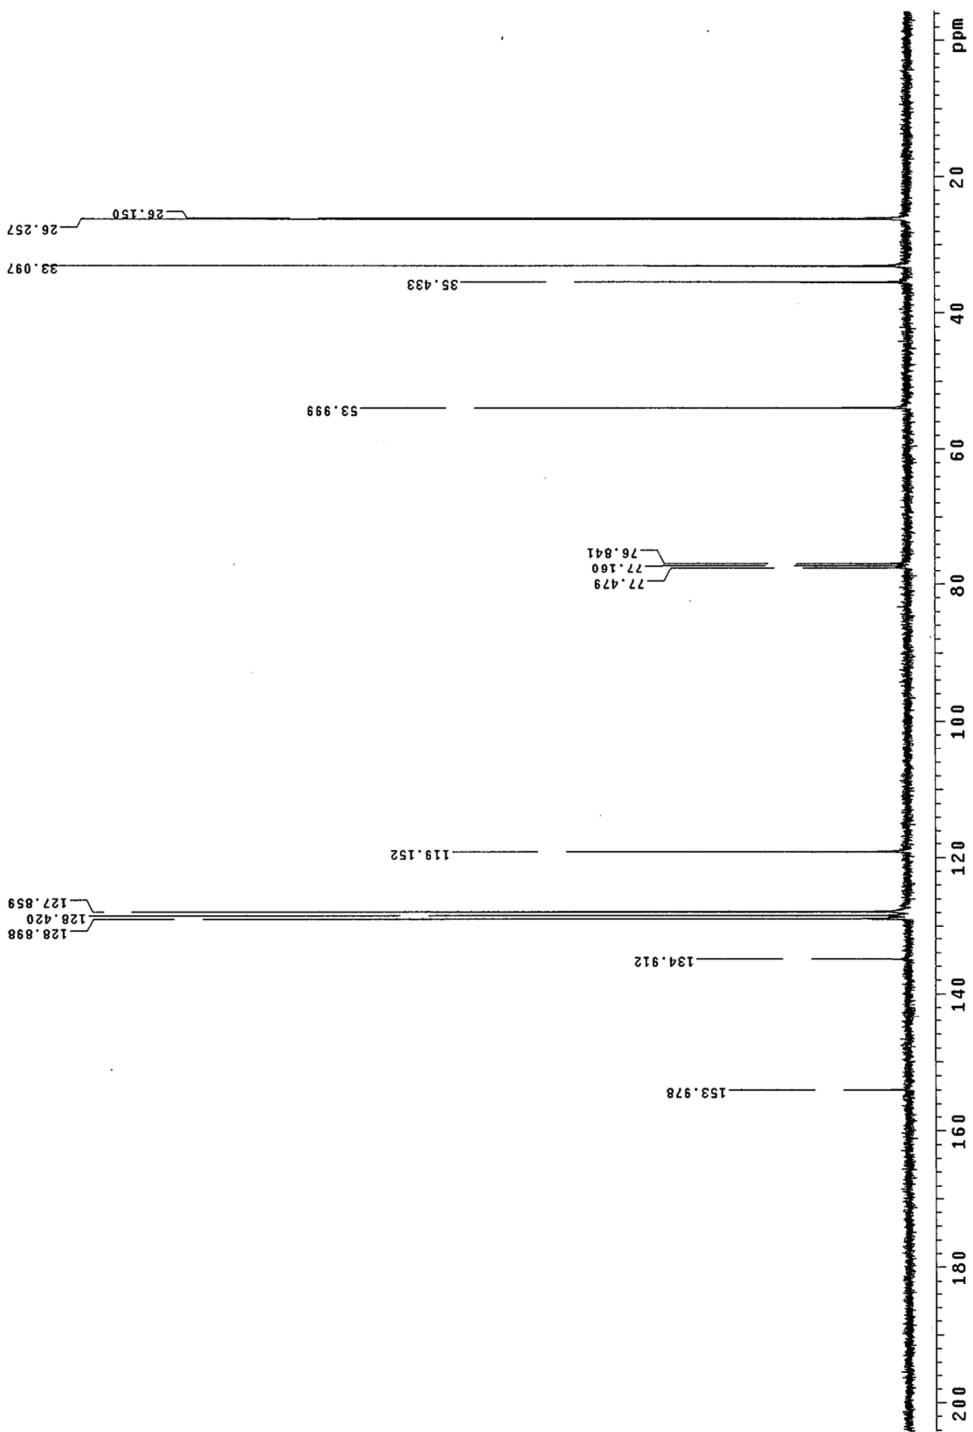



*1-benzyl-4-cyclopropyl-1H-1,2,3-triazole* (Figure 1, 9d). The representative procedure was followed to yield **9d** (51.5 mg, 52%);  $^1\text{H}$  NMR (400 MHz,  $\text{CDCl}_3$ )  $\delta$  7.35 (m, 3H), 7.27 (m, 2H), 7.13 (s, 1H), 5.45 (s, 2H), 1.91 (m, 1H), 0.87 (m, 4H) ppm;  $^{13}\text{C}$  NMR (100 MHz,  $\text{CDCl}_3$ )  $\delta$  150.6, 134.9, 129.0, 128.5, 128.0, 119.6, 54.1, 8.0, 7.0 ppm; IR (neat) 3072, 2250, 1562, 1497, 1218  $\text{cm}^{-1}$ ; HRMS (FAB+) caclcd for  $\text{C}_{12}\text{H}_{13}\text{N}_3$  ( $\text{M}+\text{H}$ ) $^+$  200.1188, found 200.1190.

$^1\text{H}$  NMR (400 MHz) at 25 °C

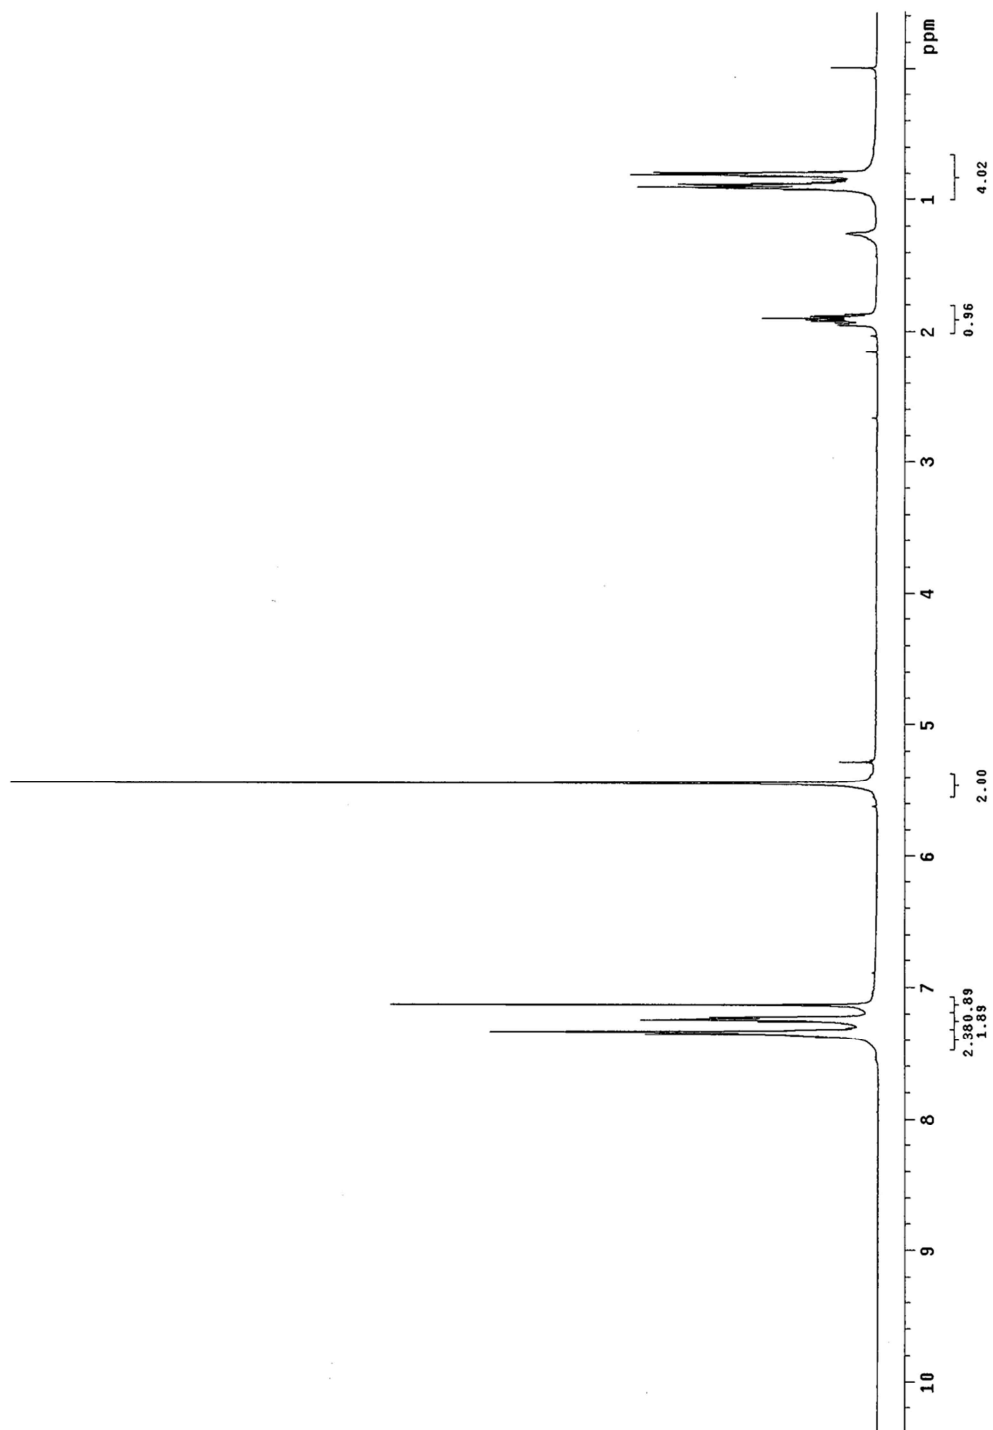

$^{13}\text{C}$  NMR (100 MHz) at 25 °C

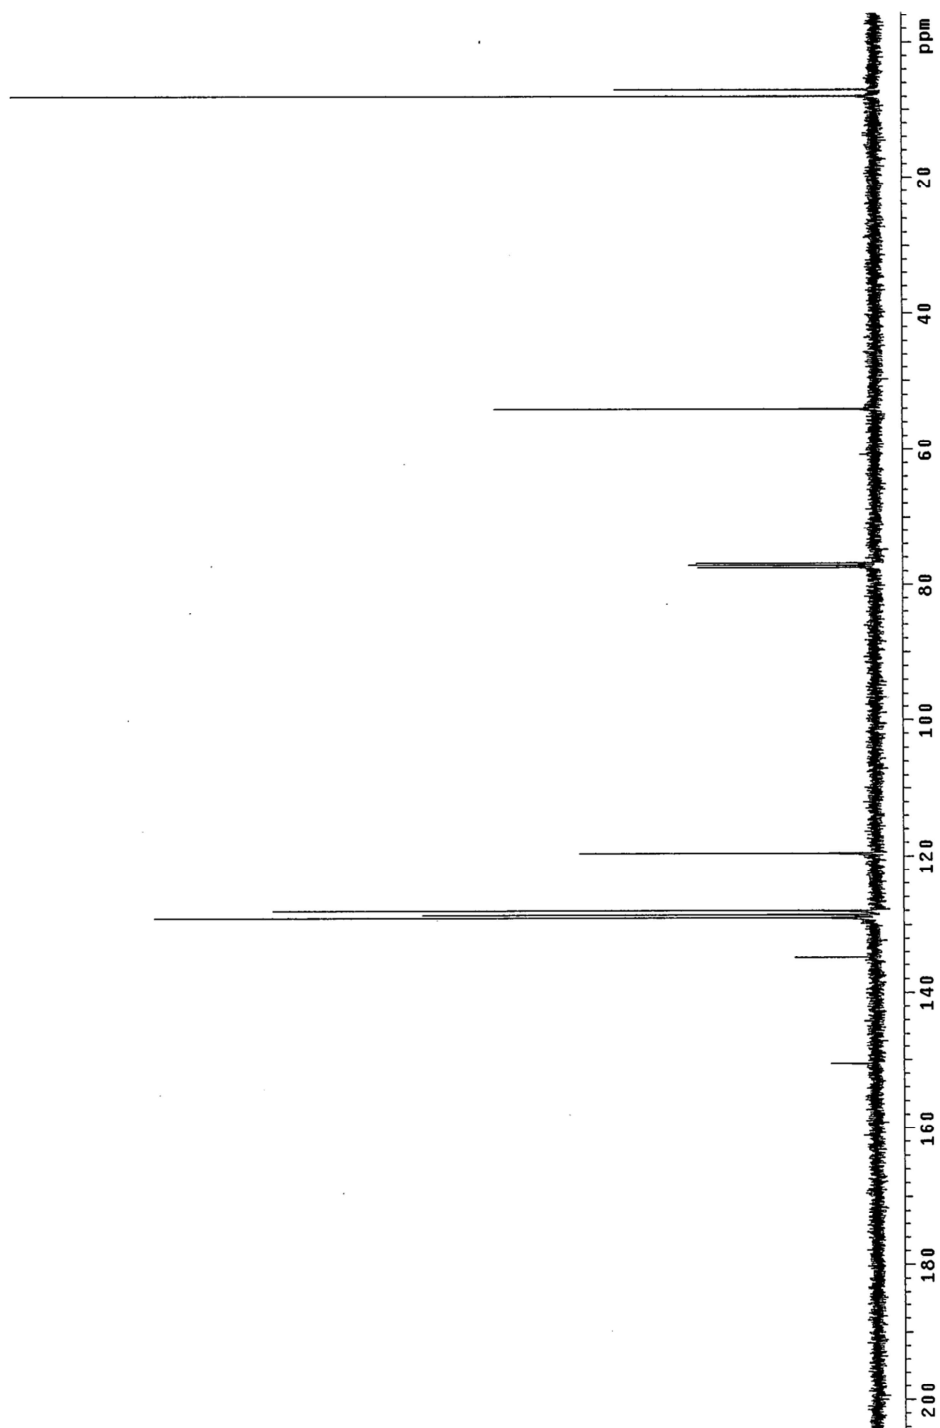

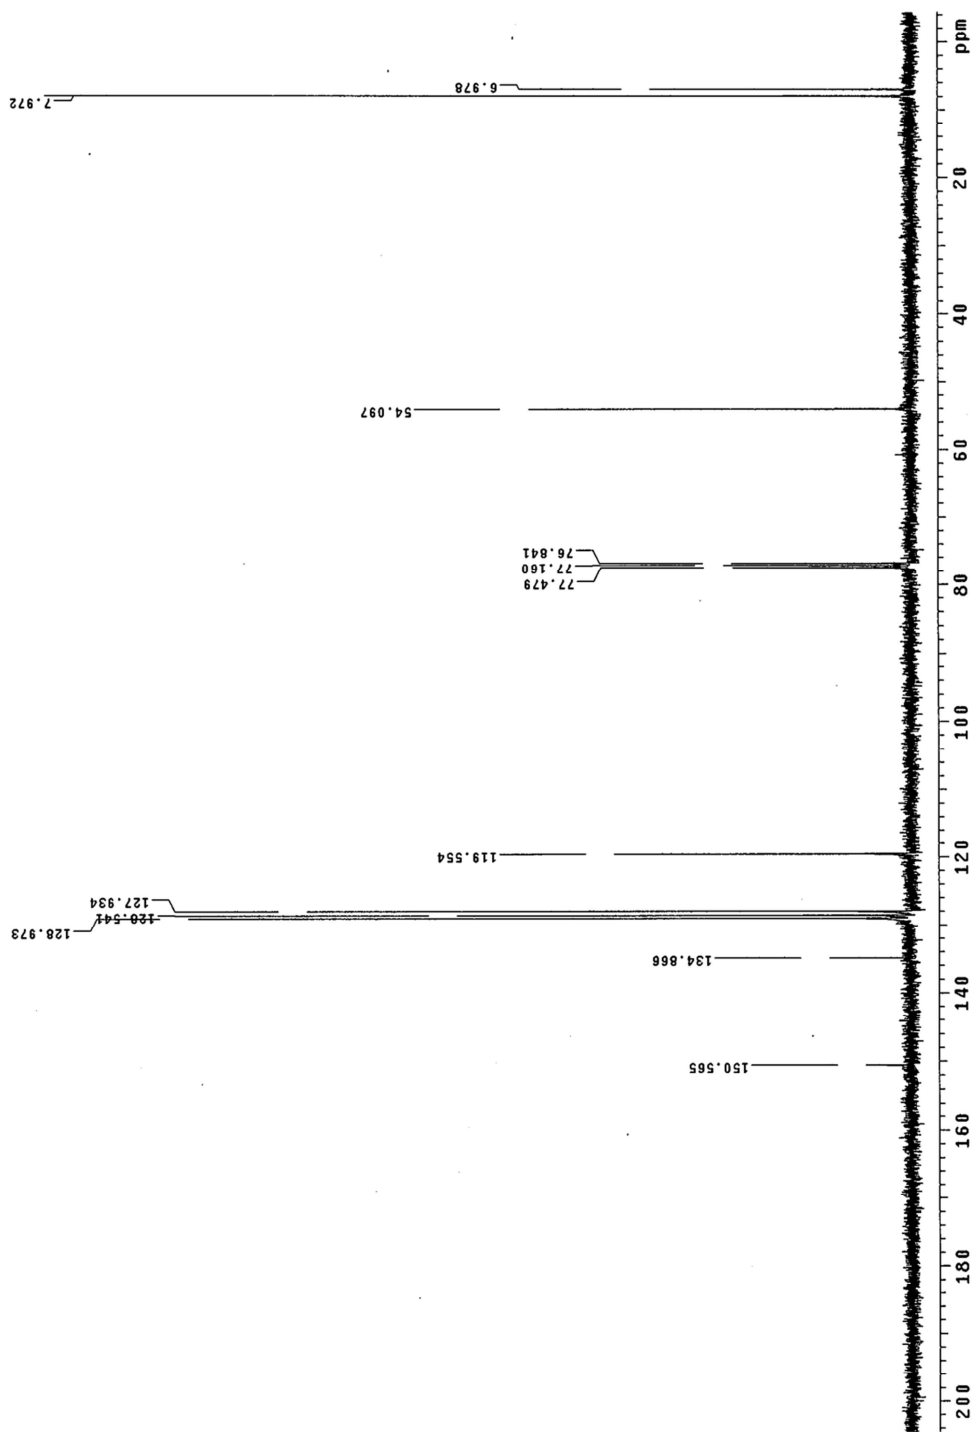

*1-benzyl-4-pentyl-1H-1,2,3-triazole* (Figure 1, 10d). The representative procedure was followed to yield **10d** (81.5 mg, 71%);  $^1\text{H}$  NMR (400 MHz,  $\text{CDCl}_3$ )  $\delta$  7.34 (m, 3H), 7.25 (m, 2H), 7.17 (s, 1H), 5.47 (s, 2H), 2.66 (t,  $J = 7.6$  Hz, 2H), 1.63 (m, 2H), 1.28 (m, 4H), 0.86 (m, 3H) ppm;  $^{13}\text{C}$  NMR (100 MHz,  $\text{CDCl}_3$ )  $\delta$  148.8, 134.9, 128.9, 128.5, 127.8, 120.4, 54.0, 31.6, 29.2, 25.8, 22.5, 14.2 ppm; IR (neat) 3065, 2350, 1643, 1456, 1213  $\text{cm}^{-1}$ ; HRMS (FAB+) calcd for  $\text{C}_{14}\text{H}_{19}\text{N}_3$  ( $\text{M}+\text{H}$ ) $^+$  230.1657, found 230.1658.

$^1\text{H}$  NMR (400 MHz) at 25 °C

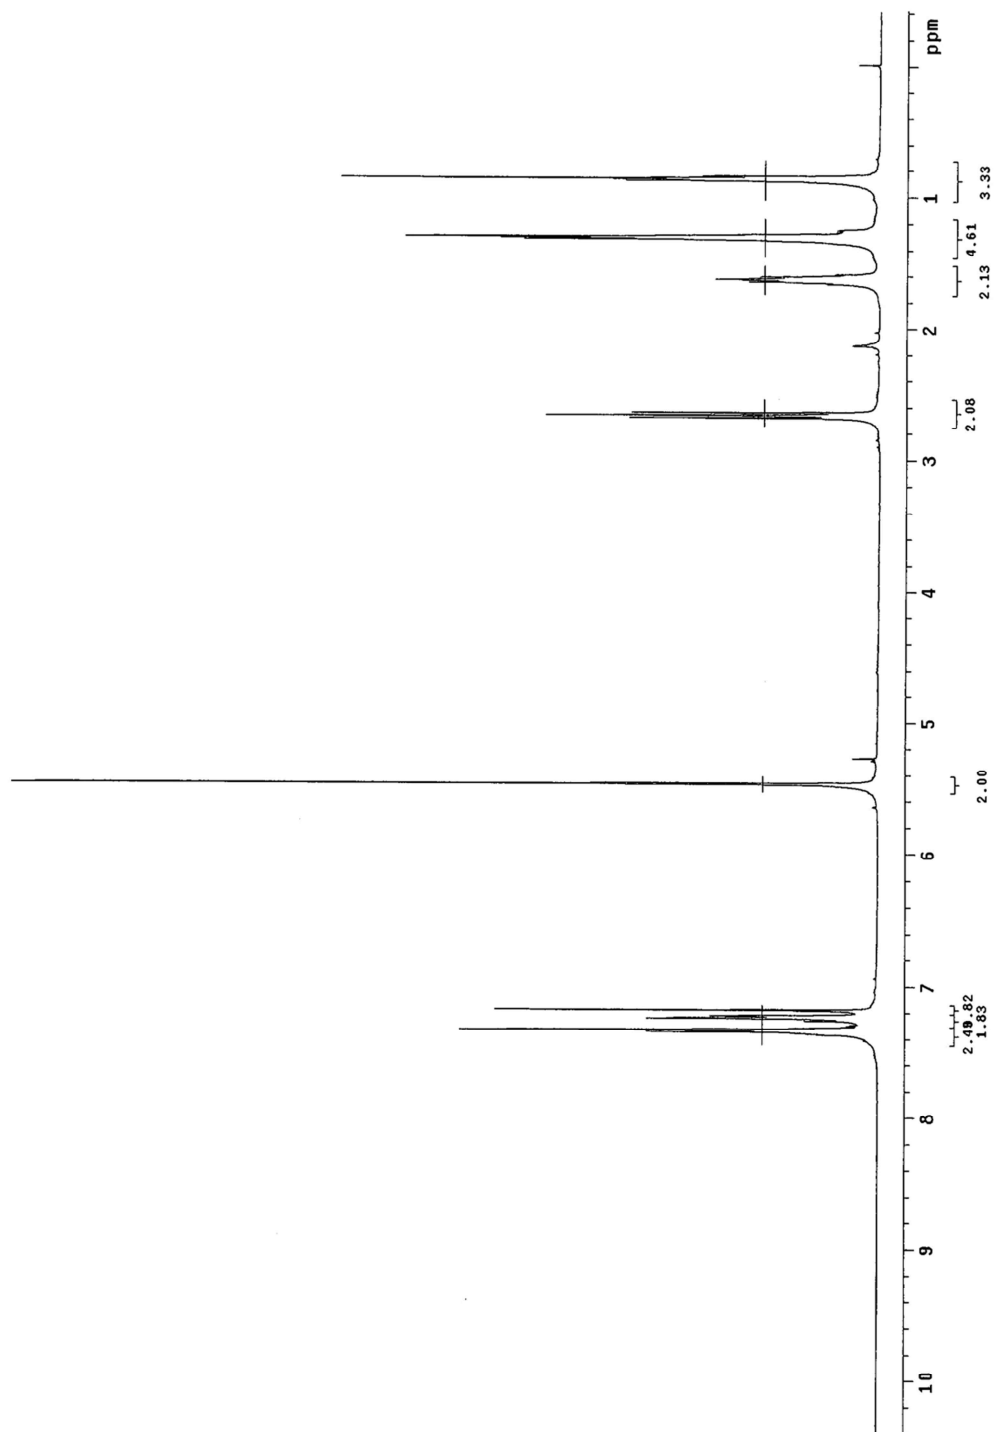

$^{13}\text{C}$  NMR (100 MHz) at 25 °C

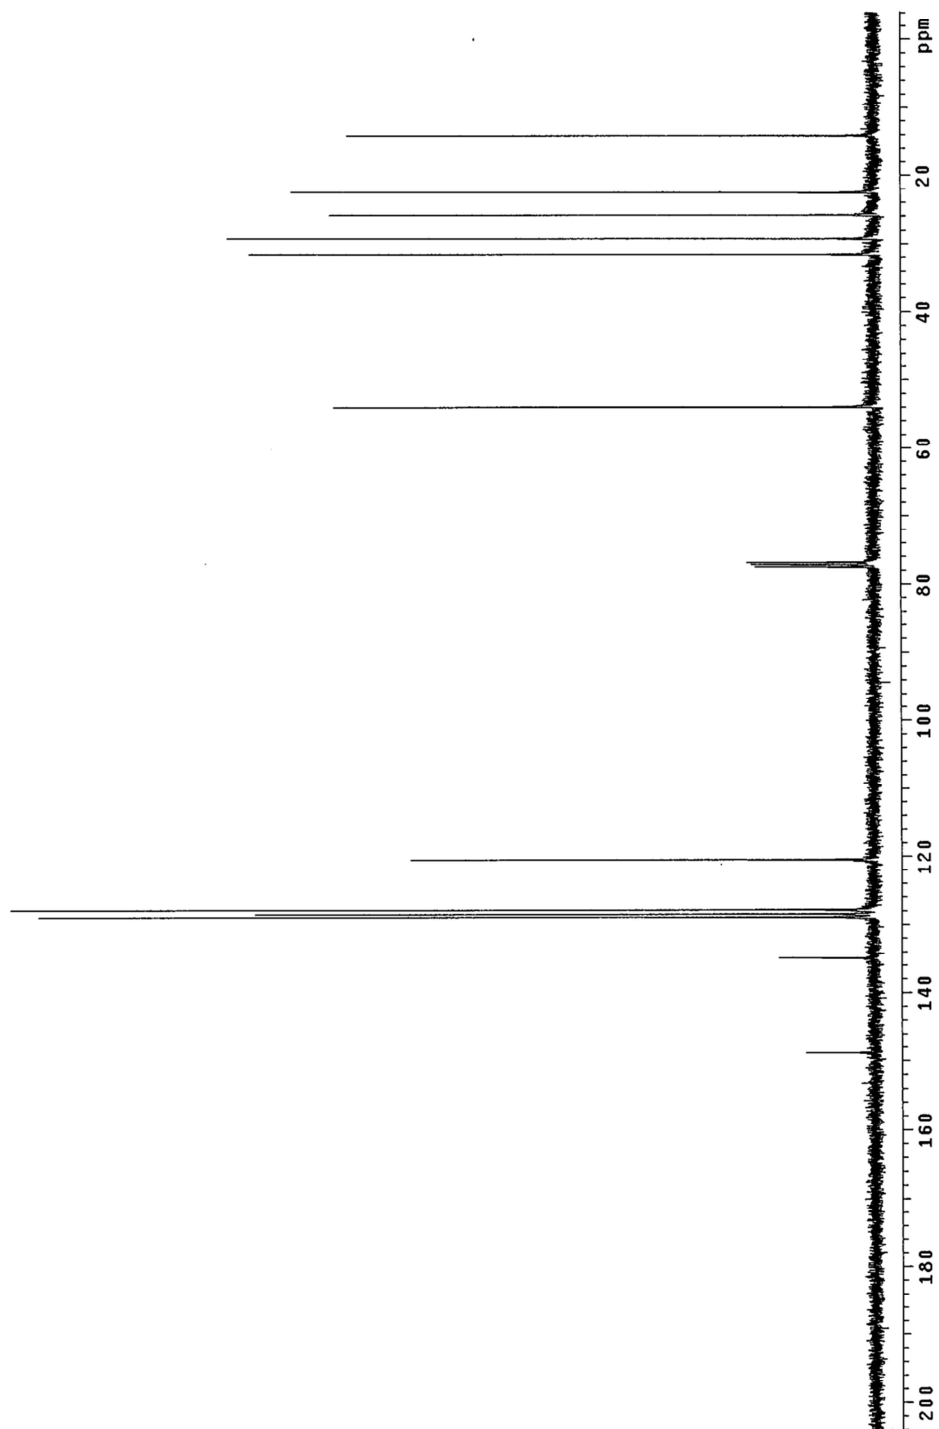

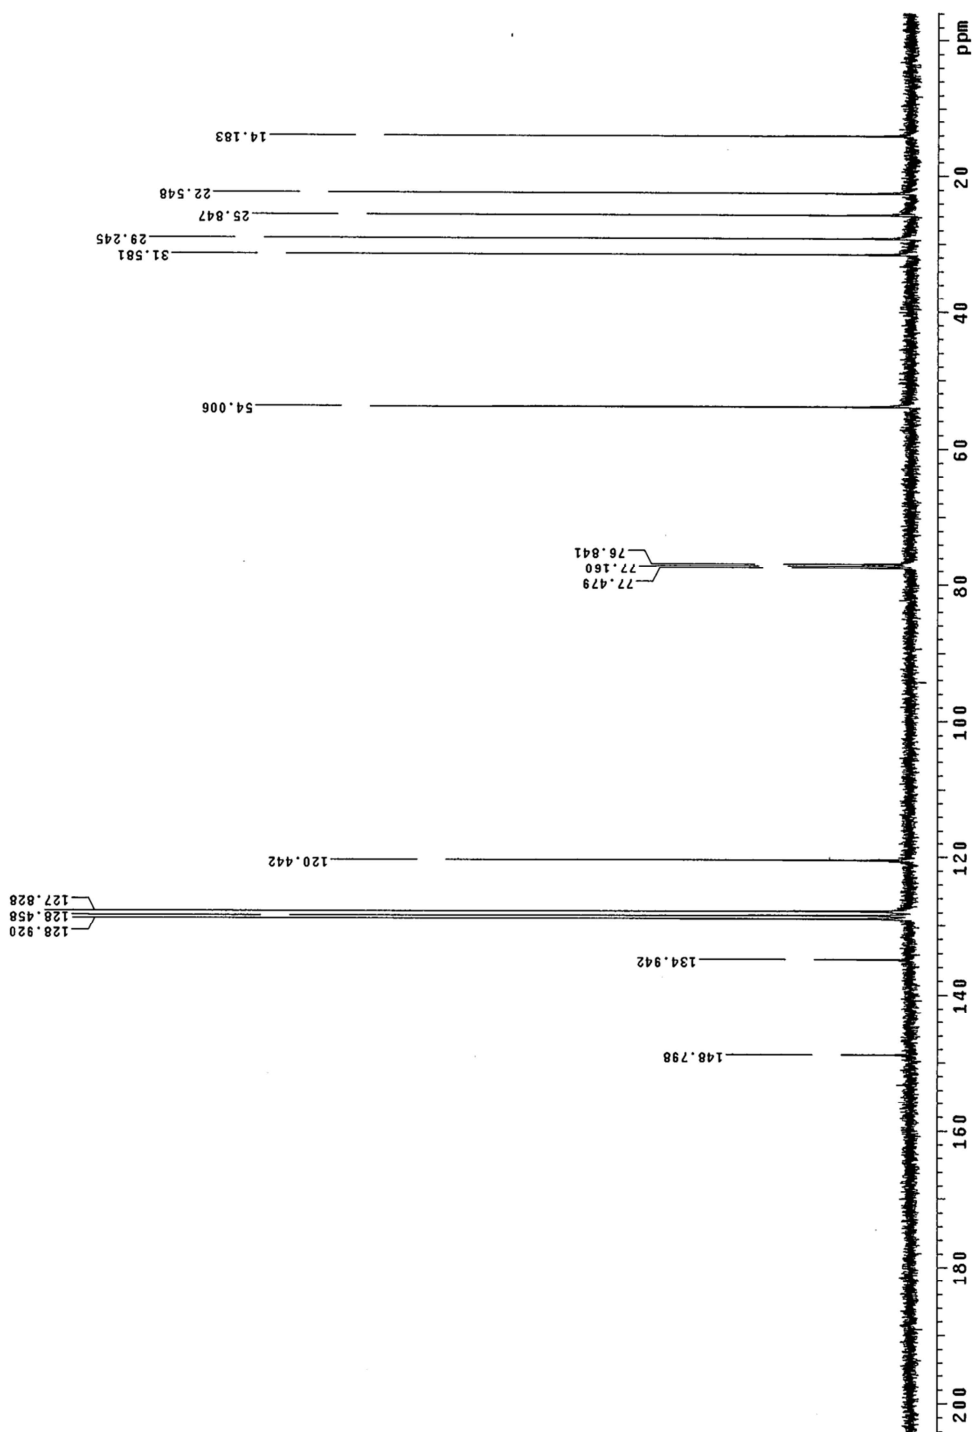



*1-benzyl-4-(trimethylsilyl)-1H-1,2,3-triazole* (Figure 1, 11d). The representative procedure was followed to yield **11d** (93.4 mg, 81%); <sup>1</sup>H NMR (400 MHz, CDCl<sub>3</sub>) δ 7.43 (s, 1H), 7.34 (m, 3H), 7.25 (m, 2H), 5.53 (s, 2H), 0.28 (s, 9H) ppm; <sup>13</sup>C NMR (100 MHz, CDCl<sub>3</sub>) δ 146.9, 134.9, 129.0, 128.7, 128.5, 128.0, 53.5, -0.9 ppm; IR (neat) 3106, 2360, 1679, 1449, 1248 cm<sup>-1</sup>; HRMS (EI<sup>+</sup>) calcd for C<sub>12</sub>H<sub>17</sub>N<sub>3</sub>S<sub>1</sub> (M<sup>+</sup>) 231.1192, found 231.1193.

$^1\text{H}$  NMR (400 MHz) at 25 °C

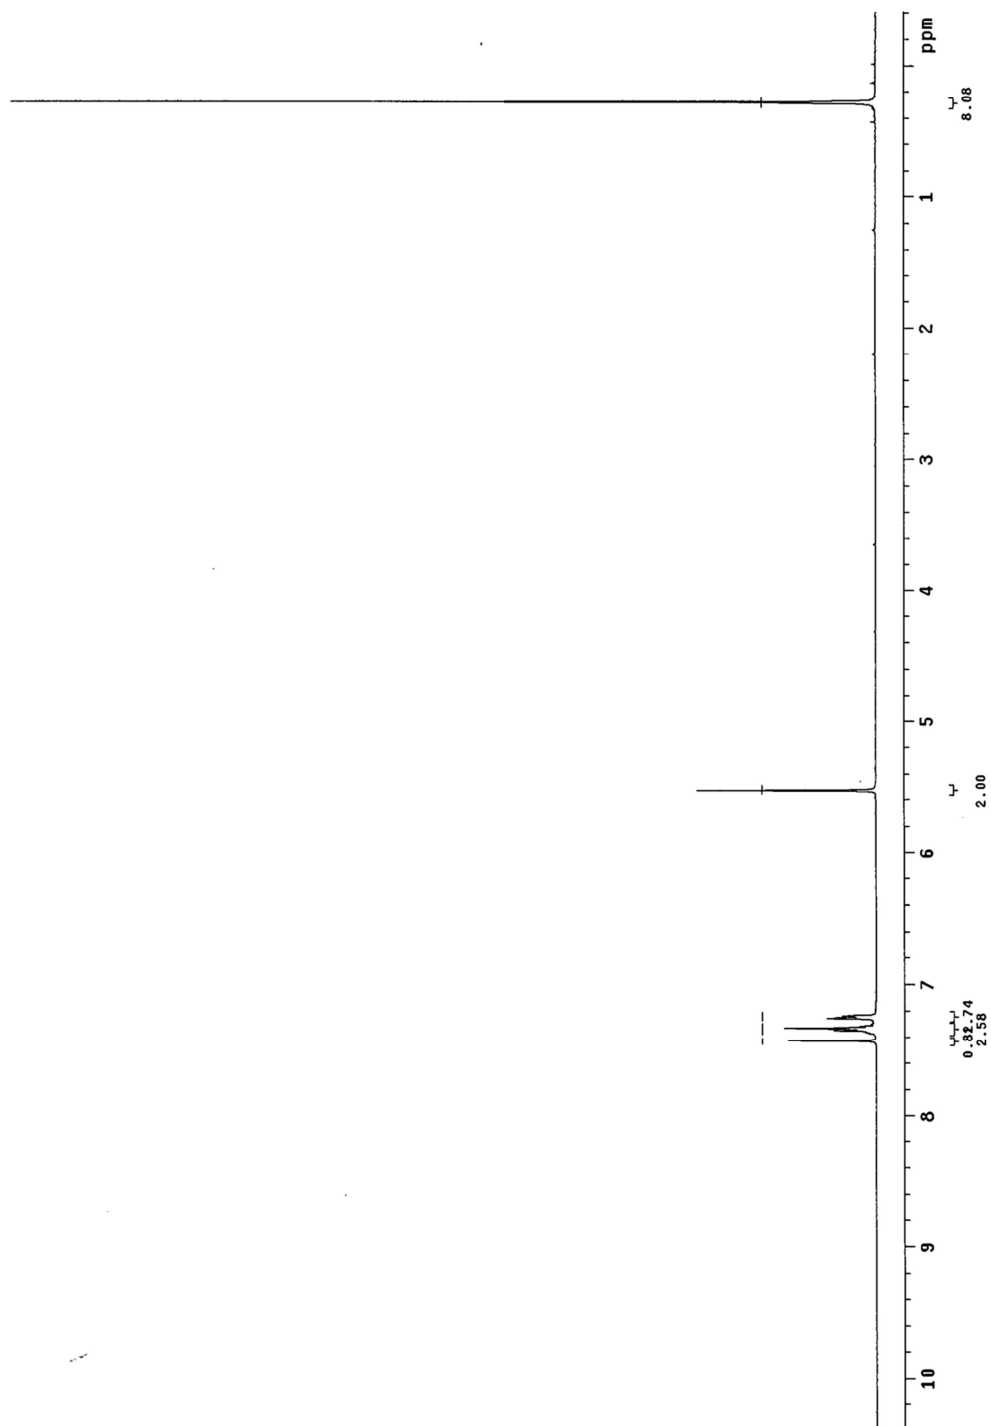

$^{13}\text{C}$  NMR (100 MHz) at 25 °C

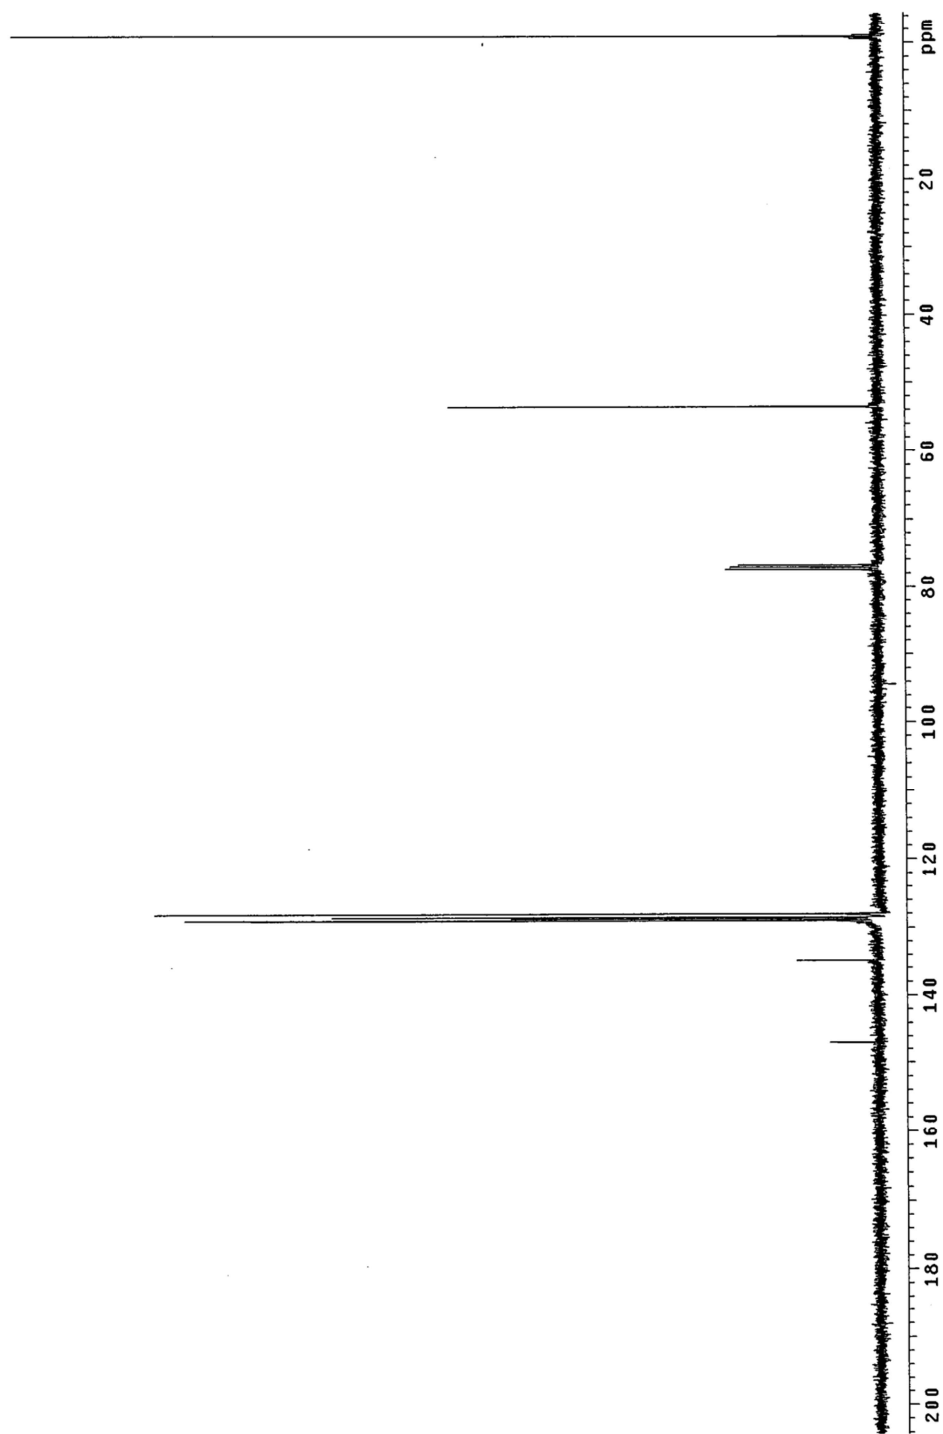

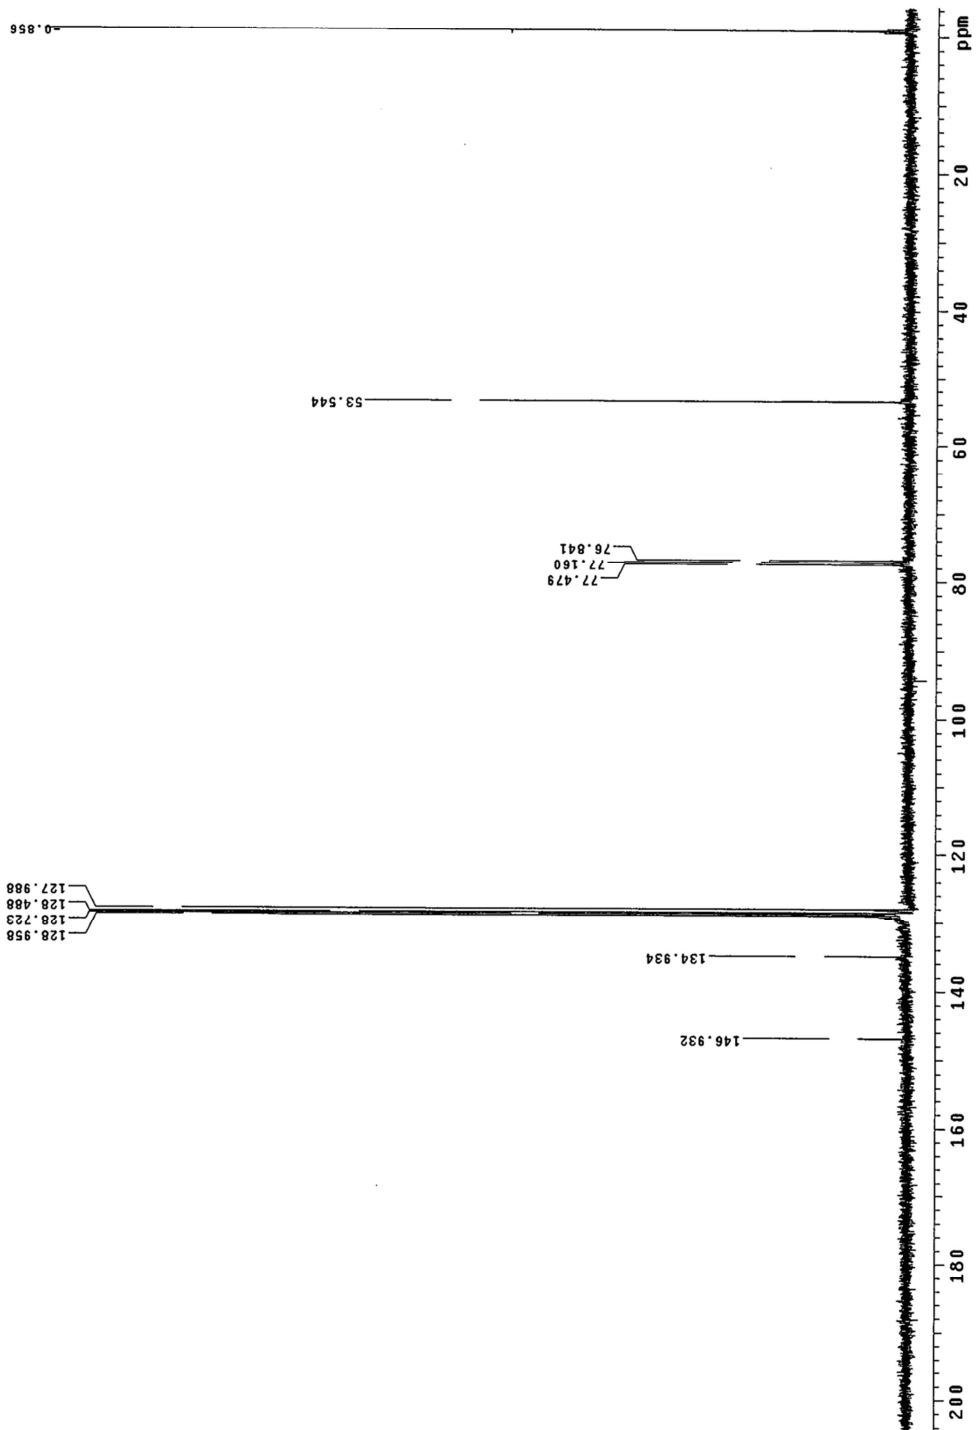

*1-octyl-4-phenyl-1H-1,2,3-triazole (12d)*. The general procedure was followed to yield **12d** (120.3 mg, 93 %);  $^1\text{H}$  NMR (400 MHz,  $\text{CDCl}_3$ )  $\delta$  7.81 (d, 2H,  $J = 8.4$  Hz), 7.74 (s, 1H), 7.39 (t, 2H,  $J = 7.6$  Hz), 7.29 (t, 1H,  $J = 7.6$  Hz), 4.33 (t, 2H,  $J = 7.2$  Hz), 1.89 (m, 2H), 1.27 (m, 10H), 0.86 (t, 3H,  $J = 5.6$  Hz) ppm;  $^{13}\text{C}$  NMR (100 MHz,  $\text{CDCl}_3$ )  $\delta$  147.4, 130.6, 128.7, 127.9, 125.5, 119.4, 50.4, 31.8, 30.5, 29.2, 29.1, 26.6, 22.7, 14.2 ppm; IR (neat) 3392, 2955, 1635, 1217  $\text{cm}^{-1}$ ; HRMS (EI+) calcd for  $\text{C}_{16}\text{H}_{23}\text{N}_3(\text{M}^+)$  257.1892, found 257.1889.

$^1\text{H}$  NMR (400 MHz) at 25 °C

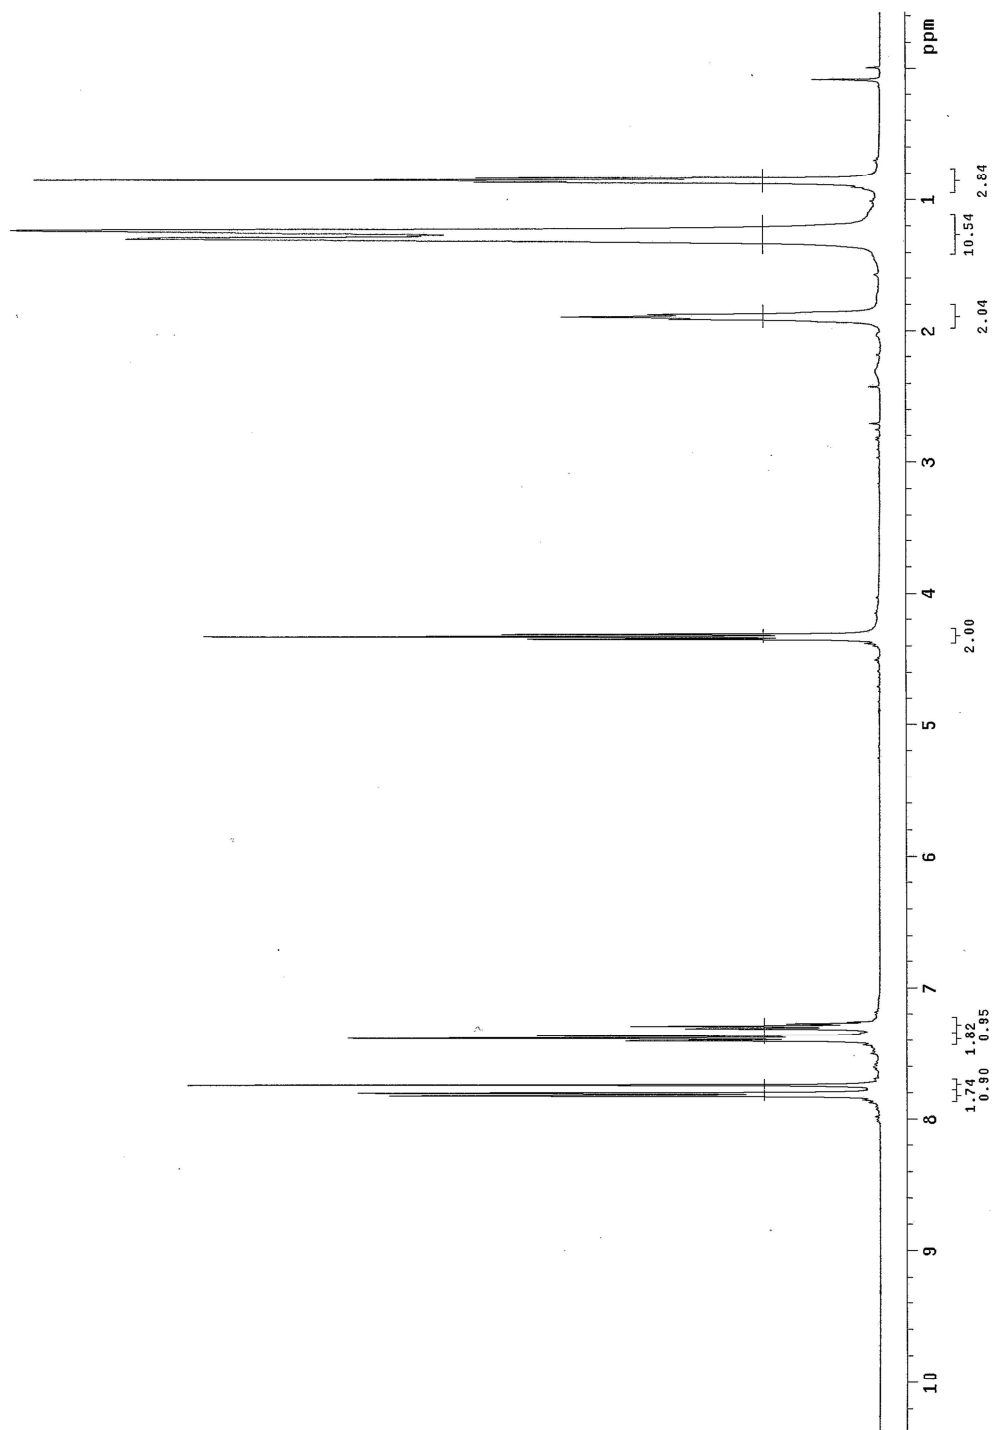

$^{13}\text{C}$  NMR (100 MHz) at 25 °C

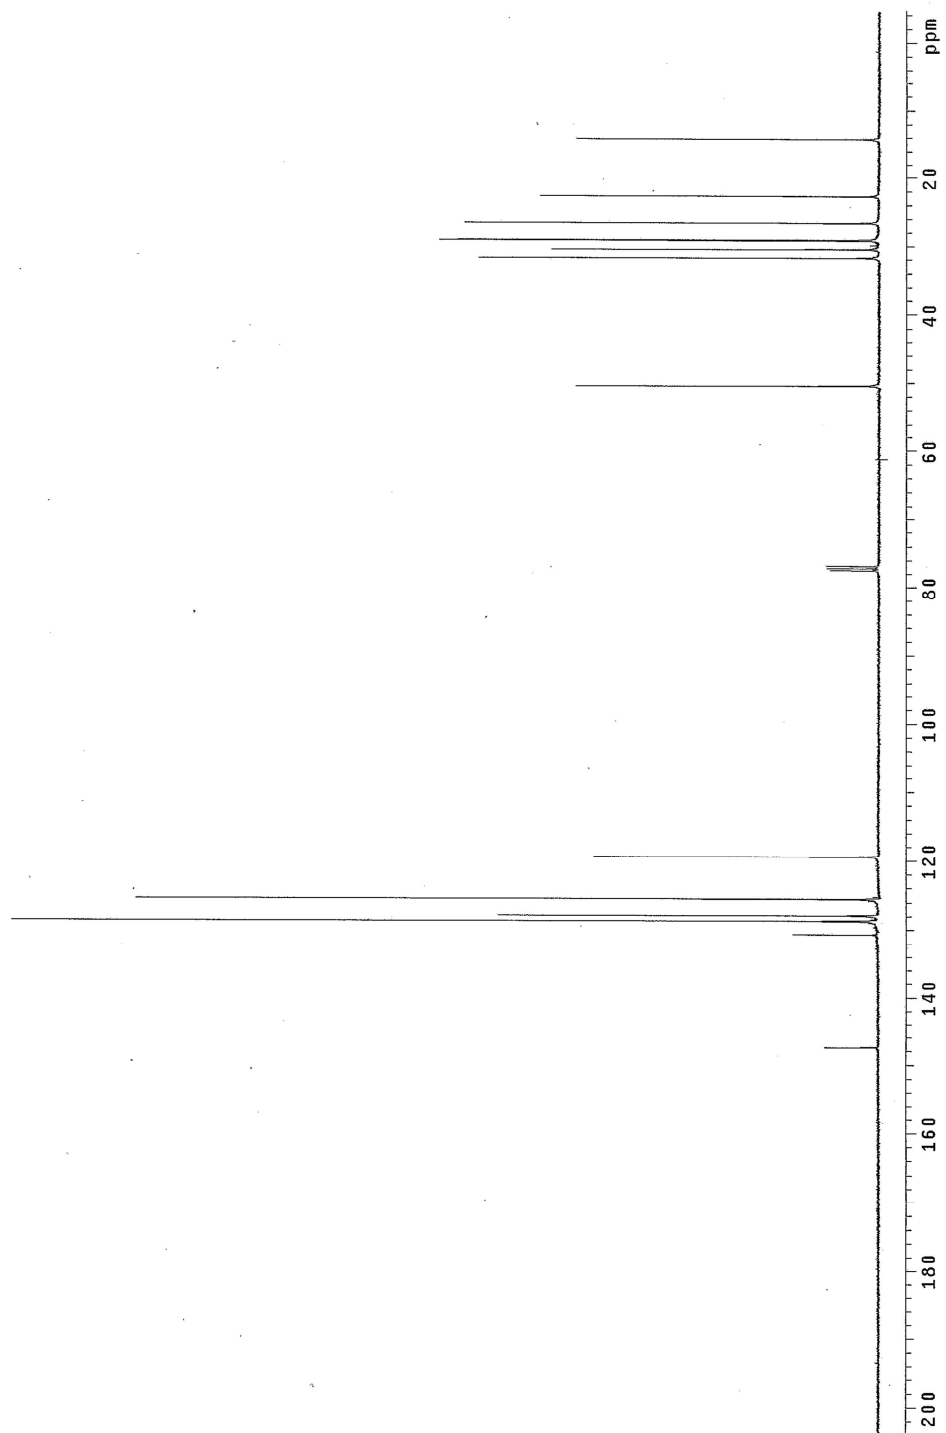

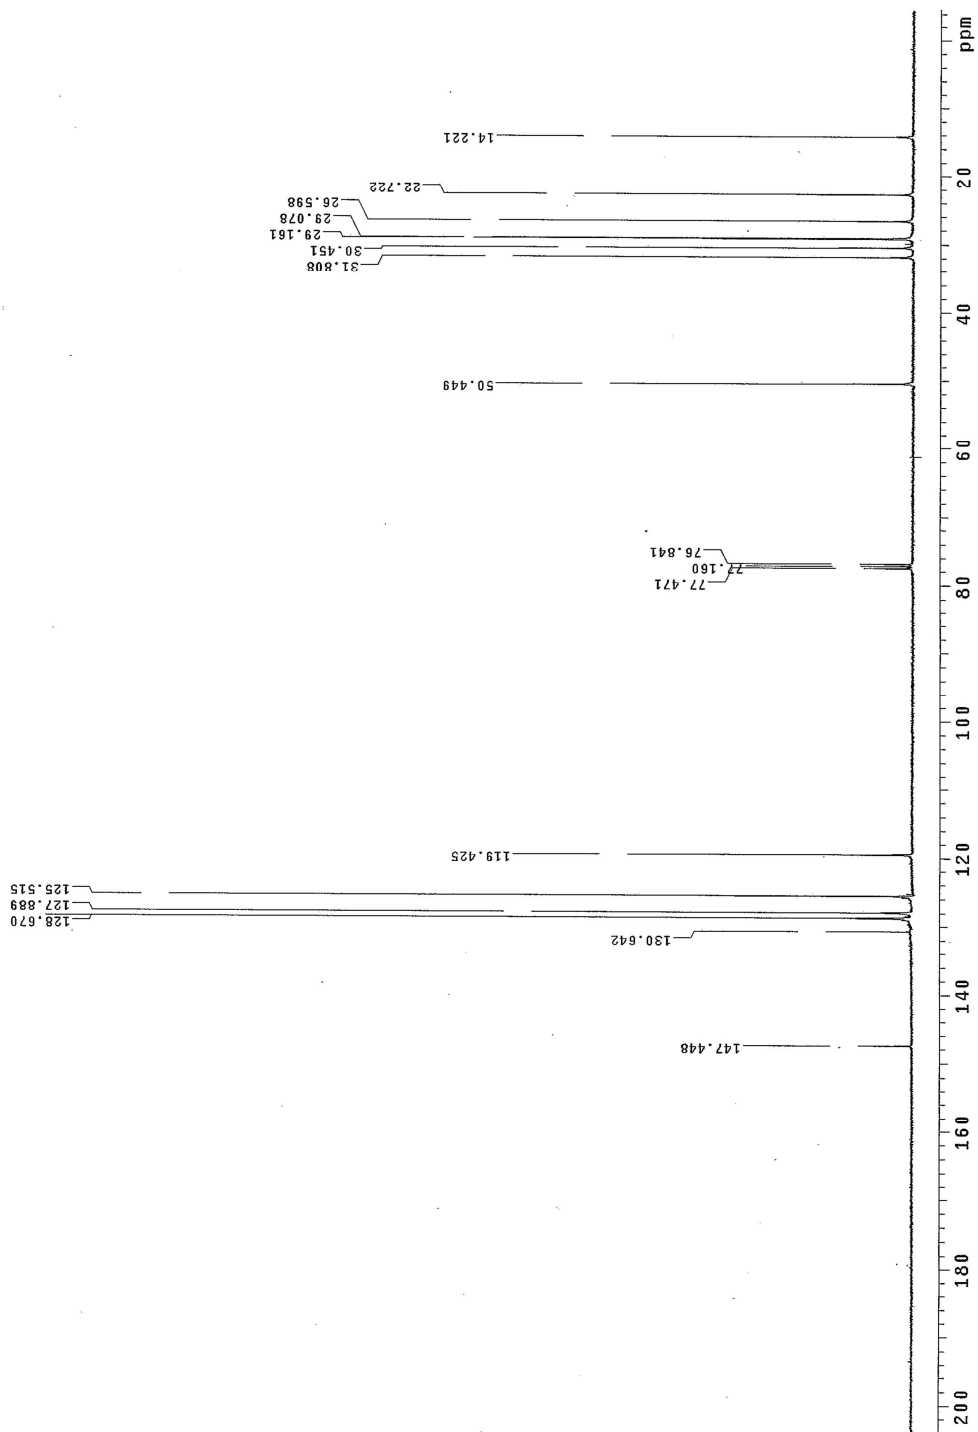

Supplement: c5cy00783f1.pdf [file c5cy00783f1.pdf]
